# Supplementary material for: Molecular Processes in Stress Urinary Incontinence: A Systematic Review of Human and Animal Studies
Source: Int J Mol Sci. 2022 Mar 21;23(6):3401. doi: 10.3390/ijms23063401 (PMC8949972; doi:10.3390/ijms23063401)
Supplement: Supplementary file 1 [file ijms-23-03401-s001.zip]

Archive with 4 entries (4 files):
- Supplement 6 Review protocol Prospero.pdf
- Supplement 7 - Search 5-1-21.pdf
- Supplement 8 in vitro questions.pdf
- Supplementary tables for manuscript kopie.xlsx
