# Supplementary material for: Molecular Processes in Stress Urinary Incontinence: A Systematic Review of Human and Animal Studies
Source: Int J Mol Sci. 2022 Mar 21;23(6):3401. doi: 10.3390/ijms23063401 (PMC8949972; doi:10.3390/ijms23063401)
Supplement: Supplementary file 1 [file ijms-23-03401-s001.zip › Supplementary tables for manuscript kopie.xlsx]

## Sheet: Suppl. 1 Human studies
First author year of publication	SUI/ SUI+POP	GV/GE/PE	Assay methods used	No. of patients **	No. of controls**	Definition trait	Medication use	Exclusion criteria	Definition controls	Tissue and location	Age	BMI	Parity	Menopausal status	Comorbidity	Investigated gene/protein/genetic variant(s)
Ulmsten et al. 1987	SUI	PE	Stegeman & Stalder	8	6	Based on medical history and urodynamic investigations (incl pressure tests, incl coughing), >5y genuine SUI, negative closure pressure and obvious leakage of urine on cough provocation	NI	NI	Free from any urinary problems, benign gynecologic disorders (minor uterine myomas, ivarian cyts etc.), did not leak and displayed a positive closure pressure and could therefore beclassified ascontinent.	Skin: lower margin pfannenstiehl, and ligamentum rotundum	SUI mean 47 range (39-55), control 43 range(34-56)	NI	SUI mean 1.7 (range 0-3), ctrl mean 1.4 (range 0-3)	NI	NI	collagen/hydroxyproline
Rechberger et al. 1993	SUI+POP	PE	Stageman and Stalder, ELISA, Lowry protein assay	11	5	SUI excl UUI with detrusor overactivity	NI	UUI caused by detrusor instability excluded by cystometry	Cystocele without UI	Partial resection of vesico-vaginal fascia	SUI49,6 +/-16.5 vs control 48,2 +/-14,1 NS	NI	NI	SUI (5 premenopausal/6 postmenopausal) control 2 premenopausal/3 postmenopausal	Cystocele in both groups	Hydroxyproline, estrogen receptor
Bergman et al. 1994	SUI+POP	PE	Quantitative 2-D CNBr peptide mapping	6	4	SUI and POP interfered with their daily activity, urodynamically confirmed	Postmenopausal women got estrogen replacement therapy >4w prior UDO until biopsy	Detrusor instability	No pelvic relaxation, and no UDO findings of SUI (leiomyomata or ovarian tumors)	Skin of posterior fourchette at midline (skin and subcutaneous fascia 2x2x2cm), right uterosacral ligament, right round ligament	The woman without complaints were 4 years younger that the SUI+POP group	NI	"were comparable as per parity"	Were comparable as per menopausal status	POP	Type III/I collagen ratio
Falconer et al. 1994	SUI	PE	High pressure liquid chromatography, sircol red.	7	4	SUI defined by medical history, vaginal examination and urodynamic investigation	No hormonal therapy	POP or vaginal descensus	Continent (benign gynecologic disorders)	Fibroblasts derived from the skin biopsies lower abdominal wall	No differences among groups (cases mean 55 range 52-58, controls 58y range 55-62)	NI	No differences among groups (cases 1-3, controls 1-4)	All were at least 2 years postmenopausal	NI	3H-proline and 3H-hydroxyproline, collagen
Keane et al. 1997	SUI	PE	Electrophoresis densitometry, hydroxyproline assay, LKB 4400 amino acid analyser	36	25	Urodynamically proven SUI	NI	NI	Continent women (hospital personnel and university students)	Periurethral vagina	SUI median 38 (range 13-49) mean 33.6, control 25 (16-50) mean 30.7	SUI median 23.77 (19.2-33), control 23.45 (18.8-41.5)	All para 0	All premenopausal	25% in SUI group and 24% in control group had detrusor instabilty on urodynamics, however no Urgency or nocturia, No overactive bladder	Collagen content, Ratio collagen type I/III, hydroxylysinoketonorleucine and (hydroxylysyl)pyridinoline (both mature collagen crosslink).
Falconer et al. 1998a	SUI	GE and PE	Hydroxyproline extraction and quantification, transmission electron microscopy (collagen organization), Northern blot, Alcian blue precipitation, electrophoretic separation and quantification	15	16	Objectively by medical history, at least three years of SUI, gynecologic examination, pad test and urodynamic examination	No ongoing medication	Overweight (BMI>30), signs of local infection or systemic disease	No sign of pelvic supporting tissue insufficiency or urinary incontinence at gynecological examination	Vaginal biopsie 6–8 mm lateral to the external orifice of the urethra	SUI mean 44 (range 37-50), control 43 (37-51)	<BMI 30	SUI mean 2 (range 0-4), controls, 2 (0-5)	All premenopausal	NI	Hydroxyproline, and the degree of extraction by pepsin digestion , proteoglycan composition and concentration, mRNA levels of collagen 1 and 3, decorin and biglycan, versican), collagen organization
Falconer et al. 1998b	SUI	GE and PE	Hydroxyproline extraction and quantification, transmission electron microscopy (collagen organization), Northern blot (mRNA), Alcian blue precipitation electrophoretic separation and quantification	12	13	SUI >3years (medical history, gynecological exam, pad test and urodynamics)	Separately group with estrogen replacement therapy (>6months), further no ongoing medications	Infections or systemic diseases	No sign of pelvic supporting tissue insufficiency or urinary incontinence at gynecological examination	Biopsy 6–8mmlateral to the external orifice of the urethra	SUI no ERT 64 (58-72), control no ERT 64 (58-74)mean and range	NI	SUI 2 (0-4), control 3 (1-5)	All >4y postmenopausal	All healthy no signs of infection or systemic diseases	Hydroxyproline, collagen 1 gene expression corrected to GADPH, collagen 3 gene expression corrected to GADPH, non extractable collagen % of total collagen, proteoglycans biglycan and decorin and versican
Rechberger et al. 1998	SUI	PE	Woessner method, Pyrilinks kit, telopeptide-free tritium-labeled collagen substrate of Dean and Woessner	56	26	Genuine stress incontinence (no POP)	NI	NI	Cystocele without UI	Pubocervical and vesicovaginalfascia	SUI 49,8+/-9,4 vs control 50,1+/-14,4 P=0.91	28,1+/-3,8 vs 25,4 +/-4,1 (p=0.005)	3,0+/-1,2 vs control 3,0 +/-1,4 p=0.89	NI	Cystokele in control group	pyridinoline( fluorescent cross-linking compound of collagen fibers), hydroxyproline as a measurement of collagen content and collagenase activity
Liapis et al. 2000	SUI+POP	PE	IHC	32	20	SUI and POP stage 1	No hormonal replacement therapy	Detrusor instability	POP stage 1 or no POP and no SUI	Pubocervical fascia bladder neck	SUI 54.6+6.2 , POP, 58.2+9.1, control 51.8 +7.5 (p0.75)	SUI 28.28+2.8, POP 25.5+3.5, none 24.9+3.1 p=0.001	SUI 2.2+1.2, POP 2+0.82, none 2.1+0.2 (p=0.84)	NI	POP	Collagen type 1
Liapis et al. 2001	SUI+POP	PE	IHC	34	28	SUI and POP stage 1, by voiding and filling cystometry. Peak flow rate	No hormonal replacement therapy	Detrusor instability, previous operations for the management of urinary incontinence or anterior vaginal wall prolapse	POP stage 1 or no POP and no SUI	Paravaginal fascia and uterosacral ligaments	SUI+POP 54.4+/- 7.1, POP 55.4 +/- 7.4, control 53.6 +/- 6.7	SUI+POP 28.5+/-2.6, POP 24.6 +/- 3.9, control 23.5 +/-3.4	SUI+POP 2.4+/-1.2, POP 2.5+/-1.1, control 2.3 +/- 1.0	SUI+POP 16/34 premenopausal, POP 15/32 premenopausal, control 10/28 premenopausal	POP	Collagen type 3
Chen et al. 2002	SUI+POP	GE and PE	QC-RT-PCR, spectrophotometry and Ryan and Woessner, Pyrilinks	7	15	SUI and POP maximum stage 2 by medical history, pelvic exam, positive cough test and urodynamics	All postmenopausal had ERT >3 months	Degenerating fibroids, pelvic inflammatory disease or malignancies	Continent, hysterectomy for benign conditions, max POP stage 1	Anterior vaginal wall	SUI mean 63 (range 54-75), control 47 (24-75)	NI	SUI mean 2 range 0-5, control mean 2 range 0-4	Additionally, when menopausal status was matched between the two grops, MMP and TIMP mRNA expression reflected the same consistent pattern.	NI	Genes: MMP-1, MMP-2, MMP-3, MMP-9, and TIMP-1, TIMP-2 and TIMP-3. Proteins: collagen (hydroxyproline), pyridinoline crosslinks
Chen et al. 2003a	SUI	PE	WB	4	3	SUI urodynamically confirmed	NI	NI	Continent	Periurethral vaginal wall	SUI mean 48 (43-56), control 44 (43-44)	SUI 27.0 (20.7 -33.6), control 29.6 (28.5-31.3)	SUI 2 (2-3), control 1 (0-3)	All premenopausal	NI	MMP-1, TIMP-1
Chen et al. 2003b	SUI	GE	QC-PCR and microarray	5	5	women who underwent surgery for SUI, maximum POP stage 1, in proliferative phase of mentstrual cycle	NI	NI	Benign gynaecologic conditions (who needed surgery), max pop 1, in proliferative phase of mentstrual cycle	Periurethral vaginal mucosa (both control and SUI, n=11), uterosacral ligament (SUI, as comparison. N=6, but 5 were used for Q-PCR)	SUI average 46.6 (range 35-54), control 45.8 (45-49) p0.90	SUI 27.1 vs control 23.7 (p0.19)	SUI 2.2 vs. Control 1.2 (p0.71)	All premenopausal	NI	PCR: TIMP-1, ESR-A. Microarray: 90 candidate genes (62 upregulated and 28 downregulated, Table II)
Cor et al. 2003	SUI	PE	IHC and histology	30	24	SUI was confirmed by a 1 h pad test and urodynamic measurement performed by ICS standard. Patients that had obvious leakage of urine on cough provocation were classified as stress-incontinent.	NI	Previous operations for the management of urinary incontinence or anterior vaginal prolapse, no clinically determined paravaginal defects	Negative history of incontinence, 1h pad test, pelvic surgery due to benign gynaecological disorders (e.g.minor myomas)	Endopelvic fascia at the level of the bladder neck	SUI mean 42.8 (range 27-52) vs control 43.9 (30-52) (NS)	NI	All had had two deliveries except two patients (one with one and one with three deliveries). NS	NI	No POP, SUI had more urethral mobility	Elastin and collagen type 1 and 3
Lang et al. 2003	SUI+POP	PE	Enzyme immunoassay, IHC	16	20	10 cases of mild SUI with first- to third-degree uterine prolapse, and 6 cases of moderate SUI with second- to third-degree uterine prolapse. Defined by medical history, gynecologic examination, stress test, Bonney test, and urodynamic examination	No hormonal therapy	Urge incontinence, signs of urinary infection or estrogen-related diseases (endometriosis, myoma, or functional ovary tumor)	None of the women in the control group showed any signs of POP or urinary incontinence.	Peripheral blood, cardinal and uterosacral ligament	SUI 63.81+/- 7.09 vs. Control 62.10 +/- 6.41 vs. POP 63.81 +/-7.09(NS)	SUI 24.84 +/- 2.24 vs control 24.43 +/- 3.38 vs. POP 26.17 +/- 3 (NS)	SUI 2.81 +/- 1.38 vs. Control 2.30 +/- 1.08 vs. POP 3.44 +/- 1.65 (NS)	SUI 16 postmenopausal, Control 12 premenopausal and 20 postmenopausal; POP 7 premenopausal and 18 postmenopausal. Of all postmenopausal women: SUI 12.88 +/- 8.38 years vs. Control 10.75 +/- 6.58 vs. POP 14.83 +/- 8.01 postmenopausal years	All SUI had POP, degrees mentioned	Estradiol and estrogen receptor
Bai et al. 2004	SUI	PE	WB and densitometry	6	10	SUI as main finding, need for sling operation, urodynamically confirmed	SUI 3/6 (50%) and control 6/10 (60%) used hormonal replacement therapy (NS)	Physical findings of POP	Bartholin's glands without SUI	Periurethral fascia in the inferior area of the bladder neck	SUI 60.2+/-7.2 vs. Control 58.3 +/- 4.5 (NS)	SUI 24.0 +/- 1.7 vs. 25.9 +/- 3.0 (NS)	SUI 3.3+/-1.4 vs. Control 3.0 +/- 0.7 (NS)	All postmenopausal	No POP	p53, estrogen receptor, progesteron receptor
Bakas et al. 2004	SUI	GE and PE	Densitometry, RT-PCR	42	26	Genuin stress incontinence and anterior wall prolapse stage 1 or less	No hormonal replacement therapy	Previous operation in the pelvic floor, urge incontinence or mixed incontinence, maximum urethral closure pressure <20 cm H2O	Anterior wall prolapse stage 1 or less without stress incontinence	Pubocervical fascia at the level of bladder neck	SUI 43 +/- 8.2 vs. Control 44.1 +/- 7.7 (NS)	SUI 28.4 +/- 3.8 vs. Control 27.5 +/- 3.6 (NS)	SUI 2.5 +/- 1.2 vs. Control 2.3 +/- 1.1 (NS)	All premenopausal	Max POP stage 1	(pro)Collagen type 1 and 3
Busacchi et al. 2004	SUI+POP	PE	IHC	10	10	Positive stress test with a stable full bladder	No hormonal therapy	Primary or secondary (due to diabetes mellitus or other endocrine or metabolic abnormalities) central and/or peripheral nervous system diseases, detrusor instability or urethral sphincter weakness, possible peripheral neurologic disease	Withtout prolapse or malignant disease, No evidence of genital prolapse or urinary incontinence was present. E.g. bleeding uterine fibromatosis	Periurethral and perirectal pubococcygeus muscle on the right and left sides	SUI+ POP unknown (POP overall 64.8 +/- 8.7), menopausal age 11.4 +/-6.6, control 61.6 +/- 10.4 years; menopausal age 8.8 +/- 4.9 years (NS)	SUI+POP unknown, POP overall 24.6, controls 24.8 (NS)	SUI+POP unknown, POP overall 2.2 +/- 1.08, control 1.5 +/- 0.85 p=0.049	All postmenopausal	NI	Neuron specific enolase, Neuropeptide Y, vasoactive intestinal polypeptide, substance P, protein s-100 (glial marker)
Chen et al. 2004a	SUI+POP	PE	Histochemistry,Radiolabelled 2,3-3H-proline. Liquid scintillation counting (LSC). Electrophoresis, LSC.	14	12	Hypermobile SUI, postmenopausal, in good general health, and undergoing bladder neck suspension surgery, distinguished by history, physical examination, and videourodynamic studies, urinary loss during an increase in abdominal pressure in the absence of a rise in net detrusor pressure.	NI	OAB, evidence of osteoporosis, rheumatoid arthritis, Paget’s disease, hyperparathyroidism, or hyperthyroidism	Continent women without evidence of pelvic floor weakening undergoing abdominal or laparoscopic-assisted vaginal hysterectomy for symptomatic uterine fibroids, endometrial cancer, or benign ovarian pathology	Biopsies of the lower abdominal skin and endopelvic fascia	SUI 52-80 years old (mean = 65), control 50-78 years old (mean =57).	NI	NI	All postmenopausal	See exclusion criteria	Collagen a1(III)/a1(I) synthesis, (%) of total collagen synthesis
Chen et al. 2004b	SUI+POP	GE and PE	RT-PCR, WB, QC-PCR	12	15	Undergoing surgery for urinary incontinence and prolapse with pelvic organ prolapse equal to or greater than stage II by POP-Q	NI	History of endometriosis, gynecologic malignancies, pelvic in£ammatory conditions, connective tissue disorders, emphysema, and prior pelvic surgery	Continent women with POP-Q of stage I or lower	Peri-urethral vaginal wall	Average SUI/pop 45.9 (range 31-57), vs control 44.6 (36-51) p=0.56	SUI/pop average (25.9 (19.5-35.6) vs. Control 28.1 (20.7-36.6) p=0.29	SUI/pop average 2.4 (0-6), control 1.2 (0-5) p=0.05	All premenopausal	POP	Elastase activity, human neutrophil elastase, cathepsin K, and alpha-1 antitrypsin (a serine protease inhibitor) mRNA and protein levels
Kushner et al. 2004	SUI	PE	ELISA, competitive enzyme immunoassay	23	39	Hypermobile SUI, in good general health, diagnosed by by history, physical examination, and videourodynamic studies . Definition: urinary loss during an increase in abdominal pressure in the absence of a rise in net detrusor pressure	NI	Osteoporosis, rheumatoid arthritis, Paget’s disease, hyperparathyroidism, or hyperthyroidism	Women without urinary tract symptoms and no evidence of genital prolapse	24h urine	SUI mean age 57.6, control 47.4	NI	NI	NI	No comorbidity	Pyridinium (PYD)/Cr, helical peptide a1 (I) 620-622, derived from collagen
Zhu et al. 2004	SUI+POP	PE	IHC	14	10	SUI by gynecologic examination, 1-h pad test, urine culture and urodynamic examination, and POP (varying degrees of cystocele)	No hormons within 3 months before the study	NI	NO SUI or POP, estrogen-related diseases such as endometriosis, myoma, and functional ovary tumor	Tissue around levator ani muscle (connective tissue, smooth muscle, nerve fibers)	SUI (49.64 +/- 12.88, vs control 49.70 +/- 9.19 (NS)	SUI 25.18 +/- 2.12 vs. Control 27.22 +/- 3.49 (NS)	SUI1.79 +/- 1.19 vs. Control 1.90 +/- 1.29 (NS)	NS difference in postmenopausal time, all postmenopausal	POP	Estrogen receptor
Edwall et al. 2005	SUI	PE	Radioimmunoassay	31	31	SUI by urodynamic investigation and controlled provocationwith 300 ml saline in the bladder according to the ICS	Control women with fibroids had no endocrine treatment for diseases, SUI matched 2 pts had local exogenous estrogens (weak), and 11 HRT. Controls 1 weak HRT, 11 strong HRT, NS differences between SUI matched, not matched and control	Malignant disease, diseases needing systemic glucocorticoid treatment, bisphosphonate-treated osteoporosis, and severe systemic diseases in general (cardiovascular, gastrointestinal, hepatobiliary, kidney, respiratory, and neurological disease), prolapse or surgical correction of prolapse	No history of SUI or urge incontinence when interviewed and proved urologically healthy in a simple cough provocation test with full bladder according to bladder scanning	Suburethral tissue, venous blood samples	SUI not matched 60.2+/- 13.4, SUI matched 52.3 +/- 10.7, control 51.3 +/- 5.1 (not matched vs control p<0.01)	SUI not matched: 26.3 +/- 3.7, SUI matched, 25.3 +/- 4.0, control 24.6 +/- 3.5 (SUI not matched vs control p<0.05), matched NS.	SUI not matched 2.1 (0-6), matched 2.3 (0-6), control 1.8 (0-5) NS differences	SUI 15 pre and 16 postmenopausal, controls 15 pre and 16 postmenopausal, matched group	See exclusion criteria	Collagen markers (PICP: arboxyterminal propeptide of type I procollagen, PIIINP: amino-terminal propeptide of procollagen III, ICTP: carboxyterminal telopeptide of type I collagen
Radziszewski et al. 2005	SUI	PE	Immunofluorescence	10	8	SUI by history, urogynecological examination, 1-h pad test and a urodynamic examination comprising filling cystometry, pressureflow study and Valsalva leak-point pressure measurement, definition: urinary leakage during stress, proved in objective conditions by urodynamics, Valsalva leak-point pressure and pad test	No hormonal replacement therapy	Mixed (i.e., stress and urge) or urge incontinence, as well as patients with prolapse stage greater than II, patients with recurrent stress incontinence and patients with previous prolapse surgery, systematic disease presumed to alter connective tissue metabolism (e.g., lupus, rheumatic disease, diabetes), patients on systemic and topical steroids (including hormone replacement therapy) and patie…	Age-matched patients without any form of incontinence (as verified by patient’s history, cough test and results of 1-h pad test) and without prolapse stage greater than II, undergoing surgery within the small pelvis,	Arcus tendineus fasciae pelvis (ATFP) and rectus muscle external fascia (RMEF)	SUI mean age (61.2 +/- 9,2), controls 65.8+/-5.1 NS	SUI 28.35 +/- 2.2 vs. Control 23.41 +/- 2.4 NS	SUI 2.6 +/- 1.5 vs. Control 1.9 +/- 1.2 NS	All postmenopausal	See exclusion criteria	Collagen VII
Chen et al. 2006	SUI	GE and PE	Microarray, RT-PCR, WB, QC-PCR, immunofluorescence	17	19	SUI and POP <stage 1, all in secretory phase of menses, urodynamically proven	NI	History of endometriosis, gynaecological malignancies, pelvic inflammatory conditions, connective tissue disorders, emphysema and prior pelvic surgery	Continent women no greater than stage I POP, all in secretory phase of menses	Periurethral vaginal wall	SUI average (42.9 (range 24-57), control 43.2 (36-52) p=0.92	SUI 26.8 (21-36.6), vs. Control 27.8 (19.8-61.2) p=0.68	SUI 2.1 (0-6) vs. Control 1.2 (0-4) p=0.12	All premenopausal, all in secretory phase of menses	NI	Whole transcriptome (1 000 000 unique features and covering more than 39 000 transcript variants representing 33 000genes), RT-PCR and WB of elafin, IL-1 receptor antagonist (IL-1RA), and receptor (calcitonin) activity-modifying protein 1 (RAMP-1)
Skorupski et al. 2006	SUI+POP	GV	2-step PCR	50	50	Medical history; the results of a cough test; assessment of lower urinary tract symptoms; and UDO consisting of uroflowmetry, cystometry, abdominal leak-point pressure measurement, and profilometry. Definition: appearance of any incontinence episodes induced by increased intraabdominal pressure (history, urodynamics) and a positive cough test	NI	Hysterectomized women, patients with neurological disorders, immobile patients, or those presenting symptoms suggesting mixed or urge urinary incontinence	Benign gynecologic conditions (myomas) max POP stage 1	Blood	SUI mean 53.4 (SD 10.2), vs control 52.7 (12.4) p=0.9	SUI 28.0+/-4.8 vs. Control 26.6 +/- 4.6 P=0.1	Median SUI 2 (range 0-7), vs. Control 2 (0-5), p=0.3	SUI 24 pre, 26 post, control 27 pre, 23 post, p=0.5	SUI POP 0=2 pop 1=32, pop 2=11, pop 3=5, control pop0=7, pop1=43, verder 0, p=0.002	COL1A1 polymorphism of the SP1-binding site (G-->T)
Wen et al. 2006	SUI	GE and PE	RT-PCR, IHC, ELISA, WB, immunofluorescence	19	17	SUI	NI	History of endometriosis, gynaecologic malignancies, pelvic inflammatory conditions, connective tissue disorders, emphysema, prior pelvic surgery, advanced pelvic organ prolapse (greater than stage II by the pelvic organ prolapse quantification system) and menopausal symptoms	Asymptomatic controls	Periurethral vaginal wall	Age-matched, numbers not provided	NI	NI	All premenopausal	NI	Transforming growth factor (TGF-b1), latent transforming factor-binding proteins (LTBP-1, LTBP-2) and elastin microfibril components (fibrillin-1 and fibrillin-2)
Chen et al. 2007	SUI	GE and PE	Spectrophotometry, RT-PCR, WB	22	27	Undergoing surgery for SUI, urodynamically proven	NI	Endometriosis, gynecologic malignancies, pelvic inflammatory conditions, connective tissue disorders, emphysema, prior pelvic surgery, and advanced pelvic organ prolapse (greater than stage II by POP-Q)	Negative history of SUI in the past 12 months, and no previous treatment for SUI or symptoms of frequency or urgency lasting more than 3 months.	Periurethral vaginal wall	Proliferative: SUI 46 (36-56), vs. Control 48 (38-57) p= 0.944 (mean/median,range?). Secretory: SUI 45 (33-54), vs. Control 44 (31-50) p= 0.736 (mean/median,range?)	Proliferative: SUI 28.6 (21-37.8), vs control 27.5 (19.8-60.2), p 0.706 (mean? Range?). Secretory: SUI 25.9 (22.3-35.6), vs. Control 24.5 (20-31.7) p= 0.504 (mean? Range?)	Proliferative: SUI 2 (0-6), vs control 1.6 (0-6), p 0.253 (mean? Range?). Secretory: SUI 2 (1-4), vs. Control 1 (0-2) p= 0.039 (mean? Range?)	All premenopausal, both the proliferative and secretory phases of the menstrual cycle	NI	Neutrophil elastase and matrix metalloproteinase activities. Elastase inhibitor Alpha-1 Antitrypsin. Total elastin and total collagen (hydroxyproline). Elastase activity
Edwall et al.2007	SUI	PE	Radioimmunoassay	30	30	Urodynamically proven SUI, All SUI patients had a severe incontinence (20 g leakage per hour)	HRT equally divided between both groups. No endocrine treatment for fibroids patients	Malignant disease, diseases needing systemic glucocorticoid treatment, bisphosphonate-treated osteoporosis, and severe systemic diseases in general (cardiovascular, gastrointestinal, hepatobiliary, kidney, respiratory, and neurological disease), presenting with urogenital prolapse or who had undergone surgical correction of prolapse	No history of SUI or urge incontinence when interviewed and proved continent in a simple cough provocation test with spontaneously filled bladder checked by bladder scanning or ultra sound	Peripheral blood and suburethral	SUI (matched) 52.6 +/-11.6, vs, control 51.0 +/- 6.1 (NS)	SUI (matched) 25.8 (20.1-36.8), vs. Controls 24.7 (20.5-35.1) NS	SUI (matched) 2 (0-3), controls 1.8 (0-5) NS	3/30 controls vs 4/30 matched SUI (NS)	NI	Carboxy-terminal propeptide of type I procollagen (PICP), carboxy-terminal telopeptide of type I collagen (ICTP), amino-terminal propeptide of procollagen III (PIIINP) (all in urogenital tissue homogenates), estradiol-17b (E2), total testosterone (T), and sex-hormone-binding globulin (SHBG) in peripheral blood serum. Apparent concentrations of free testosterone (fT) were calculated from T, SHBG a…
Soderberg et al.2007	SUI	GE and PE	IHC, RT-PCR	14	10	SUI	IHC SUI postmenopausal 7/8 vs control 2/5, PCR. SUI pre 2/7 , control pre 0/5, SUI post 4/7, control post 2/5	POP	Other benign gynaecological disorders	Para-urethral	IHC SUI pre mean 43(39-52), control pre 40(32-50), sui post 62(57-66), control post 58 (56-60), PCR SUI pre 40.7 (35-44), control pre 46.8 (45-50), sui post 60.7 (52-72), control post 58 (56-60) not likely significantly different due to low numbers but not mentioned	NI	IHC SUI pre 2.0 (1-3), control pre 1.7 (0-3), sui post 2.1(1-3), control post 1.6(0-4), PCR SUI pre 1.7 (0-3), control pre 1.6 (0-3), sui post 2.3 (1-3), control post 1.6 (0-4)	IHC SUI 4pre/8 post, control 6 pre/5 post. PCR SUI 7 pre/7 post, control 5 pre/5post	NI	ESR1 and ESR2, progesteronreceptor (PR(A+B) and PRB) and androgenreceptor (AR)
Song et al. 2007	SUI+POP*	GE and PE	IHC and RT-PCR	13	12	SUI was defined by gynecologic examination, pad test, and urodynamic examination according to the ICS standard	No estrogen	Previous operation for urinary incontinence or anterior vaginal prolapse were excluded from the study. Patients who had used estrogen in the previous 3 months were not included either	Premenopausal women who underwent hysterectomy for benign conditions	Anterior vaginal wall at the level of the bladder neck	Collagen SUI: 43.2+/-6.2 vs. Control. 44.3+/- 4.2 (p0.6116), decorin SUI+prolapse 54.7+/-16.4 vs. Control 41.0+/- 3.1 (p0.065)	SUI 23.9+/-3.8 vs. Control 24.3+/-3.2 p0.7794), SUI+POP NI?	Collagen SUI 2.3+/-1.2 vs. Control 2.4+/- 1.2 P=1.4771, decorin SUI+POP 2.6+/-0.9 vs. 2.0+/-0.6 p0.289	Collagen all premenopausal, decorin SUI +POP 4pre, 2 post, control all premenopausal	NI	Collagen type 3 and decorin
Suzme et al. 2007	SUI+POP	PE	Histology, spectophotometry, ELISA, radioimmunoassay	14	12	Women with both incontinence and prolapse	No hormonal replacement therapy	Hormonal replacement therapy or pelvic malignancies.	Continent women without prolapse in whom a hysterectomy was performed abdominally for benign uterine diseases	Uterosacral ligaments and serum	Matched (number per group not provided)= median 52; range 45-64	Matched (number per group not provided)= median: 30; range 26-35	Matched (number per group not provided) = 3 births	All postmenopausal	NI	Collagen fibers, hydroxyproline, t-Hx, GAGs, TGF-B1, leptin, PINP, PIINP
Trabucco et al. 2007	SUI	PE	IHC	16	16	SUI defined by an experienced uro-gynecologist from patients history, physical examination, urinalysis, frequency/volume bladder chart, evaluation of residual bladder volume, medium fill cystometry, urethral pressure profile measurement at rest and during stress and a clinical stress test in the supine and standing position. The criterion for a diagnosis of SUI is urinary loss during an increase …	No hormonal replacement therapy	Previous surgical treatment for urinary incontinence or pelvic organ prolapse, history of endometriosis, gynaecologic malignancies, pelvic inflammatory conditions, connective tissue disorders, emphysema, and prior pelvic surgery	No symptoms of incontinence and underwent surgery for benign reasons such as myomas, irregular, immense or postmenopausal vaginal bleedings, and benign ovarian cysts	Peri-urethral	SUI pre 40.5, control pre 39.5, SUI post 63, control post 62	NI	SUI pre mean 2 (1-4), control pre 1,25 (1-2), SUI post 1,75 (1-3), control post 1.75 (1-4)	Half premenopausal half postmenopausal	Six of the women classified in the incontinent group had an associated pelvic organ prolapse equal to or greater than stage II by POP-Q.	Collagen type 1, fibromodulin and lumican
Wen et al. 2007	SUI	GE and PE	RT-PCR, IHC, immunofluorescence and WB	31	31	Women undergoing surgery for SUI	NI	History of endometriosis, gynaecologic malignancies, pelvic inflammatory conditions, connective tissue disorders, emphysema, prior pelvic surgery and advanced pelvic organ prolapse (greater than stage II by POP-Q)	Asymptomatic control women undergoing benign gynaecologic surgeries for fibroids, dysfunctional bleeding and ovarian cysts	Peri-urethral vaginal mucosa	SUI prolif 35-54), SUI secr 30-53), control prolif 36-54), secr 30-49) significance not mentioned	NI	NI	All premenopausal, both the proliferative and secretory phases of the menstrual cycle	NI	Proteoglycans biglycan (BGN), decorin (DCN) and fibromodulin (FMOD)
Xie et al. 2007	SUI	PE	IHC	31	26	Definition of SUI follows the recommendation of the ICS and the diagnosis was made according to this criterion, diagnosed objectively by a combination of medical history, gynecological examination, stress test, ultrasonography, and urodynamic examination, including POPQ test	No hormonal therapy	Receiving hormonal therapy within the previous three months, signs of urinary infection, estrogenrelated diseases (endometriosis, myoma, or functional ovary tumor), clear clinical evidence of POP (POPQ stage <1), and urge incontinence	Women with vaginal wall cysts or uterine cervix cancer, but definitely without SUI or pelvic organ prolapse	Serum and anterior vaginal wall, 1–2 cm from the uterine cervix, and mucosa, submucosa, connective tissue, and smooth muscle	SUI pre 51.0+/-4.3 vs. Control 48.3+/-2.7 p>0.05, SUI post 65.0+/-8.0 vs. Control 60.1+/-4.6 p>0.05	SUI premenopausal 24.3+/-2.9 vs. Control 24.1+/- 3.5 P>0.05, SUI postmenopausal 24.1+/-4.3 vs. Control 22.9+/-3.1 p>0.05	SUI re 2.5+/-1.2 vs. Control 1.7+/-0.8 p>0.05, SUI post 3.3+/-2.0 vs. Control 2.6+/-1.0 p>0.05	SUI 12pre/19post, control 12 pre/14 post, menstrual phase no significant differences	NI	ER-a and ER-b, and estradiol
Hong et al. 2008	SUI+POP	PE	IHC and radioimmunoassay	17	20	Patients’ history, gynecologic examination, pad test, and urodynamic examination according to the International Continent Society Standard. Only those with moderate or severe SUI were enrolled, accompanied by mild or moderate anterior vaginal prolapse	NI	Previous operation for urinary incontinence or anterior vaginal prolapse or the usage of estrogen in the latest 3 months were excluded from the study. Endometriosis, functional ovarian tumor, and genital or urinary infections.	Benign gynecological conditions without either SUI or POP history, symptoms, and related abnormal gynecological examination records, and were operated on by intravaginal panhysterectomy.	Upper anterior vaginal wall at the bladder neck level	Premenopausal SUI 46.3+/- 2.6 vs. Control 43.8+/- 4.9 NS, postmenopausal SUI 56.6+/- 5.6 vs. Control 57.3 +/- 4.1 NS	premenopausal SUI 23.2 +/- 2.1 vs. Control 23.5+/- 1.5 NS, postmenopausal SUI 24.8 +/- 2.8 vs. Control 23.0 +/- 2.2 NS	Premenopausal SUI 2.9 +/- 0.8 vs. Control 2.0 +/- 1.0 NS, postmenopausal SUI 2.9 +/- 0.6 vs. Control 2.9 +/- 0.7 NS	Premenopausal SUI 8, postmenopausal SUI 9, premenopausal control 10, postmenopausal control 10 NS difference in postmenopausal duration between SUI and control	NI	Vasoactive intestinal peptide (VIP), Pituitary adenylate cyclase activating polypeptide-38 (PACAP)
Wen et al. 2008b	SUI	GE and PE	WB, ELISA and RT-PCR, QuantiCleave Protease Assay Kit, IHC, immunofluorescence staining.	28	29	Women undergoing surgery for SUI	NI	History of endometriosis, gynecologic malignancies, pelvic inflammatory conditions, connective tissue disorders, emphysema, prior pelvic surgery and advanced pelvic organ prolapse (greater than stage II by pelvic organ prolapse-quantification)	Undergoing benign gynecologic surgeries for fibroids, dysfunctional bleeding or ovarian cysts.	Full-thickness, peri-urethral vaginal mucosa	Proliferative phase SUI (N=14) mean43.2+/- 1.6 vs. Controls (N=14) 45.6+/- 1.4, secretory phase SUI (n=14) 45.6+/-1.2) vs. control 42.7+/- 1.0 NS	NI	NS differences (numbers not provided)	All premenopausal, both the proliferative and secretory phases of the menstrual cycle	NI	a2-macroglobulin (a2-M)
Zhu et al. 2008	SUI+POP	GE and PE	IHC and DNA hybridization	13	13	Genuine SUI was established by the demonstration of a positive stress test with a stable full bladder. Every patient with SUI also had incidental POP (all with mild cystocele)	None of the patients had taken hormones in the 3 months prior to surgery.	Exclusion criteria for the control group were genital prolapse, urinary incontinence, or any estrogen-related disease (endometriosis, myoma, or functional ovarian tumor). nPatients had no cases of detrusor instability or urethral sphincter weakness (maximal urethral closure pressure less than 30 cm H2O).	Cervical intraepithelial neoplasia grade III (CIN III) or carcinoma in situ (CIS) and postmenopausal ovarian cyst	Biopsy specimens of the anterior and posterior vaginal wall near the fornix	SUI+POP 55.85+/- 3.10 vs. Control 56.38 +/- 3.76 p=0.968	SUI+POP 24.76 +/- 1.23 vs. Control 25.81 +/- 1.96, p=0.234	SUI+POP 2.38+/- 0.69 vs. Controls 2.15 +/- 0.82, p=0.714	All postmenopausal, time postmenopause NS different	All women with SUI had mild POP	Neuropeptide Y (NPY)
Zhu et al. 2009***	SUI+POP	PE	IHC	13	13	SUI was defined objectively by gynecologic examination and urodynamic examination, Among the 13 women with SUI, 9 had moderate SUI, and 4 had severe SUI. Every patient with SUI also had POP.	None of the patients took hormonal drugs during the 3 months prior to surgery	Exclusions for the control group: estrogen-related diseases (endometriosis, myoma, and functional ovary tumors).	Cervical intraepithelial neoplasia (CIN) grade 3/cervical carcinoma in situ and postmenopausal ovarian cyst.	Anterior and posterior vaginal walls near the fornix	SUI+POP 55.85+/- 3.10 vs. Control 56.38 +/- 3.76 p=0.968	SUI+POP 24.76 +/- 1.23 vs. Control 25.81 +/- 1.96, p=0.234	SUI+POP 2.38+/- 0.69 vs. Controls 2.15 +/- 0.82, p=0.714	All postmenopausal, time postmenopause NS different	All women with SUI had POP	Vasoactive intestinal peptide (VIP)
Athanasiou et al. 2010	SUI+POP	PE	Two-dimensional electrophoresis (2-DE) and mass spectrometry (MS) and WB	4	3	POP and SUI who had been referred to a tertiary urogynecology department for surgical treatment. Based on questionnaire, vaginal exam, POP-Q, urodynamic studies	NI	Endometriosis or malignancy	Asymptomatic women with normal pelvic support who were planning to undergo a hysterectomy for benign gynecological conditions (one for menorrhagia without fibroids and two for benign ovarian mass), based on stress tests with a full bladder and a pad test were negative, and uroflowmetry with measurement of postmicturition residual volume	Full-thickness biopsies of the pubocervical fascia	SUI+POP 62.5 (55-69), control 54 (47-59) means, significantly different	NI	SUI+POP 2 (1-3), vs. Control 1.7 +/- 1-2) NS	All postmenopausal	Matched for smoking	Whole proteome
Skorupski et al. 2010	SUI +POP	GV	RFLP	155	111	Reporting SUI, defined as urinary leakage with increasing abdominal pressure and clinically significant POP (>2or more)	NI	Other types of UI, history of pelvic floor disorder surgery	Without POP or symptoms of urinary incontinence. Hospitalized due to abnormal uterine bleeding or fibroids.	Whole blood	NS numbers not provided	NI	NI	All postmenopausal. NS difference between groups	NI	G/GG polymorphism of 1607/1608 site of matrix metalloproteinase type 1 (MMP-1) and 5A/6A polymrphism of the 1616/1617 site of MMP-3
Soderberg et al. 2010	SUI	GE and PE	IHC and RT-PCR	24	14	Women with surgery demanding SUI, TVT procedure	NI	POP (from stage 2)	Undergoing gynecological surgery for other benign conditions	Para-urethral	SUI pre 41.8 (35–53)SUI post 58.8 (52–72), SUI combined 50.3 (35–72), contr pre 45.9 (39–54) and post 58.7 (56–65), all controls 51.4 (39–65)	NI	SUI mean parity 2.2 (0–3), controls 2.1 (0–4)	SUI 12/12, controls 8premenopausal/6postmenopausal	No POP	Collagen I, collagen III, decorin, fibromodulin, lumican, fibrillin-1, and fibulin-5
Tong et al. 2010	SUI	GE and PE	microarray, RT-PCR, and IHC	9	8	SUI and max POP stage 1	No hormone replacement and dietary supplement with hormone activity as well as vaginal hormone	POP, history of endometriosis, gynecological malignancies, pelvic inflammatory conditions, connective tissue disorders, chronic disease, and prior pelvic or vaginal surgery	Undergoing benign gynecological surgery (cervical lesions, vaginal Gartner’ cysts)	Full-thickness, periurethral vaginal wall	SUI mean 60.11+/- SD 6.21, vs. Control 59.25 +/- 6.27, p=0.78	SUI 25.45+/- 2.09 vs. Control 25.6 1+/- 4.68 p=0.93	SUI 1.56 +/- 1.73 vs. Control 1.87 +/- 1.71 p=0.64	All postmenopausal NS difference in period of postmenopause	NI	Transciptome (54,676 transcript variants and containing 13,825 genes)
Wu et al. 2010	SUI	GE and PE	semiquantitative competitiveRT-PCR and WB	39	31	SUI undergoing surgery, based on medical history, gynecological examination, stress test, ultrasonography, urodynamic examination, and POP-Q. The diagnosis was made according to the recommendation of the ICS	NI	Signs of urinary infection, clear clinical evidence of POP (POPQ stage>1), urge incontinence, and previous vaginal surgery	Vaginal wall cysts (excluding the anterior wall cysts), without SUI or POP	Periurethral vaginal	SUI median 56, control 51 p>0.05	SUI 25.2 +/- 2.2 vs. Control 24.7 +/- 1.8 p>0.05	SUI 1.8 +/- 0.9 vs. Control 1.7 +/- 0.7 p> 0.05	SUI 92%, control 87% p> 0.05	NI	Calpain-1, calpain-2, and calpastatin
Cornu et al. 2011	SUI	GV	PCR	91	66	SUI by clinical examination (report of incontinence episodes circumstances, perineal examination, stress test, TVT and Bonney tests) and according to ICS	NI	NI	Continent women	Blood	UI in general 68.6 +/- 8.6 vs. 67.7 +/- 9.6 p=0.49 (no data on SUI)	NI	UI 1.7 +/- 1.8 vs. Control 1.5 +/- 1.3 p=0.84 no data on SUI	All postmenopausal	NI	Androgen receptor CYP-17, CYP-19, and estrogen receptor-1
Sioutis et al. 2011	SUI	GV	gel electrophoresis	45	45	Diagnosed by medical history and verified by urodynamic examination (uroflowmetry, cystometry, abdominal leak point pressure, and profilometry), according to ICS. All SUI patients had a positive (pad weight gain >2 gm) 1-hour pad test and were scheduled for operational treatment	NI	Medical history of urge or mixed type of incontinence, hysterectomy, neurological disorders, or cancer.	Healthy women who served as controls.	Blood	SUI mean 58.5 SD 5.4, control 55.8 (3.8) p=0.008	SUI 27.8 (3.3), control 25.5 (3.3) p<0.001	SUI: none 1 (2,2%), 1 delivery 5 (11.1%), >2deliveries 39 (86.7%), control none 2 (4.4%), 1 delivery 12 (26.7%), >2 deliveries 31 (68.9%), p=0.013	All postmenopausal, age at menopause NS different, years since menopause significantly different (SUI older/longer)	Smoking, alcohol and physical exercise, bone mineral density NS different	COL1A1 Sp1 polymorphism (G/T)
Hu et al. 2012	SUI+POP	PE	IHC	18	9	SUI + POP urodynamically confirmed	No estrogen drugs taken during the last 3 months	Injuries to the lumbosacral spine or brain, no estrogen drugs taken during the last 3 months, no ovarian tumors, no prior urethral and vaginal surgeries, and no endometriosis based on post-surgery pathology	Presenting with benign, non-POP and non-SUI gynecological diseases	Anterior vaginal wall below the urethra	Group 2 SUI+POP 61.80 +/- 8.05 vs. Control 58.69+/- 5.88 however no infor on all POP+SUI pts	Group 2 POP +7-% SUI 24.16 +/- 2.69 vs. Control 20.74 +/- 2.31 however no information on all POP+SUI patients	POP + 70% SUI (group 2) 2.10 +/- 0.87 vs. Control 1.22 +/- 0.44	Group 2 POP+ 70%SUI 90% vs. Control 22% however no infor on all POP+SUI pts	NI	Neuropeptide Y (NPY)
Wen et al. 2012	SUI	GE and PE	IHC, WB, RT-PCR, surface-enhanced laser desorption/ionization time-of-flight mass spectrometry (SELDI-TOF MS)	11	12	Women undergoing surgery for SUI	NI	History of endometriosis, gynecologic malignancies, pelvic inflammatory conditions, connective tissue disorders, emphysema, prior pelvic surgery and pelvic organ prolapse beyond stage 1	Continent women undergoing benign gynecologic surgeries for fibroids, dysfunctional bleeding, or ovarian cysts.	Full-thickness, peri-urethral vaginal mucosa	At least partially age matched, number not shown	NI	NI	All premenopausal both the proliferative and secretory phases	NI	Proteome
Hu et al. 2013	SUI+POP	PE	IHC and WB	26	10	Stress urinary incontinence was diagnosed by patient history, gynecologic examination, pad test, and urodynamic examination in accordance with the ICS standard	No hormonal drugs 3 months before surgery	Previous endometriosis, adenomyosis, uterine fibroids, connective tissue disorders, pelvic inflammatory conditions, or pelvic surgery.	Benign gynecological conditions but no history of POP or SUI	Biopsy specimens of the midline anterior vaginal cuff	Numbers of SUI+POP pts not given (most likely between 60-63), controls 57.34 +/- 4.26 they mention no significant differences between the POP vs controls groups (indepently of SUI)	Numbers of SUI+POP not provided but most likely not significantly different (in all the other groups between 21-24), controls 22.74 +/- 2.09. they mention no significant differences between the POP vs controls groups (indepently of SUI)	Numbers of SUI+POP patient not provided controls 1.32 +/- 0.34, the POP pts >2, they mention no significant differences between the POP vs controls groups (indepently of SUI)	Numbers of SUI+POP pts not given but most likely significantly different (87-100%) vs. Controls 20%, abstract says all postmenopausal but table shows numbers of postmenopausal women..	NI	Vasoactive intestinal peptide (VIP)
Huang et al. 2013b	SUI	PE	IHC, WB, RT-PCR	10	10	Diagnosed with SUI according to the recommendations of ICS 14 who underwent tension-free vaginal tape surgery. Diagnosed by medical history, gynaecological examination, urinary stress test, ultrasonography and urodynamic examination, including POP-Q test.	NI	Exclusion from the control group: hormone replacement therapy within the previous 3 months; signs of urinary infection; oestrogen-related disease (endometriosis, myoma or functional ovarian tumour); clear clinical evidence of POP (_x0002_grade 2); and urge incontinence.	Without SUI or pelvic organ prolapse (POP) who were undergoing intravaginal cystectomy for vaginal wall cyst or radical hysterectomy for stage I cervical cancer	Anterior vaginal wall	SUI mean 50.6 +/- 5.87, vs. Control 45.7 +/- 5.10, NS	SUI 21.71+/- 4.13 vs. Cotrol 19.68 +/- 5.71, NS	SUI 1.6 +/- 0.7 vs. Control 1.8 +/- 0.79, NS	NI	NI	ERK1/2
Ozbek et al. 2013	SUI	GV	PCR and RFLP	94	87	Pure SUI, diagnosed based on medical history, the results of a cough stress test, and two validated symptom-impact questionnaires: the urogenital distress inventory and the incontinence impact questionnaire	NI	Severe cystocele and rectocele, urge incontinence and neurogenic bladder dysfunction, known connective tissue disorders (such as Marfan syndrome and Ehlers–Danlos syndrome), ongoing pregnancy, or cancer involving reproductive or pelvic organs	No incontinence symptoms	Blood	SUI (N=93?) mean 49.2 +/- 5.7, vs. Control 48.4 +/- 6.1 p=0.404	SUI (N=93?) 30.4 +/- 3.4 vs. Control 29.9 +/- 3.9 p=0.136	Median SUI 2(1-9) vs. Control 2 (1-7) p=0.074	SUI N27 =27.9% vs. Control 20 =26.7%) p=0.990	NI	LOX-L1’s rs1048661, G > T, pArg141Leu, Exon-1 SmaI; rs3825942, C > T, pGly153Asp, Hinf-1 and rs2165241, C > T, I˙ntron-1 BsrI regions
Han et al. 2014	SUI+POP	PE	IHC and electronmicroscopy	30	30	SUI and POP according to medical history, examination results, pressure tests and urodynamic inspection	Hormone drugs for almost 3 months	NI	Dysfunctional uterine bleeding, uterine myoma or endometrial premalignant lesions comprised	Cardinal ligaments, uterosacral ligaments and paraurethral	SUI+POP median 63.24 +/- 4.84 vs. Control 60.52 +/- 6.58 NS	SUI+POP 25.66+/- 3.56 vs. Control 24.82+/- 4.32 NS	SUI+POP 3.75+/- 0.68, vs. Control 1.83 +/- 0.92, P<0.05	NI	No ectopic endometrium, uterine fibroids and ovarian function of estrogen-associated diseases, including cancer.	Collagen type 1 and 3
Liu et al. 2014	SUI	GE and PE	microarray, RT-PCR, WB	13	13	Undergoing surgical operation for SUI	Not taking hormone therapy	Endometriosis, gynecologic malignancies, connective tissue disorders, prior pelvic surgical operation, and advanced pelvic organ prolapse (higher than stage II)	No SUI	Periurethral vaginal wall	SUI 60 (2.1), vs. Control 63 (2.0) p0.457	SUI 29.6 +/- 3.12, vs. Control 30.1 +/- 2.92 p=0.332	SUI 2.3 +/-0.85 vs. Control 2.3 +/-0.97 p=0.273	All postmenopausal, no significant differences is duration p=0.162	All vaginal labor, birthweight comparable	Transciptome miRNA's
Koch et al. 2016	SUI	PE	highperformance liquid chromatography separation and tandem mass spectrometry detection	20	20	SUI: history of symptoms of SUI for at least 3 months (including a specific history of the complaint of involuntary leakage on effort or exertion or on sneezing or coughing), a positive provocation stress test (defined as an observed transurethral loss ofurine simultaneous with a cough or Valsalva maneuver at a bladder volume of 300 ml), negative urine dipstick testing, age≥18 years, patients cap…	NI	Previous treatment for SUI (surgical or pharmacological), a history of overactive bladder symptoms and/or urinary incontinence other than SUI (tested using the ICIQ short form questionnaire) [16]; neurological disorders potentially affecting the urinary tract system, such as multiple sclerosis, Parkinson’s disease; pelvic organ prolapse stage ≥ II (International Continence Society classification)…	Healthy age-matched control, identical criteria but no symptomatic SUI, ICIQ equal to 0 and negative cough test.	Urine (and blood to verify)	SUI 49 +/-9), control 49 +/- 10 p=0.961	SUI 28 +/- 6 control 25 +/- 5 p=0.119	Vaginal deliveries SUI 2.1 +/- 0.9 vs. Control 1.9 +/- 0.7 p=0.462	SUI 15 premenopausal 5 postmenopausal, control 12 premenopausal 8 postmenopausal, p=0.501	See exclusion criteria, chronic diseases SUI 10, control 11 p=0.752	Urinary proteome
Ozbek et al. 2016	SUI	PE	ELISA	116	76	Positive answer to the question “During the past 12 months, have you leaked or lost control of even a small amount of urine with activity like coughing, lifting, or exercise?” defined SUI and gynecologic position and we determined cough stress test, The urodynamic study was used in patients with symptoms of mixed urinary incontinence and in cases of clinically suspicious diagnosis.	NI	Urge incontinence, mixed urinary incontinence with dominant urge component, intrinsic sphincter deficiency, neurogenic bladder (multiple sclerosis, meningomyelocele, spinal cord injury), genital surgery history, severe mental illness and severe physical handicap. Patients who were pregnant were excluded.	No incontinence at all	Serum	SUI 49.9 +/- 8.6 vs. Control 48.7 +/- 7.8 p=0.08	SUI 29.8 +/- 5.7 vs. Control 27.3 +/- 4.3 p< 0.001	SUI 3.1 +/- 1.4 vs. 2.9 +/- 1.1 p=0.06	SUI 65 postmenopausal/51 premenopausal, control 40 postmenopausal, 36 pre menopausal	Diabetes mellitus SUI 29, control 25, p=0.15	Insulin-like growth factor 1 (IGF-1)
Pantatosakis et al. 2016	SUI	PE	IHC	28	30	SUI who underwent surgery therapy with tension-free vaginal tape. Definition of SUI was according to criteria of ICS	No hormonal therapy	Hormone therapy, history of pelvic inflammatory disease, malignancy or previous surgical procedures	Women without SUI who underwent surgery for benign disease, like hysterectomy for leiomyomas	Biopsy specimens from the anterior vaginal wall	SUI mean SD 62.6 +/- 4.2, vs. Control 61.5+/- 4.1 p=0.317	SUI 27.3 +/- 1.6 vs. Control 26.7 +/- 2.1 p=0.212	Median IQR SUI 2 (1.5-2), control 2 (2-2), p=0.827	All postmenopausal	NI	Estrogen and progesterone receptors, collagen, elastin, proteoglycans (fibromodulin, decorin), and the VIP
Augoulea et al. 2015	SUI	PE	immunoturbimetric assay, autoanalyzer,immunoenzymatic assay, ELISA, electrochemiluminescence immunoassay	138	137	SUI by 1hr pad test	NI	Medical history of urge or mixed type of incontinence, hysterectomy, neurological disorders, cancer or the intake of menopausal hormone therapy.	Matched continent control	Serum	SUI 56.92 vs. Control 55.99 +/- 6.14 p=0.203	SUI 27.38, control 27.00 +/- 4.02 p=0.454	NI	All postmenopausal, NS difference in duration	Significantly higher bloodpressure in SUI compared to controls	Estradiol (E2), FSH, LH, Testosterone, D4-Androstendione (D4A), DHEAS, prolactin, SBHG, glucose, insulin, triglycerides, cholesterol, HDL, LDL, ApoA1, ApoB.
Bodner-Adler et al. 2017	SUI	PE	electrochemiluminescence immunoassay	47	47	SUI based on urogynaecological interview, complete vaginal and pelvic examination with controlled provocation, according to the ICS guidelines. SUI by cough test and pad test with a standardized bladder filling. Cough test was graded according to the urinary loss visualized, Pad test was evaluated as positive if the difference in weight was >0.5 g. Urodynamic assessments were not performed.	No systemic or local hormone treatment (including use of oral contraceptives as well as use of vaginal oestrogens) or intake of selective oestrogen receptor modulators, 60% of women with SUI had to take antihypertensive medication.	Premenopausal or unclear menopausal status; pelvic organ prolapse ≥ grade 2; medical history of urgency incontinence (defined as a complaint of involuntary loss of urine associated with urgency); mixed UI (defined as a complaint of involuntary loss of urine associated with urgency and also with effort or physical exertion or on sneezing or coughing) or urgency (defined as complaint of a sudden, c…	Healthy periand postmenopausal volunteers with any benign gynaecological disease and without any evidence of UI or female pelvic floor dysfunction, no history of SUI or urgency incontinence when interviewed and proved continent in a simple cough provocation test with spontaneously filled bladder checked by bladder scanning. The majority were undergoing routine gynaecological examination and one-t…	Serum	SUI 67 (11.4), control 65 (9.3) p=0.955	SUI 29 (5.8), control 27 (4.8) p=0.837	SUI 2.3 (1.7) control 2.4 (1.6) p=0.598	Years from menopause SUI 15 (9.9) control 12.7 (8.2) p=0.971	Hypertension % SUI 28 (60), control 6 (13) p<0.001, smoking NS different, hysterextomy SUI 18% (38), control 2 (4), p<0.001, mode of delivery NS different	FSH, LH, fE2, Testosterone, Prolactin, AEON, SHBG, DHEAS
Fan et al. 2017	SUI	PE	IHC	40	40	SUI undergoing tension-free obturator tape surgery for SUI, diagnosed by gynecological and urine dynamics examinations	No hormone drugs during the 3-month peri-operative period	Estrogen-related diseases such as genital and urinary tract infections, mental disorders, functional ovarian tumors, and patients with major organ diseases such as cardiopathy,liver cirrhosis, and acute inflammation	Patients undergoing vaginal or total abdominal hysterectomy for treatment of non-estrogen-related diseases	Anterior wall of the vagina	SUI 44.7±1.5 control 43.8±1.4 NS	NI	NI	NI	The differences of general parameters between the two groups were not statistically significant (P>0.05).	Tissue inhibitor of metalloproteinase-3 (TIMP-3), pituitary adenylate cyclase-activating polypeptide (PACAP), and vasoactive intestinal peptide (VIP)
Zhang et al. 2017	SUI	PE	IHC, WB	12	12	SUI according to the recommendations of the ICS undergoing TVT, diagnosis by medical history, gynecological examination, urinary stress test, ultrasonography and urodynamic examination, including a POP‑quantification test.	No hormone replacement within 3 months	Hormone replacement therapy within the previous 3 months; signs of urinary infection; estrogenassociated disease (endometriosis, myoma or functional ovarian tumor); clear clinical evidence of POP (grade 2 or higher); and urge incontinence	Without SUI or POP who were undergoing intravaginal cystectomy for vaginal wall cyst	Anterior vaginal wall (included mucosa, submucosa, connective tissue and smooth muscle) and cultured fibroblasts (from this tissue from 3 SUI pts only)	SUI 47.5±9.2 control 47.6±9.9 NS	NS differences, numbers not provided	NS differences (numbers not provided)	Half premenopausal/postmenopausal	NI	Aquaporins (AQP2)
Adamiak et al. 2018	SUI	GE and PE	radioimmunology (labelled commercial kits), IHC, RT-PCR	49	32	Patients operated on for stress urinary incontinence, by medical history, urodynamic assessment with cystometry and urethral profilometry, ultrasound scans and stress tests with (POPQ)	No hormonal replacement therapy (HRT) within 6 months prior to the examination	Hormonal replacement therapy (HRT) within 6 months prior to the examination, urinary tract infections, estrogen-dependent diseases, i.e. endometriosis, uterine leiomyomas, ovarian tumors and prolapse of the genital organs POPQ ³ 1, and overactive bladder.	No episodes of SUI, and were without signs of genital prolapse. Such patients were operated on for vaginal cysts or pre-cancerous and cancerous lesions of the uterine cervix.	Paraurethral connective tissue and serum	SUI pre 46.23 +/- 5.22 vs control pre 48.63 +/- 2.63 p>0.05, SUI post 59.19 +/- 7.22 vs. Control post 62.27 +/- 7.86 p>0.05	NI	NI	SUI 22 premenopausal/27 postmenopausal, control 17 premenopausal/15 postmenopausal	NI	Serum FSH, LH, E2, tissue Era and Erb
Khadzieva et al. 2018	SUI and SUI+POP	GV	real-time PCR	SUI 5, SUI +POP 59	323	SUI	NI	Marphan syndrome, Ehlers–Danlos syndrome, osteogenesis imperfecta, and cutis laxa, as well as acquired disturbances of the connective tissue (rheumatoid arthritis, lupus, scleroderma, polymyositis, dermatomyositis)	NI	Blood	No information on SUI pts (only POP patients vs controls)	NI	No information on SUI (only POP patients vs controls)	NI	No Marphan syndrome, Ehlers–Danlos syndrome, osteogenesis imperfecta, and cutis laxa, as well as acquired disturbances of the connective tissue (rheumatoid arthritis, lupus, scleroderma, polymyositis, dermatomyositis)	FBLN5 sites (rs2430339, rs12586948, rs2284337, rs2498841, rs2018736, rs12589592, rs2430369, rs2245701, rs2474028, rs929608, rs2430347, rs2284338, rs2267989), LOXL1 sites (rs2165241, rs2304719, rs893821, rs2415231) and FBN1 site (rs6493328) and ELN site (rs10949834) genes
Koch et al. 2018	SUI	PE	MS	19	19	SUI: history of symptoms of SUI for at least 3 months (including a specific history of the complaint of involuntary leakage on effort or exertion or on sneezing or coughing), a positive provocation stress test (defined as an observed transurethral loss ofurine simultaneous with a cough or Valsalva maneuver at a bladder volume of 300 ml), negative urine dipstick testing, age≥18 years, patients cap…	NI	Previous treatment for SUI (surgical or pharmacological), a history of overactive bladder symptoms and/or urinary incontinence other than SUI (tested using the ICIQ short form questionnaire) [16]; neurological disorders potentially affecting the urinary tract system, such as multiple sclerosis, Parkinson’s disease; pelvic organ prolapse stage ≥ II (International Continence Society classification)…	Healthy age-matched control, identical criteria but no symptomatic SUI, ICIQ equal to 0 and negative cough test.	Serum	SUI 50+/- 9 vs. Control 50 +/- 10 ns	SUI 28 +/- 6 control 25 +/- 4 p=0.04	Vaginal deliveries SUI 2 +/-1, control 1.8 +/-0.7 NS	SUI 74% 26 pre, control 63 pre/37 post NS	Chronic disease NS different	Serum proteome
Ozcan et al. 2018	SUI	PE	IHC	20	20	SUI by cough stress test	No hormonal drugs during the 3 months before surgery	Previous endometriosis, adenomyosis, uterine fibroids, connective tissue disorders, pelvic inflammatory conditions, or pelvic surgery, POP	Healty women who had surgery for benign reasons such as ureterorenoscopy or urethral caruncle.	Anterior vaginal wall epithelium and stroma	SUI pre 47+/- 5.1 v. control 46.5+/- 4.1, post SUI 50.2 +/- 2.7 vs. Control 49.6 +/- 2.9 p=0.126	SUI pre 30.5 +/- 3.3 vs. Control 27.8 +/- 2.9, SUI post 29.6 +/- 1.3 vs. Control 28.3 +/- 2.5 p=0.126	SUI pre 3.2 +/- 1.1 vs. Control 2.8 +/- 1.4 SUI post 3.2 +/- 1.3 vs. Control 2.9 +/- 1 p=0.781	SUI 10pre/10 post, control 10pre/10post	NI	Nitric oxide, neuronal (nNOS)
Yang et al. 2018	SUI	GE and PE	RT‑qPCR, WB, ELISA, densitometry	18	20	SUI according to ICS	NI	Moderate or severe pelvic organ prolapse	Undergoing wound repair surgery for e.g., paraurethral cyst	Full thickness of vaginal wall, primary fibroblasts and SUI primary fibroblasts	SUI 52.90 +/- 8.09 vs. Control 49.56+/- 6.41	SUI 23.10 +/- 2.23 vs. Control 22.16 +/- 2.40	SUI 1.70 +/- 0.80 vs. Control 1.56 +/0 0.70	NI	NI	Gene expression: miR-93, CAPN2 and MMP1, protein expression: MMP1, calpain-2 and hydroxyproline
Zhou et al. 2018	SUI	GE and PE	WB and RT-PCR	10	10	SUI in accordance with the recommendations of the ICS, who underwent tension-free vaginal tape surgery, by medical history, gynecological examination, urinary stress test, ultrasonography, urodynamic examination, and POP-Q test	No hormone replacement therapy in the last 3 months	Hormone replacement therapy in the last 3 months; urinary infection; estrogen-dependent disease (endometriosis,fibroid or functional ovarian tumor); clinical POP; pre-menopause status; and/or urge incontinence.	Underwent intravaginal cystectomy for vaginal wall cyst without SUI or pelvic organ prolapse (POP)	Anterior vaginal wall including mucosa, submucosa, connective tissue, and smooth muscle	SUI 52.46+/-3.77 vs. Control 53.26+/-4.83 NS	SUI 21.91+/-7.44 vs control 22.37 +/-8.13 ns	SUI 1.78+/-0.56 vs. Control 1.90+/-0.69NS	All postmenopausal, No significant differences in duration	NI	Gene expression: PERK, activating transcription factor 4 (ATF4), and CHOP Protein expression: glucose-regulated protein (GRP78), inositol-requiring enzyme 1(IRE1), protein kinase-like endoplasmic reticulum kinase (PERK), activating transcription factor 6 (ATF6), C/EBP-homologous protein (CHOP), and B-cell lymphoma 2 (Bcl-2).
Li et al. 2019a	SUI	GE and PE	Immunofluorescence staining, WB, RT-q-PCR	18	8	SUI	NI	Connective tissue diseases, pathologically confirmed endometriosis, estrogen‑associated ovarian tumors, pelvic inflammatory conditions, or advanced pelvic organ prolapse [greater than stage ii), no compli cations that may lead to diseases associated with collagen depletion, including diabetes and hyperthyroidism, pelvic surgery or had a history of estrogen application within the past three months	Who underwent hysterectomy surgery (for reasons excluding the presence of malignant tumors and Sui), subjects who underwent benign gynecologic surgeries for fibroids, dysfunctional bleeding and ovarian cysts	Primary cell cultures of periurethral vaginal wall	SUI between 55 to 65, control between 55 to 65	NI	NI	All postmenopausal	See exclusion criteria	Integrin B1, TGF‑β1, and collagen 1 and 3
Penney 2019	SUI	GV	GWAS	1809	4811	SUI self-report: During the past 12months, weekly leakage of urine or lost control of urine and that most leaking episodes were related to physical activity, coughing, sneezing etc.	NI	NI	Never reporting experiencing incontinence, or no more than leeking a few drops less than once a month o all questionnaired to which they responded.	Blood samples and cheeck cell samples	SUI median 57 (IQR 51-65) vs. Control 54 (49-63)	SUI <25 690 (38.1%), 25-30 604 (33.4%), >30 515 (28.5%), vs. Control >25 2843 (59.1%), 25-30 1321 (27.5%), >30 647 (13.4%)	SUI nulliparous 178 (9.85), 1-2 753 (41.6%), 3 or more 878 (48.5%), vs. Control nulli 687 (143%), 1-2 2072 (43.1%), 3 or more 2052 (42.7%) significance not shown	NI	Diabetic SUI 76 (4.2%), vs. Control 131 (2.7%).	GWAS
Reischer et al. 2020	SUI	GV	Sanger sequencing	19	19	History of symptoms of SUI for at least 3 months (including a specific history of complaint of involuntary leakage on effort or exertion or on sneezing or coughing), positive provocation stress test (defined as an observed transurethral loss of urine simultaneous with a cough or Valsalva maneuver at a bladder volume of 300 ml), negative urine dipstick testing, age ≥ 18 years, patients capable of …	No hormonal drugs during the 3 months before surgery	Previous treatment for SUI (surgical or pharmacological), history of overactive bladder symptoms and/or urinary incontinence other than SUI (tested using the ICIQ-short form questionnaire); neurological disorders potentially affecting the urinary tract system, such as multiple sclerosis or Parkinson’s disease; pelvic organ prolapse stage ≥ II, clinically significant bladder outlet obstruction and…	Women without SUI or any other form of incontinence (ICIQ-short form score equal to zero and a negative cough stress test).	Serum	SUI 49.2 +/- 9.6 vs. Contro 49.6 +/- 9.7 NS	SUI 27.6 +/- 6.0 vs. Control 24.8 +/- 3.7 NS	SUI 2.2 +/- 0.9 vs. Control 2.0 +/- 0.8 NS, vaginal deliveries SUI 2.1 +/- 0.9 vs. Control 1.8 +/- 0.7 NS	SUI premenopausal 14/19 (74%), vs control 12/19 (63%) NS	Chronic disease NS different	Known SNPs of candidate genes (COL1A1, MMP1, SERPINA5, UMOD)
Wang et al. 2019	SUI	GE and PE	IHC, Q-RT-PCR, ELISA	5	5	Women diagnosed with SUI according to the guidelines of the ICS who underwent tension-free vaginal tape surgery.	No hormonal replacement therapy within 3 months	Hormone replacement therapy within the previous 3 months; signs of urinary infection; estrogen-related disease (endometriosis, myoma or functional ovarian tumor); and urge incontinence	Without SUI or POP who underwent an intravaginal cystectomy for vaginal wall cysts	Anterior vaginal wall	NI	NI	NI	NI	NI	ERβ (ERβ 1, 2, 3 and 5), matrix metalloproteinase-1 (MMP-1), tissue inhibitor of metalloproteinase-1 (TIMP-1), and collagens I and III.
Zhang et al. 2019	SUI+ POP and SUI	PE	IHC	SUI 6, SUI+POP13	10	SUI undergoing surgery	No hormones three months before surgery	Previous vaginal and urethral surgery history or genital and urinary tract infections. Estrogenrelated diseases, such as endometriosis and functional ovarian tumors	Cervical intraepithelial neoplasia III or carcinoma in situ or postmenopausal ovarian tumor patients.	Pelvic floor ligaments (round, sacral and cardinal) and anterior vaginal wall connective tissue	SUI (N=6) 54.83 +/-14.19, POP+SUI (N=13) 66.85 +/- 12.50 NS p=0.143	SUI 20.63 +/- 2.64, POP+SUI 23.10 +/- 2.38, control 21.78 +/- 1.2 NS p=0.163	SUI 2.67 +/- 0.82, POP+SUI 3.54+/- 2.07, control 2.80+/- 1.14, NS p=0.405	NI	NI	Neuropeptide Y
Wei et al. 2020	SUI	GE	Micro-array, qRT-PCR	11	11	SUI diagnosed via a comprehensive gynecological examination, including the pelvic organ prolapse quantification (POPQ) test, a urodynamic examination, ultrasonography, a urinary stress test, and a gynecological examination. Undergoing surgery	No hormone therapy	History of a prior pelvic surgical operation, connective tissue disorders, gynecologic malignancies, endometriosis, and advanced pelvic organ prolapse (higher than stage II)	No stress urinary incontinence but with benign uterine fibroids, asymptomatic for SUI, but undergoing a transvaginal gynecologic surgical operation	Periurethral vaginal wall	SUI 59.30 +/- 7.40 vs. Control 55.70 /- 6.80 NS p=0.59	SUI 27.00 +/- 3.80 vs. Control 24.30 +/- 3.80 p=0.45	SUI 3.00 +/- 1.10 vs. Control 2.40 +/- 3.80 p=0.37	All postmenopausal	NI	40,173 lncRNAs and 20,730 coding genes
* SUI for collagen assay and SUI+POP for decorin assay
** Total number of study included participants, number of participants could differ per assay
*** Same patient population as Zhu et al. 2008
GE gene expression, GV genetic variant, ICS International Continent Society, IHC immunohistochemistry, MS mass spectometry, NI no information, PCR polymerase chain reaction, PE protein expression, POP pelvic organ prolapse, RFLP restriction fragment length polymorphism, SUI stress urinary incontinence, UUI urgency urinary incontinence, WB Western Blot

## Sheet: Suppl. 2 Animal studies
First author year of publication	SUI/ SUI+POP	Sex	Type of animal, strain etc.	Type of study	GV GE PE	Method of induction	Assay method	No. of animals	No. of controls	Definition trait	Medication use	Exclusion criteria	Definition controls	Tissue and location	Age	Parity	Menopausal status	Comorbidity	Investigated gene/ protein/ SNP/ genetic variant(s)
Bilhar et al. 2018	SUI	F	Wistar rats, weighing 250 g	CC	GE- and PE	VD 3ml+100g weight 3x 4h, sacrificed after 7 days	Real-time RT-qPCR and IHC	17	17	VD 3ml+100g weight 3x 4h sacrificed after 7 days	NI	NI	No VD or any treatments	Urethra	All +/- 120 days old	NI	NI	NI	Collagen 1 and 3, VEGF, NGF, Ki67, MYH11, and MYH2, desmin,
Chen et al. 2012	SUI	F	Virgin C57BL/6 strain mice	CC	PE	VD, 1h (3mm and 8mm)	Histology, immunofluorescence and WB	12	6	SUI by significant lower lpp	NI	NI	Non-instrumented	Urethra	All 6–8 weeks	All virgins	NI	NI	Collagen, elastin and LOX
Chen et al. 2013	SUI	F	Virgin C57BL/6 strain mice	CC	PE	VD, 1h, 8-mm, after 4 days LPP	2D DIGE, LC–MS/MS, WB, immunofluorescence, and IHC	6	6	SUI model: VD 1h, 8mm, after 4 days LPP measurement	NI	NI	Non-instrumented	Urethra	All 6–8 weeks	All virgins	NI	NI	Proteome
Chen et al. 2014a	SUI	F	C57BL/6 Virgin female mice, weight 25–40g	CC	PE	Anesthesia, VD 8mm 1h and/or OVX (after 2 days)	ELISA (serum), immunofluorescence staining and WB	6x3	6	3 models: VD 8mm 1h, OVX, or VD 8mm 1h and OVX after 2 days, examination of tissues at day 19	NI	NI	Noninstrumented (sham operation)	Urethra and serum	All 6-8 weeks	All virgins	Some SUI models underwent OVX	NI	Estradiol, neuronal nitric oxide synthase (nNOS), induced NOS (iNOS), ER-a, ER-b
Chen et al. 2014b	SUI	F	C57BL/6 strain mice, virgin female	CC	PE	Anesthesia, VD 8mm 1h + vehicle examination after 6 days	WB	4 or 5?	4 or 5?	Anesthesia, VD 8mm 1h + vehicle	NI	NI	Noninstrumented control group (sham operation)	Urethra	All 6-8 weeks	All virgins	NI	NI	Myosin, inducible NOS, survival motor neuron protein, a-adrenergic receptor 1a, extracellular superoxide dismutase (SOD3)	data on ADSC's not recorded
Chen et al. 2015	SUI	F	ACTB-Cre/ERα knockout (ERα−/−) mice and WT (Erα +/+) mice	CC	GV and PE	Era -/- mice: via Cre/LoxP system	Genotyping via PCR, IHC and WB	6x2	6	Significantly decreased LPP after knockout of Esr-a receptor	NI	NI	WT Era+/+ mice	Urethra	All 8 weeks	All virgins	NI	NI	Esr-a and changed proteome
Hijaz et al. 2013	SUI	F	C57BL/6 virgin mice	CC	GE and PE	VD 1h 0.3ml or PNT	ELISA and qRT-PCR	9	4 / 9 / 9	SUI model: undergoing VD 1h 0.3ml or PNT	NI	NI	no surgery/no anesthesia, anesthesia only, anesthesia + sham VD	Serum, urethra, vagina and rectal tissues	All 2 months old	All virgins	NI	NI	Chemokine (C-C motif) ligand 7 (CCL7)
Hong et al. 2013	SUI	F	Sprague-Dawley rats, 10w old, mature, weight 250-300g	CC	PE	Anesthesia injection 0.2 mL tiletamine sc., VD 2ml 4h, PNT, or electrocauterization (1204C 30sec per side)	IHC	6 x3	6	Anesthesia injection 0.2 mL tiletamine sc., VD 2ml 4h, PNT, or electrocauterization (1204C 30sec per side), after 2w LPP and tissue examination	NI	NI	Age matched, no anesthesia, no surgery	Urethra	All 10w old	All virgins	NI	NI	Protein gene product 9.5, a-SMA, von Willebrand factor
Huang et al. 2013a	SUI	F	Virgin female Sprague–Dawley rats weighing 300–350 g	CC	GE and PE	VBD 5ml +0.3kg weight, 8h.	Automated biochemical analysis and RT-PCR	40	10	SUI model: anesthesia, VD 5ml hanging from the tabel +0.3kg 8h, sneeze assay at day 7,14,28,56	NI	NI	Age matched, no anesthesia, no surgery	Serum, pubococcygeus muscle tissue	All 6 months	All virgins	NI	NI	Creatine phosphokinase and lactate dehydrogenase (serum), caspase-3 gene
Jiang et al. 2018	SUI	F	Sprague-Dawley rats (250-300g), adult	CC	GE	Sensory and motor PNC, bilateral, 2 x30sec, followed by VBD 4h 3ml, LPP and cystometry after 2w	RT-PCR	8	8	SUI model: sensory and motor PNC, bilateral, twice x30sec, followed by VBD 4h 3ml	NI	NI	Sham injury (no filling of balloon, no PNC)	Lumbosacral spinal cord (oNeufs nucleus)	NI, mature	NI	NI	NI	BDNF, B2-tubulin
Latsyna et al. 2018	SUI	F	300-g sexually mature white laboratory female rats	CC	PE	PNT	IHC	20	20	SUI model: PNT	NI	NI	Daily administration of intraperitoneal 0.3ml saline	Bladder	NI, mature	NI	NI	NI	eNOS, iNOS and nNOS
Lenis et al. 2013	SUI	F	Lewis rats	CC	GE	Delivery and/or VD 3ml 4h	RT-PCR	18 x3	18	3 models: virgin rats with anesthesia and VD 3ml 4h, delivery without VD with anesthesia, delivery with anesthesia,VD 3ml 4h within 24h after delivery	NI	NI	Virgin controls without VD with anesthesia	Urethra	All 9 week old	All either virgin or primiparous	NI	NI	CXCL12, CXCR4, CD191, CD192, VEGF, CD193, CD195, CCL7, HIF-1a and IL-8
Li et al. 2012a	SUI	F	Sprague-Dawley rats, pregnant, primiparous	CC	PE	Delivery,VBD 5ml, 4h+160mg, after 1w OVX, after 10days peri-urethral injection of PBS, 4 weeks after that LPP measurement	Histology and WB	20 (differs per assay)	20 (differs per assay)	SUI model: spontaneous delivery, VBD 5ml, 4h+160mg, after 1w OVX, after 10 days peri-urethral injection of PBS	NI	NI	Delivery, sham surgery (No OVX, no periurethral injection)	Urethra	All 8-week old	All primiparous	SUI models undergone OVX	NI	VEGF, PhosphoERK1/2 (P-ERK1/2), ERK1/2 (Cell Signaling), collagen I/III, a-SMA	organ bath experiment and cell culture were not SUI-model related therefore left out.
Li et al. 2012b	SUI	F	Sprague-Dawley rats, pregnant, primiparous	CC	PE	Delivery, VBD 4h(ml unknown), after 1w OVX	Histology and WB	14 (differs per assay)	14 (differs per assay)	SUI model: Delivery, VBD 4h, after 1w OVX	NI	NI	Delivery, sham surgery (no OVX)	Urethrovaginal tissue	All 8-week old	All primiparous	SUI models undergone OVX	NI	TGF-B1, Smad2, MMP-9, collagen, a-SMA
Li et al. 2018	SUI	F	C57BL/6 mice, virgin	CC	PE	VD 1h 8mm (0.3 ml saline), after 1 week examination	WB, TUNEL assay	15	15	SUI model: VD 1h 8mm (0.3 ml saline)	NI	NI	Mice without intervention	Urethra and anterior vaginal wall	All 8 weeks	All virgins	NI	NI	Nrf2, MDA
Li et al. 2019b	SUI	F	C57BL/6 mice, virgin, and Cav 3.2−/− mice	CC	GV and PE	VD 1h 8mm, examination after 7 days (LPP)	IHC, immunofluorescence (WB, qRT-PCR for cells and treated tissues/animals)	15	15	SUI model:VD 1h 8mm, examination after 7 days (LPP)	NI	NI	WT noninstrumented controls and Cav 3.2-/- noninstrumented controls	Anterior vaginal tissues	All 8-10 week old	All virgins	NI	NI	Cav 3.2, calpain 2, collagen 1 and 3. (talin 1, integrin β1/transforming growth factor (TGF)-β1 only in cells not in SUI animal models)
Lin et al. 2009	SUI	F	Sprague-Dawley rats, pregnant	CC	GE and PE	Delivery, VBD 3ml,3h, 1w later OVX, investigations 12w after delivery	Microarray analysis, real-time PCR, WB, and IHC	10 (differs per assay)	14 (differs per assay)	Intermittent leakage without bladder contraction during bladder filling	NI	NI	Continent after method of induction	Whole urethra	All 2 months old	All primiparous	Both OVX	NI	Whole transcriptome and Smad2, Mmp-13, Plk1, Rgs2	Conclusions: Inhibiting endogenous IGF-1 activity using JB-1 delayed recovery from impaired urethral continence function in a rat model of SUI induced by simulated childbirth trauma in association with increased apoptotic changes and inhibition of neuronal regeneration in urethral tissues.
Lo et al. 2020	SUI	F	Sprague Dawley rats	CC	PE	Opening paravesical space	histology, IHC and WB	7	7	Opening paravesical space (Study F), LPP significantly lower than control	NI	NI	Normal (non operated rats) or sham-operaties rats (N=7 and N=7)	Urethra	12.8 +/-1.2 weeks old	NI	NI	NI	IL-1, TNF-α, NGF, MMPs and CD-31	mentioning of mice died because of biting accident
Min et al. 2017	SUI	F	C57BL/6 mice	CC	GE and PE	VD 1h 8mm	WB, RT-PCR	15	15	SUI model: VD 1h 8mm, no treatment	NI	NI	Control group, no intervention	Anterior vaginal wall	All 8 weeks	NI	NI	NI	Collagen 1, collagen 3, TGF-B1, Smad 2, Smad 3, t-type calcium channel (Cav3.2, Cav3.1.).	results of treated cells not collected because no clear statement of SUI model provided.
Resplande et al. 2002	SUI	F	Sprague-Dawley rats, pregnant	CC	PE	Delivery, VBD (5ml+130gram, 4h), OVX, 9months of waiting time	IHC and EM	14	10	After delivery, VBD and OVX	NI	NI	9 months after delivery	Bladder, ureters, urethra, distal vagina, clitoris and a portion of the pubic bone	Age matched	Matched	OVX in SUI group	NI	Apoptotic index	No inclusion of data of animals who received treatment
Sievert et al. 2001	SUI	F	Sprague-Dawley rats	CC	PE	Delivery, VBD (5ml, 3h), OVX	IHC and EM	12	12 (only delivery), 10 (virgin)	SUI by LPP, UDO, sneezetest	NI	NA	Virgin rats	Bladder, bladder neck and urethra	NI	NI	Part of SUI group underwent OVX	NI	Caveolin-1, caveolin-3, neuronal NOS, collagen	No inclusion of data of animals who received treatment
Song et al. 2016	SUI	F	Sprague-Dawley rats (200–250 g)female, virgin	CC	PE	PNC (2x bilateral 30 sec),VD 3ml 4h + saline injection, examination after 2 weeks	Histology and IHC	7	7	SUI model wihtout treatment: PNC (2x bilateral 30 sec) and VD 3ml 4h + saline injection, examination after 2 weeks. Lower LPP compared to control	NI	NI	Sham PNC+VD, and saline injection	Urethra	Age matched	All virgins	NI	NI	Collagen and PGP 9.5
Sumino et al. 2016	SUI	F	Sprague Dawley rats, weight 230-306 g	CC	PE	Vehicle injection, VD 4ml, 4h, 7 days after VD examination	ELISA, WB, IHC, Tunel staining	20	4	SUI model: vehicle injection,VD 4ml, 4h, 7 days after VD examination.	NI	NI	Sham operated, balloon inserted without inflation 4h	Urethra and serum	All 8 weeks	NI	NI	NI	IGF-1, Akt, tyrosine hydroxylase, Vacht vesicular acetylcholine transporter	No inclusion of data of animals who received treatment
Tang et al. 2017a	SUI	F	WT (Nfe2l2+/+) virgin female C57BL/6 mice and Nfe2l2−/− mice	CC	GV, GE and PE	WT vs. Nfe2l2-/- mice, noninstrumented vs. Sham operated, vs. VD 1h group	WB, MDA assay, q-PCR	30 (3x10)	30 (3x10)	WT vs. Nfe2l2-/- mice, noninstrumented vs. Sham operated, vs. VD 1h group	NI	NI	WT vs. Nfe2l2-/- mice, noninstrumented vs. Sham operated, vs. VD 1h group	Anterior vaginal wall	All 8-10 weeks old	All virgins	NI	NI	Collagen I (A1), Collagen III (A1), Elastin, Nrf2, GPx1, MnSOD ,TGF-β1, Smad2, Smad3, TIMP-1, TIMP-2	results of OAB group not noted
Tang et al. 2017b	SUI	F	C57BL/6 mice, WT	CC	GE- and PE	VD 1h 8mm (0.3 saline)	Masson staining, IHC study, WB analysis, and quantitative PCR	15	15	SUI model: VD 1h 8mm (0.3 saline). Significantly lower LPP compared to control.	NI	NI	Non-instrumented	Urethra and anterior vaginal wall	All 8-10 weeks old	All virgins	NI	NI	β-actin, collagen I, collagen III, α-SMA, Nrf2, TGF-β1, GPx1, Smad2, Smad3, p-Smad2, and pSmad3 and MnSOD	results of treatment groups were not noted
Tang et al. 2019	SUI	F	WT, Nfe2l2+/+ virgin C57BL/6J mice and Nrf2-KO, Nfe2l2-/-	CC	GV and PE	VD 6Fr foley, 0,3ml 1h, LPP measurement after 7 days, or after 14 days. And KO of Nfe2l2 -/-	TUNEL assay, WB, protein specific measurement kits, IHC	15 (x4)	15 (x4)	SUI model: VD 6Fr foley, 0,3ml 1h, LPP measurement after 7 days, or after 14 days. And KO of Nfe2l2 -/-	NI	NI	WT noninstrumented and Nfe2l2-/- noninstrumented, sham operated WT and sham operated Nfe2l2 -/- (Sham; catheter insertion and suture, no inflation)	Anterior vaginal tissue	All 8 to 10 weeks	All virgins	NI	NI	Nrf2, MDA, CAT, GSH-PX, T-SOD, 8-OHdG and 4-HNE, Bcl2, Bax, cleaved caspase-3, or cleaved caspase-9	results of cells not included due to no clear SUI model
Wan et al. 2017	SUI	F	Sprague-Dawley rats, weighing 280 to 330 g, at gestational day 16	CC	PE	Delivery, VD 4ml 4h, after 1 w OVX + ip injections with ethanol and PBS, experiments after 30days.	IHC, masson stain, TUNEL assay, WB	6	6	SUI model:Delivery, VD 4ml 4h. + after 1 week bilateral OVX + intraperitoneal injections with ethanol and PBS, experiments after 30days.	NI	NI	Non-instrumented, intraperitoneal injections with ethanol and PBS	Bladder-urethra complex and serum	All 2 month old	All primiparous	SUI group underwent OVX	NI	Collagen, MDA, total SOD, GSH-Px, and CAT. Bax/bcl-2 ratio, HO-1, NQO1, Nrf2	result of treated rats not noted
Wang et al. 2015	SUI	F	Sprague-Dawley rats	CC	PE	Delivery and VBD 3ml +130g weight, 6h, evaluation after 1 week	IHC, histology and WB	20induction-->10SUI (differs per assay)	20 (10 blank 10 controls) (differs per assay)	SUI model: positive sneezetest and padtest 1 week after induction, VD 3ml, 6h +130g.	NI	NI	Blank: non-pregnant, no treatment, control: normal parturition, no treatment	Anterior vaginal wall	All 8 weeks	NI	NI	NI	Collagen fibers,TbR-2, Smad3 and Smad7	results of treated cells not collected because no clear statement of SUI model provided.
Wu et al. 2018	SUI	F	Sprague-Dawley rats	CC	GE and PE	VBD 16-fr, 4ml 4h, OVX after 1 week, investigation 5 weeks after VBD	IHC, RT-PCR	9	10	SUI model: VBD 16-fr, 4ml 4h, OVX after 1 week, investigation 5 weeks after VBD	NI	NI	Normal controls	Urethra	All 12 weeks	NI	SUI rats received bilateral OVX	NI	VEGF	results on treated mice (lentivirus) were not noted
Yang et al. 2019	SUI	F	Sprague-Dawley rats, primiparous	CC	PE	Delivery, VD 5ml, 18Fr +160g 4h, after 13d OVX, examination of LPP and bladder capacity after 5w	histology (masson trichrome staining and immunofluorescence) and WB	10 (differs per assay)	10 (differs per assay)	SUI model: Delivery, VD 5ml, 18Fr +160g 4h. + after 13d OVX	NI	NI	Mock operation(midline abdominal incision without modeling)	Urethra	All 8 weeks old	All primiparous	SUI group underwent OVX	NI	a-SMA, MHC, Pax7, MyoD, P38	results on treated rats were not noted
Yoshikawa et al. 2017	SUI	F	Sprague-Dawley rats, weighing 252–330 g, adult	CC	GE	VD 4ml 4h (1x or 3x 2weekly, examination after 6 weeks from first VD	RT-PCR	36 (6 per assay)	18 (6 per assay)	2 SUI models, single VD and 3 times VD.	NI	NI	Non-instrumented	Urethra	NI, adult	NI	NI	NI	TNF-a, Tnfr1, Tnfr2, Il-6, Il-1b and Tgfb1, Mmp2, Mmp9, collagen 1a, collagen 3a,Timp-1, Timp-2, A1A-adrenoceptors and nicotinic receptor subunits	results of diabetic rats and results after electronic stimulation were not noted
Zeng et al. 2019	SUI	F	Wistar rats	CC	PE	Delivery and VBD, 3ml +130g weight, 6h, evaluation after 1w	ELISA and WB	10	5	Delivery and VBD, 3ml +130g weight, 6h, evaluation after 1w, positive sneezing experiment	NI	NI	Non-pregnant and without any treatment	Pubococcygeal muscles, peripheral blood (supernatant)	All 8 weeks old	NI	NI	All healthy	Neuropeptide Y (NPY)
Zhang et al. 2020a	SUI	F	Sprague Dawley rats	CC	PE	Urethrolysis, OVX, PBS injection weekly 5w	immunofluorescence, WB	5	5	Abdominal incision, urethra detached circumferentially from anterior vaginal wall and pubic bone, OVX, PBS injection weekly for 5w, LPP lower than controls	NI	NI	Not operated rats	Urethra and bladder	8w	NI	Operated group received OVX	NI	a-SMA, elastin, collagen I, collagen III, TGF-β1, Smad2/3, and p-Smad2/3, SIRT7
Zhang et al. 2020b	SUI	F	Sprague Dawley rats	CC	PE	VBD 4cc, + 130 weight, 4h + BAPN to inhibit lysyl oxidase, OVX after 3 days, after 2wks from VBD BAPN injections 2/w for 5w	immunofluorescence, WB	8	8	VBD + BAPN (SUI group) and OVX, lower LPP than control	All were injected with 5-ethynyl-2-deoxyuridine (50 mg/kg, intraperitoneally) at birth	NI	Not operated, receiving 5-ethynyl-2-deoxyuridine (50 mg/kg, intraperitoneally) at birth	Urethra and vagina	8w	NI	Operated group received OVX	NI	a-SMA, Myosin heavy chain, neuromuscular junctions, neuronal NOS, tyrosine hydroxilase
Zordani et al. 2019	SUI	F	Rats weighing 250/300 g	CC	PE	Bilateral PNT, laparotomy was closed in layers, after 4w LPP	IHC	8	8	SUI group: bilateral PNT	NI	NI	sham‐operated rats	Bladder and urethra	All 12 weeks	NI	NI	NI	von Willebrand factor (representing vasa in tissue)
2D DIGE Dimensional differential gel electrophoresis, BAPN b-aminopropionitrile, CC Case control, ELISA Enzyme-linked immunosorbent assay, EM electronmicroscopy, F Female, IHC Immunohistochemistry, KO knockout, LC–MS/MS liquid chromatography–tandem mass spectrometry, LPP Leak point pressure, NI no information, NOS nitric oxide synthase, OVX ovariectomy, PCR polymerase chain reaction, PNC pudendal…

## Sheet: Suppl. 3 Candidate outcomes
Candidate gene, protein(-related product), variant	GV/GE/PE*	Examined species	No SUI subjects	No controls	Tissue and location	Findings	Assay method	Author, year
4-hydroxynonenal (4-HNE)	GV and PE	WT C57BL/6J and Nfe2l2-/- female mice, 8-10 weeks, virgins	15 (x4)	15 (x4)	Anterior vaginal wall	Levels of 4-HNE in the WT-VD7d group were significantly higher than those in the WT-NC, WT-Sham, KO-NC, and KO-Sham groups, but they were significantly lower than those in the KO-VD7d group	Immunohistochemistry	Tang et al. 2019
8-oxo-2′-deoxyguanosine (8-OHdG)	PE	WT C57BL/6J and Nfe2l2-/- female mice, 8-10 weeks, virgins	15 (x4)	15 (x4)	Anterior vaginal wall	Levels of 8-OHdg in the WT-VD7d group were significantly higher than those in the WT-NC, WT-Sham, KO-NC, and KO-Sham groups, but they were significantly lower than those in the KO-VD7d group	Immunohistochemistry	Tang et al. 2019
A1A adrenoceptors/ Adrenergic receptor 1a (AdR1a)	GE	Sprague-Dawley rats, female, weighing 252–330g, adult	36	18	Urethra	No significant changes in mRNA levels of A1A-adrenoceptors were observed in VD groups compared with controls	RT-PCR	Yoshikawa et al. 2017
	PE	C57BL/6 strain female mice, 6-8 weeks, virgin	4	4	Urethra	No significant changes in protein expression levels in VD group compared to controls	Western blot	Chen et al. 2014b
a2-macroglobulin (a2-M)	GE and PE	Human	28 (14 prol. phase; 14 secr. phase)	29 (14 prol. phase; 15 secr. phase)	Full-thickness, peri-urethral vaginal mucosa	Proliferative phase: mRNA in control group 11 times higher than in SUI group(P=0.03), Protein expression (mean +/- SE mug/mg/ml): Control 7.58 +/- 1.65, SUI 3.45 +/- 0.63, p=0.048. Sectretory phase: mRNA in control group 8 times higher than in SUI group(P=0.01), Protein expression: Control 17.73 +/- 4.5, SUI 6.20 +/- 2.19, p=0.044.	ELISA and RT-PCR	Wen et al. 2008b
Androstendion /AEON	PE	Human	47	47	Serum	AEON mean +/-SD SUI 0.598 +/-0.42, control 1.20+/-0.87 ng/ml, p-value 0.033*	Electrochemiluminescence immunoassay	Bodner-Adler et al. 2017
Akt	PE	Sprague Dawley female rats, 8 weeks, weight 230-306 g	20 (not clear)	4	Urethra	7 days after VD SUI group had significantly (p<0.01) lower p-Akt/total Akt compared to control group, after 14 days NS difference.	Western blot	Sumino et al. 2016
Alpha-1 antitrypsin (a serine protease inhibitor)	GE and PE	Human	12 (differs per assay)	15 (differs per assay)	Peri-urethral vaginal wall	Alpha-1 antitrypsin mRNA SUI (N=11) mean 26.6 +/- SE 7.5 vs. control (N=9) 117.2 +/- 37.4 p=0.018, Protein expression in SUI/POP patients (mean+/-SE 0.42 +/- 0.078), control group (mean +/-SE 1.58 +/- 0.27) (P < 0.003)	RT-PCR, western blot, QC-PCR	Chen et al. 2004b
	GE and PE	Human	22 (8 secr.; 14 prol. phases)	(9 secr.; 18 prol. phases)	Periurethral vaginal wall	mRNA in proliferative phase was lower in SUI when compared to controls (p=0.03), in secretory phase no significant difference. Protein expression of native ATT (active form) was significantly decreased in secretory SUI tissues compared to controls (P = 0.019).	Spectrophotometry, RT-PCR, Western blot	Chen et al. 2007
Androgen receptor	GE	Human	12 (4 pre-menopausal; 8 post-m)	11 (6 pre-m; 5 post-m)	Para-urethral	No significant difference in gene and protein expression between SUI and control	immunohistochemistry, RT-PCR	Soderberg et al.2007
	GV	Human	91	66	Blood	No statistical significant associations	PCR	Cornu et al. 2011
ApoA1	PE	Human	138	137	Serum	APoA1 SUI 162.09 control 167.30mg/dl p-value 0.090	Immunoturbimetric assay	Augoulea et al. 2015
ApoB	PE	Human	138	137	Serum	ApoB SUI 98.17 control 96.11 (+/-21.48) p-value 0.419	Immunoturbimetric assay	Augoulea et al. 2015
Apoptotic index	PE	Sprague-Dawley rats, matched in age and parity (numbers not provided), SUI group underwent OVX, pregnant	14	10	Bladder, ureters, urethra, distal vagina, clitoris and a portion of the pubic bone	Apoptotic index SUI group 3.23+/- 2.30 vs. control 1.40 +/- 1.06 (p= 0.017)	Immunohistochemistry	Resplande et al. 2002
Aquaporins (AQP2)	PE	Human	12	12	Anterior vaginal wall tissue	Control AQP2/β-actin ratio, 8.13±0.85, SUI AQP2/β-actin ratio, 2.02±0.52, P<0.01	Immunohistochemistry, western blotting	Zhang et al. 2017
Activating transcription factor 4 (ATF4)	GE	Human	10	10	Anterior vaginal wall	ATF4 mRNA levels were enhanced in postmenopausal women with SUI, compared with control subjects (P<0.05)	RT-PCR	Zhou et al. 2018
Activating transcription factor 6 (ATF6)	PE	Human	10	10	Anterior vaginal wall	No differences in protein expression between SUI and controls	Western blot	Zhou et al. 2018
a-SMA	PE	Sprague-Dawley rats, pregnant, 8weeks old, primiparous, SUI group underwent OVX	20 (differs per analysis)	20 (differs per analysis)	Urethra	SUI significantly lower a-SMA-b/actin ratio compared to controls	Western blot	Li et al. 2012a
	PE	Sprague-Dawley rats, pregnant, 8weeks old, primiparous, SUI group underwent OVX	14	14	Urethrovaginal tissue	SUI group had significantly lower muscle content (a-SMA) than sham group	Western blot	Li et al. 2012b
	PE	Sprague-Dawley rats, 10w old, mature, weight 250-300g, virgins	18	6	urethra	Protein expression was lower in SUI group compared to controls	Immunohistochemistry	Hong et al. 2013
	GE and PE	C57BL/6 mice, WT, 8-10 weeks, virgin	15	15	Urethras and anterior vaginal walls	Lower GE and PE in SUI group compared to controls	Western blot and quantitative PCR	Tang et al. 2017b
	PE	Sprague Dawley rats, 8weeks, SUI group underwent OVX	5	5	Urethra and bladder	Lower protein expression in SUI group compared to controls	Immunofluorescence, western blot	Zhang et al. 2020a
	PE	Sprague Dawley rats, 8weeks, SUI group underwent OVX	8	8	Urethra and vagina	Significantly lower a-SMA in SUI compared to control	Immunofluorescence, western blot	Zhang et al. 2020b
	PE	Sprague-Dawley rats, 8weeks, primiparous, SUI group underwent OVX	10	10	Urethra	Significant lower a-SMA density in SUI group compared to controls p<0.05.	Immunofluorescence	Yang et al. 2019
B2-tubulin	GE	Sprague-Dawley rats (250-300g), adult	8	8	lumbosacral spinal cord (oNeufs nucleus)	No significant difference in relative mRNA expression between SUI an control group.	RT-PCR	Jiang et al. 2018
B-actin	GE and PE	C57BL/6 mice, WT, 8-10 weeks, virgin	15	15	Urethras and anterior vaginal walls	No significant difference between SUI and control (used as reference gene)	Western blot and quantitative PCR	Tang et al. 2017b
BAX	GV and PE	WT C57BL/6J and Nfe2l2-/- female mice, 8-10 weeks, virgins	15 (x4)	15 (x4)	Anterior vaginal wall	Increase of BAX protein expression after VD when compared to WT controls, increase was even more in Nfe2l2-/- VD mice when compared to WT VD mice.	Western blot	Tang et al. 2019
Bax/Bcl2 ratio	PE	Sprague-Dawley rats, 2 months old, 280-330 g, primiparous, at gestational day 16, SUI group underwent OVX	6	6	Bladder-urethra complex	Relative Bax/Bcl-2 expression significantly elevated in SUI compared to control p<0.05	Western blot	Wan et al. 2017
B-cell lymphoma 2 (Bcl-2)	PE	Human	10	10	Anterior vaginal wall	Lower Bcl-2 protein expression in women with SUI, compared with control subjects (P<0.05)	Western blot	Zhou et al. 2018
	GV and PE	WT C57BL/6J and Nfe2l2-/- female mice, 8-10 weeks, virgins	15 (x4)	15 (x4)	Anterior vaginal wall	Decrease of Bcl2 protein expression after VD when compared to WT controls, decrease was even more in Nfe2l2-/- VD mice when compared to WT VD mice.	Western blot	Tang et al. 2019
BDNF	GE	Sprague-Dawley rats (250-300g), adult	8	8	lumbosacral spinal cord (oNeufs nucleus)	No significant difference in relative mRNA expression between SUI an control group.	RT-PCR	Jiang et al. 2018
BICD2	GE and PE	Human	10	10	Periurethral vaginal wall	Significantly higher gene (p<0.05) and protein (p<0.01) expression in SUI, compared with control subjects	RT-PCR, western blot, densitometry	Liu et al. 2014
Biglycan	GE	Human	6	6	Periurethral vaginal biopsy	No significant difference in mRNA expression between SUI and control group.	Northern blot	Falconer et al. 1998a
	GE	Human	6	6	Periurethral vaginal biopsy	No significant difference in mRNA expression between SUI and control group.	Northern blot	Falconer et al. 1998b
	GE and PE	Human	31 (15 prol. phase/16 secr. phase) differs per assays	31 (17 prol. phase/14 secr. phase) differs per assays	Peri-urethral vaginal mucosa	RT-PCR: SUI proliferative phase 4.12+/-2.7 N=8), vs. Control (N=9) 4.56+/-1.6) p=0.85, secretory phase SUI 2.56+/-1.12(N=8) vs. Control 5.77+/-1.5(N=8) p=0.12 (all MEAN +/-SEM). Protein expression higher density in SUI samples than in control samples in the secretory phase, but no visual difference in the proliferative phase.	RT-PCR, immunohistochemistry , immunofluorescence and western blotting	Wen et al. 2007
Calpain-1	GE and PE	Human	39	31	Periurethral vaginal tissues	The relative expression of calpain-1 mRNA and protein in SUI were 0.79±0.14 and 0.72±0.07, similar to the control group (0.62±0.07 and 0.69±0.09, respectively), NS	Semiquantitative competitive RT-PCR and Western blotting.	Wu et al. 2010
Calpain-2/CAPN2	GE and PE	Human	39	31	Periurethral vaginal tissues	Calpain-2 mRNA and protein expressions SUI: 1.36±0.06 and 0.75±0.07, respectively, significantly higher than in controls (1.16±0.04 and 0.56±0.06, respectively, P<0.05)	Semiquantitative competitive RT-PCR and Western blotting.	Wu et al. 2010
	PE	Human	18	20	Full thickness of vaginal wall tissue	The protein levels of calpain-2 (P<0.05) were increased in the SUI group compared to controls	Western blot	Yang et al. 2018
	GV and PE	C57BL/6 mice, virgin, and Cav 3.2−/− mice, 8-10weeks	15	15	Anterior vaginal wall	Lower protein expression in SUI group (WT-vaginal distended) compared to controls (WT-normal controls(P<0.001)	Immunofluorescence	Li et al. 2019b
Calpastatin	GE and PE	Human	39	31	Periurethral vaginal tissues	Protein expresssion SUI significantly lower than controls (0.72±0.06 versus 1.84±0.09, P<0.01). mRNA expression: SUI significantly higher than controls (0.85±0.07 versus 0.62±0.06, P<0.05)	Semiquantitative competitive RT-PCR and Western blotting.	Wu et al. 2010
Caspase-3	GE	Sprague–Dawley rats, female, 6months old, weighing 300–350 g, virgin	40	10	Pubococcygeus muscle tissue	Caspase-3 relative gene expression day 7 SUI 1.40814 +/- 0.11606 vs. control 0.43411 +/- 0.04197 p= 7.76 x 10E-5	RT-PCR	Huang et al. 2013a
	GV and PE	WT C57BL/6J and Nfe2l2-/- female mice, 8-10 weeks, virgins	15 (x4)	15 (x4)	Anterior vaginal wall	Increase of cleaved Caspase-3 protein expression after VD when compared to WT controls, increase was even more in Nfe2l2-/- VD mice when compared to WT VD mice.	Western blot	Tang et al. 2019
Caspase-9	GV and PE	WT C57BL/6J and Nfe2l2-/- female mice, 8-10 weeks, virgins	15 (x4)	15 (x4)	Anterior vaginal wall	Increase of cleaved Caspase-9 protein expression after VD when compared to WT controls, increase was even more in Nfe2l2-/- VD mice when compared to WT VD mice.	Western blot	Tang et al. 2019
CAT/catalase	PE	Sprague-Dawley rats, 2 months old, 280-330 g, primiparous, at gestational day 16, SUI group underwent OVX	6	6	Bladder-urethra complex	No significant difference between SUI and control	Catalase assay kit	Wan et al. 2017
	GV and PE	WT C57BL/6J and Nfe2l2-/- female mice, 8-10 weeks, virgins	15 (x4)	15 (x4)	Anterior vaginal wall	The activities of CAT in the WT-VD7d group were significantly lower than those in the WT-NC, WT-Sham, KO-NC, and KO-Sham groups, but they were significantly higher than those in the KO-VD7d group. The activities of CAT in the WT-VD14d group were significantly higher than those in the KO-VD14d group.	CAT measurement kit	Tang et al. 2019
Cathepsin K	GE and PE	Human	12 (differs per assay)	15 (differs per assay)	Peri-urethral vaginal wall	Cathepsin K mRNA SUI/pop (mean 2.79 +/- SE 1.6, vs control 2.65 /- 1.1 p=0.7, also NS for protein levels (no quantitative data)	RT-PCR, western blot, QC-PCR	Chen et al. 2004b
Caveolin-1	PE	Sprague-Dawley rats, virgin	12	10	Bladder: inner urethra, inner bladder neck, outer bladder neck, outer bladder, inner bladder	Caveolin-1 inner urethra SUI 7.5+/-1.6, control 17.1 +/- 0.7 p<0.05), inner bladder neck 12.8 +/- 1.9 vs. 11.6 +/- 3.0 (NS), Outer bladder neck 12.5 +/-2.2 vs. 13.7 +/- 3.7, (NS), Outer bladder 14.0 +/- 2.9 vs. 21.7 +/- 0.9 (p<0.05)	Immunohistochemistry	Sievert et al. 2001
Caveolin-3	PE	Sprague-Dawley rats, virgin	12	10	Outer urethra	Caveolin-3 outer urethra SUI 11.4 +/- 2.9 vs. 20.6 +/- 2.6 (p<0.05)	Immunohistochemistry	Sievert et al. 2001
Cav3.1	GE and PE	C57BL/6 mice, 8 weeks	15	15	Anterior vaginal wall	After VD, a significant decrease was observed in Cav3.1 at both the protein and mRNA levels	Western blot, RT-PCR	Min et al. 2017
Cav3.2	GE and PE	C57BL/6 mice, 8 weeks	15	15	Anterior vaginal wall	After VD, a significant decrease was observed in Cav3.2 at both the protein and mRNA levels	Western blot, RT-PCR	Min et al. 2017
	GV	C57BL/6 mice, virgin, and Cav 3.2−/− mice, 8-10weeks	15	15	Bladder	LPP of Cav3.2 KO model after VD was lower compared to WT model after VD.	Clinical evaluation and LPP measurement	Li et al. 2019b
CCL7	GE and PE	C57BL/6 mice, 2months old, virgin	9	4 / 9 / 9	Serum and Pelvic tissue (urethra, vagina and rectal tissues)	Urethra higher expression in SUI compared to controls immediately (adjusted P = 0.08) and 24 hours (adjusted P < 0.01) after VD. Relative CCL7 expression 3 times higher than controls immediately after VD, after 24h 13.6-times as high. Urethral expression CCL7 similar as controls immediately and 24h after in the PNT, sham VD, sham PNT and anesthesia alone groups. Vaginal expression of CCL7 similar…	ELISA and qRT-PCR	Hijaz et al. 2013
	GE	Lewis rats, 9 weeks, virgins, primiparous	18	18	Urethra	CCL7 showed immediate up-regulation after VD and/or parturition. CCL7 was significantly up-regulated 8.9 and 7.6-fold immediately after VD in virgin and postpartum rats, respectively, vs controls (each p <0.001). By 3 days expression was significantly lower and no different than in uninjured virgin controls.	RT-PCR	Lenis et al. 2013
CD-31	PE	Sprague Dawley rats, aged 12.8+/-1.2 weeks old	7	7	Urethra	CD 31 SUI 10.9 +/- 2.0, control 8.7 +/- 1.4 (p =not shown) (mean +/- SD)	Immunohistochemistry and western blot	Lo et al. 2020
CD191	GE	Lewis rats, 9 weeks, virgins, primiparous	18	18	Urethra	Expression of the receptor CD191 was increased in postpartum rats without VD compared to virgin rats without VD (p=0.03) but it normalized by 7 days.	RT-PCR	Lenis et al. 2013
CD192	GE	Lewis rats, 9 weeks, virgins, primiparous	18	18	Urethra	No significant differences between VD rats and controls	RT-PCR	Lenis et al. 2013
CD193	GE	Lewis rats, 9 weeks, virgins, primiparous	18	18	Urethra	CD193 was up-regulated 3.7-fold in virgin rats 7 days after VD (p=0.002)	RT-PCR	Lenis et al. 2013
CD195	GE	Lewis rats, 9 weeks, virgins, primiparous	18	18	Urethra	CD195 expression was increased 3.1-fold in virgin rats 3 days after VD compared to virgin rats without VD	RT-PCR	Lenis et al. 2013
Cholesterol	PE	Human	138	137	Serum	Cholesterol SUI 225.54 Control 225.92 p-value 0.927	Autoanalyzer	Augoulea et al. 2015
CHOP	GE and PE	Human	10	10	Anterior vaginal wall	Higher CHOP gene and protein expression in women with SUI, compared with control subjects (P<0.05)	Western blot and RT-PCR	Zhou et al. 2018
COL1A1	GV	Human	50	50	Blood	G/T type of transcription factor Sp1-binding site polymorphism of COL1A1: SUI G allelle 55 (27.5%), vs. Control 71 (35.5%) , T allele SUI 45 (22.5%), vs. Control 29 (14.5%) p=0.019, GG SUI 13 (26%), vs. Control 29 (58%), GT 29 (58%), vs. Control 13 (26%), TT 8 (16%), vs. Control 8 (16%), p=0.0023 The comparison between the study and control groups showed higher prevalence of GT genotype in women …	2-step PCR	Skorupski et al. 2006
	GV	Human	45	45	Blood	GG SUI 14 (31.3%), vs. Control 25 (55.6%), GT SUI 26 (57.8%) vs. Control 19 (42.2%), TT SUI 5 (11.1%), vs. Control 1 (2.2%), p=0.041, G allele SUI 54 (60%) vs. Control 69 (76.7%), T allele SUI 36 (40%), vs. Control 21 (23.3%), p=0.016. Odds ratio for SUI TT genotype 8.93 (CI 0.95, 84.24), GT genotype 2.44 (1.01, 5.90), t allele 2.19 (1.15, 4.18). COLIA1 Sp1 polymorphism is associated with increas…	Gel electrophoresis	Sioutis et al. 2011
	GV	Human	19	19	Serum	The rs1800012 SNP in the COL1A1 gene was almost equally distributed and present in five cases versus four controls (heterozygous and homozygous) (p = 0.24).	Sanger sequencing	Reischer et al. 2020
	GE	Wistar rats, female, +/- 120days old, weighing 250g	17	17	Urethra	Gene expression: No significant difference in Col1a1 between SUI vs. control.	Real-time RT-qPCR	Bilhar et al. 2018
COL3A1/Col3a1	GE and PE	Wistar rats, female, +/- 120days old, weighing 250g	17	17	Urethra	Gene expression: No significant difference in Col3a1 between SUI vs. control.	Real-time RT-qPCR	Bilhar et al. 2018
Collagen	PE	Human	7	4	Fibroblasts derived from the Skin biopsies lower abdominal wall	Total collagen production cultured fibroblasts SUI 8.1+/-1.5ug of collagen/24u versus 11.8+/-3.2 in controls P<0.034 and 0.073 resp.	High pressure liquid chromatography, sircol red.	Falconer et al. 1994
	PE	Human	36	25	Periurethral vaginal wall biopsy	SUI collagen content median 29% (range 14.1-53), control 39.7% (19.6=54.2) p<0.0001	SDS gel electrophoresis densitometry, hydroxyproline assay, LKB 4400 amino acid analyser	Keane et al. 1997
	PE	Human	12	13	Periurethral vaginal wall biopsy	No significant difference between SUI and control	Biochemistry	Falconer et al. 1998b
	PE	Human	14	12	Biopsies of the lower abdominal skin and endopelvic fascia	Percent collagen synthesized by endopelvic fascia fibroblasts SUI 53.9 +/- 2.4, vs. control 53.7 +/- 2.5, percent collagen synthesized by skin fibroblasts SUI 53.2 +/- 1.7 vs. Control 55.6 +/- 4.9	Liquid scintillation counting (LSC)	Chen et al. 2004a
	PE	Sprague-Dawley rats, virgin	12	10	Urethra, bladder neck, bladder	Collagen urethra SUI 13.1+/-1.1%, vs 10.5+/- 2.0 (NS), bladder neck SUI 11.2 +/- 1.6 vs. 6.8 +/- 0.8 p<0.05), Bladder SUI 8.5 +/- 0.7 vs. 7.5 +/- 0.7 (NS)	Immunohistochemistry	Sievert et al. 2001
	PE	C57BL/6 strain mice, female, 6-8 weeks, virgin	12	6	Urethra	Expression was significantly decreased in the 8 mm VD group and decreased in the 3 mm VD group as compared with that in the non-instrumented control group.	Immunofluorescence staining and Western blot	Chen et al. 2012
	PE	Sprague-Dawley rats, 2 months old, 280-330 g, primiparous, at gestational day 16, SUI group underwent OVX	6	6	Bladder-urethra complex	Higher protein expression in SUI group compared to controls	Histology	Wan et al. 2017
Collagen 1	GE	Human	6	6	Periurethral vaginal biopsy	Gene expression was twice as high in SUI group compared to controls	Northern blot	Falconer et al. 1998a
	GE	Human	6	6	Periurethral vaginal biopsy	No significant difference between SUI group and controls	Northern blot	Falconer et al. 1998b
	PE	Human	32	26 with POP (20 no POP or SUI)	Pubocervical fascia bladder neck	Signifcant reduction of collagen type I in about 53% patients with GSI and pelvic relaxation (group I) compared to those from groups 2 and 3 (p<0.01)	Immunohistochemistry	Liapis et al. 2000
	PE	Human	30	24	Endopelvic fascia at the level of the bladder neck	There were no significant differences in the quantity of collagen type I between the SUI and control groups. SUI 1+ 40%, 2+ 36.7%, 3+ 23.3%, control 1+ 45.8%, 2+ 41.7%, 3+ 12.5%	Immunohistochemistry and histology	Cor et al. 2003
	GE and PE	Human	42	26	Pubocervical fascia at the level of bladder neck	mRNA collagen 1 SUI 155.9 +/- 26.0 % vs. Control 161.5 +/- 21.6% p>0.05 (Mean compared to housekeeping gene GAPDH), protein expression: Collagen type 1 SUI 45.5 +/- 4.3 % vs. Control 59.7 +/- 5.2% p<0.01	Densitometry, RT-PCR	Bakas et al. 2004
	PE	Human	16 (8pre-m/8post-m)	16 (8pre/8post)	Peri-urethral	Collagen type 1: in the premenopausal incontinent patients, a moderate staning that, instead in the premenopausal continent patients was intense. Level of expression in postmenopausal incontinent patients and postmenopausal continent patients was lower compared with samples from premenopausal patients (continent and incontinent).	Immunohistochemistry	Trabucco et al. 2007
	GE and PE	Human	24 (12 pre- and 12 post-menopausal women)	14 (8 pre- and 6 post-menopausal)	Para-urethral	mRNA expressions of collagen I were lower in the SUI group, but these differences did not reach significance. Protein expression: no significant difference	Immunohistochemistry and RT-PCR	Soderberg et al. 2010
	PE	Human	30	30	Cardinal ligaments, uterosacral ligaments and paraurethral tissues	Expression of collagen type 1: POP+SUI: cardinal ligament 79.42 +/- 6.12 vs. control 124.56 +/- 5.39 p<0.01, sacral ligament SUI+POP 71.91 +/- 4.86 vs. contr 123.74 +/- 5.65 p<0.01, paraurethral tissue SUI+POP 80.28 +/- 4.76 vs. control 116.57+/- 5.22 p< 0.01.	Immunohistochemistry	Han et al. 2014
	PE	Human	28	30	Anterior vaginal wall	Collagen 1 positive staining SUI 8 (28.6%), control 9 (30%) p=0.905	Immunohistochemistry	Pantatosakis et al. 2016
	GE and PE	Human	18	8	Primary cell cultures of periurethral vaginal wall	Protein expression: collagen 1 SUI stage 2 and 3 decreased vs control p<0.001, mRNA expression: Collagen 1 SUI stage 2 and 3 decreased vs. control p< 0.001	Immunofluorescence staining, western blot, RT-q-PCR	Li et al. 2019a
	GE and PE	Human	5	5	Anterior vaginal wall	mRNA expression: collagen I were significantly decreased in the SUI group compared to the control group (P < 0.01). Protein expression: collagen I decreased in the SUI group as compared with the control group, P < 0.01	Immunohistochemistry, Q-RT-PCR, ELISA	Wang et al. 2019
	GE and PE	C57BL/6 mice, 8 weeks	15	15	Anterior vaginal wall	After VD, there were significant decreases in both protein and mRNA expression of collagen I	Western blot, RT-PCR	Min et al. 2017
	PE	WT (Nfe2l2+/+) female C57BL/6 mice and Nfe2l2−/− mice, 8-10 weeks, virgin	30 (3x10)	30 (3x10)	Anterior vaginal wall	The protein levels of COL1A1 of mice in the WT-VD group were significantly lower than those in the WT-NC, WT-Sham, KO-NC, and KO-Sham groups, but significantly higher than those in the KO-VD group.	Western blot	Tang et al. 2017a
	GE and PE	C57BL/6 mice, WT, 8-10 weeks, virgin	15	15	Urethras and anterior vaginal walls	mRNA and gene expression were lower in SUI group compared to controls	Western blot and quantitative PCR	Tang et al. 2017b
	GE	Sprague-Dawley rats, female, weighing 252–330g, adult	36	18	Urethra	mRNA levels of collagen 1a significantly increased in the urethra only in the VD (3 times) group compared with the sham group.	RT-PCR	Yoshikawa et al. 2017
	GV and PE	C57BL/6 mice, virgin, and Cav 3.2−/− mice, 8-10weeks	15	15	Anterior vaginal walls	Decreased expression in SUI group(WT) compared to the tissues of normal mice(WT).	Immunohistochemistry, immunofluorescence	Li et al. 2019b
	PE	Sprague Dawley rats, 8weeks, SUI group underwent OVX	5	5	Urethra and bladder	Lower protein expression in SUI group compared to controls	Western blot	Zhang et al. 2020a
Collagen 3	PE	Human	6	4	Skin of posterior fourchette at midline, right uterosacral ligament, right round ligament	SUI POP uterosacral ligament 17%+/-7, perineum skin 21%+/-9, round ligament 17%+/-8, vs control 21+/-8, 29+/-10, 22+/-8 resp. (P<0.05)	Quantitative 2-D CNBr peptide mapping	Bergman et al. 1994
	GE	Human	6	6	Periurethral vaginal biopsy	Gene expression was twice as high in SUI group compared to controls	Northern blot	Falconer et al. 1998a
	GE	Human	6	6	Periurethral vaginal biopsy	No significant difference in mRNA expression between SUI and control group.	Northern blot	Falconer et al. 1998b
	PE	Human	34	32 with POP (28 no POP or SUI)	Paravaginal fascia and uterosacral ligaments	Quantity was significantly reduced in about 50% of women with GSI and pelvic relaxation in samples from the paravaginal fascia and 47% in samples from the uterosacral ligaments compared to women of groups 2 and 3, p < 0.05. While significant reduction of collagen type III was found in only 3.5% of the patients of control group in both sites of biopsy	Immunohistochemistry	Liapis et al. 2001
	PE	Human	30	24	Endopelvic fascia at the level of the bladder neck	No significant differences in the quantity of collagen type III between the SUI and control groups. SUI 1+ 30%, 2+50%, 3+ 20%, control 1+ 33.3%, 2+ 29.2%, 3+ 37.5%.	Immunohistochemistry and histology	Cor et al. 2003
	GE and PE	Human	42	26	Pubocervical fascia at the level of bladder neck	mRNA collagen type 3 SUI 144.1 +/- 19.2% vs. control 140.4 +/- 20.5%, p>0.05 (MEAN compared to housekeeping gene GAPDH), protein expression: Collagen type 3 SUI 47.3 +/- 5.1% vs. Control 58.6 +/- 4.7% p<0.05	Densitometry, RT-PCR	Bakas et al. 2004
	PE	Human	13	12	Anterior vaginal wall at the level of the bladder neck	Collagen type 3: SUI Stainin g(-) 7 (53.8%), (+) 5 (38.5%), (++) 1 (&,7%), Control (+) 2 (16,7%) (p=0.097), (+) 3(25%) P=0.673, (++) 7 (58,3%) p=0.011	Immunohistochemistry	Song et al. 2007
	GE and PE	Human	24 (12 pre- and 12 post-menopausal women)	14 (8 pre- and 6 post-menopausal)	Para-urethral	mRNA expressions of collagen III were lower in the SUI group, but these differences did not reach significance. Protein expression no significant differences between SUI and controls	Immunohistochemistry and RT-PCR	Soderberg et al. 2010
	PE	Human	30	30	Cardinal ligaments, uterosacral ligaments and paraurethral tissues	Expression of type 3 collagen cardial ligament SUI+POP 65.90 +/- 4.11 vs. controle 126.06 +/- 4.83 p< 0.01, sacral ligamtn SUI+POP 69.94 +/- 4.22 vs. control 115.31 +/- 5.53 p< 0.01, paraurethral tissue SUI+POP 79.59 +/- 3.83 vs. control 122.44 +/- 4.17 p< 0.01	Immunohistochemistry	Han et al. 2014
	PE	Human	28	30	Anterior vaginal wall	Collagen 3 positive staining SUI 6 (21.4%), control 11 (36.7%), p=0.203	Immunohistochemistry	Pantatosakis et al. 2016
	GE and PE	Human	18	8	Primary cell cultures of periurethral vaginal wall	mRNA expression: collagen 3 SUI stage 2 and 3 decreased vs. control p< 0.001, Protein expression: collagen III SUI stage 2 and 3 decreased vs control p<0.001.	Immunofluorescence staining, western blot, RT-q-PCR	Li et al. 2019a
	GE and PE	Human	5	5	Anterior vaginal wall	mRNA expressions: collagen III significantly decreased in the SUI group compared to the control group (P < 0.01). Protein expression: collagen III decreased in the SUI group compared with control group P < 0.01	Immunohistochemistry, Q-RT-PCR, ELISA	Wang et al. 2019
	GE and PE	C57BL/6 mice, 8 weeks	15	15	Anterior vaginal wall	After VD, there were significant decreases in both protein and mRNA expression of collagen III	Western blot, RT-PCR	Min et al. 2017
	PE	WT (Nfe2l2+/+) female C57BL/6 mice and Nfe2l2−/− mice, 8-10 weeks, virgin	30 (3x10)	30 (3x10)	Anterior vaginal wall	Protein levels of COL3A1 in the WT-VD group were significantly lower than those in the WT-NC, WT-Sham, KO-NC, and KO-Sham groups, but significantly higher than those in the KO-VD group.	Western blot	Tang et al. 2017a
	GE and PE	C57BL/6 mice, WT, 8-10 weeks, virgin	15	15	Urethras and anterior vaginal walls	mRNA and gene expression were lower in SUI group compared to controls	Western blot and quantitative PCR	Tang et al. 2017b
	GE	Sprague-Dawley rats, female, weighing 252–330g, adult	36	18	Urethra	mRNA levels of collagen 3a were significantly increased in the urethra only in the VD (3 times) group compared with the sham group.	RT-PCR	Yoshikawa et al. 2017
	GV and PE	C57BL/6 mice, virgin, and Cav 3.2−/− mice, 8-10weeks	15	15	Anterior vaginal walls	Decreased expression of collagen III (p<0.001) in WT-VD group compared to the tissues of normal mice (WT normal control).	Immunohistochemistry, immunofluorescence	Li et al. 2019b
	PE	Sprague Dawley rats, 8weeks, SUI group underwent OVX	5	5	Urethra and bladder	Lower protein expression in SUI group compared to controls	Western blot	Zhang et al. 2020a
Collagen a1(III)/a1(I) synthesis	PE	Human	14	12	Biopsies of the lower abdominal skin and endopelvic fascia	The collagen III/I synthesized by endopelvic fascia fibroblasts derived from women with SUI was 0.40 +/- 0.05 vs. controls 0.45 +/- 0.06. The collagen III/I synthesized by skin fibroblasts derived from women with SUI and controls was 0.20 +/- 0.04 and 0.24 +/- 0.15 resp. No significant difference	Electrophoresis using SDS-PAGE gels and Liquid scintillation counting (LSC)	Chen et al. 2004a
Collagen fibers	PE	Human	14	12	Uterosacral ligaments and serum	No significant differences in percentages of collagen fibers between the groups	Histology	Suzme et al. 2007
	PE	Sprague-Dawley rats, female, 8 weeks old	10	10	Anterior vaginal wall	Collagen fibers in the anterior vaginal wall of blank rats were long, well organized and tightly arranged bundles, collagen fibers in rats after natural delivery showed discontinuous and disorganized structure.	Histology	Wang et al. 2015
	PE	Sprague-Dawley rats, female, age matched, 200–250g, virgin	7	7	Urethra	Distribution: SUI group thinnest: 33.0+/-2.2%; intermediate: 40.7+/-2.1%; thickest: 26.4+/-3.0%, Control thinnest: 30.9+/-0.8%; intermediate: 23.4+/-1.1%; thickest: 44.8+/-1.3%, significantly more intermediate fibers and significantly fewer thick fibers after injury compared to sham injured rats.	Histology	Song et al. 2016
Collagen 1/3 ratio	PE	Sprague-Dawley rats, pregnant, 8weeks old, primiparous, SUI group underwent OVX	20	20	Urethra	SUI significantly lower collagen 1/3ratio compared to controls	Western blot	Li et al. 2012a
	PE	Sprague-Dawley rats, pregnant, 8weeks old, primiparous, SUI group underwent OVX	14	14	Urethrovaginal tissue	The ratio of collagen I/III in the urethra was decreased in the SUI group relative to sham animals.	Histology	Li et al. 2012b
	PE	Human	36	25	Periurethral vagina	Type I/III ratio: SUI 65:35, control 71:29 (p0.0008)	SDS gel electrophoresis densitometry, hydroxyproline assay, LKB 4400 amino acid analyser	Keane et al. 1997
Collagen VII	PE	Human	10	8	Arcus tendineus fasciae pelvis (ATFP) and rectus muscle external fascia (RMEF)	Average degree of disintegration of collagen VII in RMEF of SUI =5 (5-4) vs. Control 5 (normal structure), ATFP of SUI 2 (4-0)(2=severely disintegrated) vs. Control 5. No p-values mentioned	Immunofluorescence	Radziszewski et al. 2005
Collagenase activity	PE	Human	56	26	Pubocervical and vesicovaginalfascia	Total collagenase activity SUI 11.53+/- 5.19, vs control 14.0 +/-7.63 p=0.3 ug collagen digested per min per gram of wet fascial tissue	Telopeptide-free tritium-labeled collagen substrate of Dean and Woessner	Rechberger et al. 1998
Creatine phosphokinase	PE	Sprague–Dawley rats, female, 6months old, weighing 300–350 g, virgin	40	10	Serum	Day 7 SUI CK U/L) 4513.0 +/- 1662.7 vs. control 872.2+/- 300.3, p<0.01	Automated biochemical analysis	Huang et al. 2013a
CXCL12	GE	Lewis rats, 9 weeks, virgins, primiparous	18	18	Urethra	CXCL12 was up-regulated in virgin rats 3 days after VD compared to the same group immediately after VD (p=0.045)	RT-PCR	Lenis et al. 2013
CXCR4	GE	Lewis rats, 9 weeks, virgins, primiparous	18	18	Urethra	CXCR4 expression was similarly increased 3.1-fold in virgin rats 7 days after VD (p=0.001)	RT-PCR	Lenis et al. 2013
CYP-17	GV	Human	91	66	Blood	No statistical significant associations	PCR	Cornu et al. 2011
CYP-19	GV	Human	91	66	Blood	No statistical significant associations	PCR	Cornu et al. 2011
D4-Androstendione (D4A)	PE	Human	138	137	Serum	D4A (ng/dl) SUI 146.07 (+/-52.63) control 159.99 (+/-42.62) p-value 0.017	ELISA, electrochemiluminescence immunoassay	Augoulea et al. 2015
Decorin	GE	Human	6	6	Periurethral vaginal biopsy	No significant difference between SUI and controls	Northern blot	Falconer et al. 1998a
	GE	Human	6	6	Periurethral vaginal biopsy	No significant difference between SUI and controls	Northern blot	Falconer et al. 1998b
	GE	Human	6	7	Anterior vaginal wall at the level of the bladder neck	mRNA expression significantly reduced in premenopausal SUI+POP vs. Control (p<0.05), comparison of SUI+POP pre+postmenopausal vs. control (=all premenopausal) no significant difference.	RT-PCR	Song et al. 2007
	GE and PE	Human	31 (15 prol. phase/ 16 secr. phase) differs per assays	31 (17 prol. phase/14 secr. phase) differs per assays	Peri-urethral vaginal mucosa	RT-PCR: Proliferative phase SUI 1.19+/-0.28 (N=8) vs. control (N=11) 0.43+/-0.076 p=0.05, secretory phase SUI (N=9) 2.16+/-0.74 vs. control 0.26+/-0.5 (N=9) p=0.02. Protein expression in seven pairs showed a higher density in SUI compared with control in the secretory phase. No difference in the proliferative phase	RT-PCR, immunohistochemistry , immunofluorescence and western blotting	Wen et al. 2007
	PE	Human	24 (12 pre- and 12 post-menopausal women)	14 (8 pre- and 6 post-menopausal)	Para-urethral	No significant differences between the groups	Immunohistochemistry	Soderberg et al. 2010
	PE	Human	28	30	Anterior vaginal wall	Decorin positive staining SUI 3(10.7%), control 10 (33.3%), p=0.039	Immunohistochemistry	Pantatosakis et al. 2016
Desmin	GE and PE	Wistar rats, female, +/- 120days old, weighing 250g	17	17	Urethra	Gene expression: No significant difference in SUI vs. Control. Protein expression: Regarding Desmin, a lower proportion of marked muscle area was observed in the Trauma 7D group compared to the Control group (P = 0.03)	Real-time RT-qPCR and immunohistochemistry	Bilhar et al. 2018
DHEAS	PE	Human	47	47	Serum	DHEAS mean +/-SD SUI 0.99+/-0.64, control 0.95+/-0.72 ug/ml, p-value 0.76	Electrochemiluminescence immunoassay	Bodner-Adler et al. 2017
Elafin	GE and PE	Human	17	19	Periurethral vaginal wall	Gene expression: Affimetrix, RT-PCR: increased in SUI compared to controls, p=0.03, Protein expression: confirmed by Western blot (no quantitative data provided).	Affymetrix microarray, RT-PCR, western blot, QC-PCR, immunofluorescence	Chen et al. 2006
Elastase activity	PE	Human	6	6	Peri-urethral vaginal wall	Elastolytic activity SUI/pop (N=6) mean 0.016 +/- SE 0.004), control (N=6) 0.013 +/- 0.003 (p=0.70)	Elastase assay	Chen et al. 2004b
	PE	Human	22 (8 secr.; 14 prol. phases)	(9 secr.; 18 prol. phases)	Periurethral vaginal wall	There was no difference in total elastase activity between control and SUI tissues in either proliferative or secretory phase	spectrophotometry, Western blot	Chen et al. 2007
Elastin/ELN	PE	Human	30	24	Endopelvic fascia at the level of the bladder neck	Morphometric analysis of the elastic fibers: SUI 3.81 +/- 0.6% and in controls 5.93 +/-0.92%	Immunohistochemistry and histology	Cor et al. 2003
	GE and PE	Human	22 (8 secr.; 14 prol. phases)	(9 secr.; 18 prol. phases)	Periurethral vaginal wall	No significant difference	Standard elastin protein microassay	Chen et al. 2007
	PE	Human	28	30	Anterior vaginal wall	Elastin positive staining SUI 3 (10.7%0, control 15 (50%) p=0.001	Immunohistochemistry	Pantatosakis et al. 2016
	GV	Human	SUI 5, SUI +POP 59	323	Blood	No association with ELN site (rs10949834) and SUI	Real-time PCR	Khadzieva et al. 2018
	PE	Sprague Dawley rats, 8weeks, SUI group underwent OVX	5	5	Urethra and bladder	Higher protein expression in SUI group compared to controls	Western blot	Zhang et al. 2020a
	PE	C57BL/6 strain mice, female, 6-8 weeks, virgin	12	6	Urethra	Expression was significantly decreased in the 8 mm VD group and decreased in the 3 mm VD group as compared with that in the non-instrumented control group.	Immunofluorescence staining and Western blot	Chen et al. 2012
	PE	WT (Nfe2l2+/+) female C57BL/6 mice and Nfe2l2−/− mice, 8-10 weeks, virgin	30 (3x10)	30 (3x10)	Anterior vaginal wall	Protein levels of elastin in the WT-VD group were significantly lower than those in the WT-NC, WT-Sham, KO-NC, and KO-Sham groups, but significantly higher than those in the KO-VD group	Western blot	Tang et al. 2017a
eNOS	PE	Sexually mature white laboratory female rats, 300g	20	20	Bladder	DAY 14: eNOS endothelium SUI 0.38 +/- 0.07 vs. Control 0.93 +/- 0.11 p<0.001, DAY 28: eNOS endothelium SUI 0.25 +/- 0.01 vs. control 0.99 +/- 0.03 p<0.01	Immunohistochemistry	Latsyna et al. 2018
ESR-A (1)	GE and PE	Human	12 (4 pre-menopausal; 8 post-m)	11 (6 pre-m; 5 post-m)	Para-urethral	Gene and protein expression showed no differencesn in SUI compared to control groups.	Immunohistochemistry, RT-PCR	Soderberg et al.2007
	PE	Human	31 (12 pre-m and 19 post-m)	26 (12 pre-m and 14 post-m)	Anterior vaginal wall, 1–2 cm from the uterine cervix, and mucosa, submucosa, connective tissue, and smooth muscle	Epithelia premenopausal SUI 2.10 +/-1.06 vs. Control 2.73 +/-0.65 p>0.05, postmenopausal SUI 2.33 +/-0.97 vs. control 2.10 +/- 0.90 p>0.05, endothelia premenopausal SUI 0.60 +/- 0.42 vs. control 1.09 +/- 0.70 p<0.01, postmenopausal SUI 0.23 +/-0.20 vs. control 0.39 +/- 0.28 p>0.05, smooth muscle cells: premenopausal SUI 0.43+/-0.29 vs. control 0.98 +/- 0.56 p<0.01, postmenopausal SUI 0.34+/- 0.27…	Immunohistochemistry	Xie et al. 2007
	GV	Human	91	66	Blood	No statistical significant associations	PCR	Cornu et al. 2011
	PE	Human	28	30	Anterior vaginal wall	ESRR-a positive staining SUI 13 (46.6%) vs. Control 13 (43.3%) p=0.813	Immunohistochemistry	Pantatosakis et al. 2016
	GE and PE	Human	49	32	Paraurethral connective tissue	Gene expression (pg RNA/ugDNA premenopausal SUI (N=6) 17.12 +/- 26.13 vs. control (N=13) 67.65+/- 84.78 p<0.05, postmenopausal SUI (N=13) 14.48 +/- 5.7 vs. control (N=11) 43.31 +/- 74.19 P>0.05, protein expression (%) Premenopausal SUI (n=22) 24.68 +/- 11.49 vs. control (n=16) 33.24 +/- 17.95 p>0.05, postmenopausal SUI (N=27) 28.76 +/- 10.24 vs. control (n=16) 27.91 +/- 18.43 p>0.05	Immunohistochemistry, RT-PCR	Adamiak et al. 2018
	PE	C57BL/6 Virgin female mice, 6-8weeks, weight 25–40g, virgin, some models underwent OVX	6x3	6	Urethra	ESR-a expression was significantly increased in the VD (P< 0.01) and VD + OVX (P< 0.05)groups	Immunofluorescence staining and Western blot	Chen et al. 2014a
	GV and PE	ACTB-Cre/ERα knockout (ERα−/−) mice and WT (Erα +/+) mice, 8 weeks old, virgin	6x2	6	Urethra	Compared to ERα+/+ group, our data showed that LPP and MUCP values were slightly decreased in the ERα+/− heterozygote female group without statistical significance. By contrast, LPP and MUCP values were significantly decreased in the ERα−/− group compared with the ERα+/+ group. We identified 11 urethra proteins differentially expressed with statistical significance in ERα+/+ and ERα−/− female mic…	Clinical evaluation and LPP measurement, immunohistochemistry and western blot	Chen et al. 2015
ESR-B (2)	GE and PE	Human	12 (4 pre-menopausal; 8 post-m)	11 (6 pre-m; 5 post-m)	Para-urethral	RT-PCR ESR-b, the Ct values were totally undetectable. All together ER-b was poorly expressed, and, thus, not available for calculations for D-Ct values and group differences. Image analysis revealed a significant increase of ESR-b in the pre-menopausal incontinent group, p= 0.02 compared to pre-menopausal controls, well in agreement with the manual scoring.	Immunohistochemistry, RT-PCR	Soderberg et al.2007
	PE	Human	31 (12 pre-m and 19 post-m)	26 (12 pre-m and 14 post-m)	Anterior vaginal wall, 1–2 cm from the uterine cervix, and mucosa, submucosa, connective tissue, and smooth muscle	Epithelia pre SUI 1.70+/- 0.66, vs control 1.94+/- 0.58, p>0.05, post SUI 1.71+/-0.84 vs. control 1.64+/- 0.92 p>0.05, endothelia pre SUI 0.77 +/- 0.59, vs. control 1.62+/- 0.44 p<0.01, post SUI 0.55 +/- 0.47 vs. control 0.69 +/- 0.52 p> 0.05. smooth muscle cells pre SUI 0.74 +/- 0.58 vs. control 1.05 +/- 0.60 p>0.05, post SUI 0.36 +/- 0.32 vs. control 0.40 +/- 0.29 p>0.05, fibrocytes pre SUI 0.3…	Immunohistochemistry	Xie et al. 2007
	PE	Human	28	30	Anterior vaginal wall	ESR-b positive staining SUI 1 (3.6%), control 10 (33.3%), p=0.004	Immunohistochemistry	Pantatosakis et al. 2016
	GE and PE	Human	49	32	Paraurethral connective tissue	Gene expression: Premenopausal SUI (N=17) 13.99 +/- 22.31 vs. control (N=16) 6.4+/- 5.86 P>0.05, Postmenopausal SUI (N=14), 1.76 +/- 1.6 vs. control (N=14) 4.34 +/- 3.63 P>0.05, protein expression (%) Premenopausal SUI (n=22) 58.99 +/- 20.29, vs. control (N=16) 62.83 +/- 24.61 p>0.05, postmenopausal SUI (N=27) 62.08 +/- 21.47 vs. control (N=16) 58.24 +/- 20.46 p>0.05.	Immunohistochemistry, RT-PCR	Adamiak et al. 2018
	GE and PE	Human	5	5	Anterior vaginal wall	mRNA expressions of ERβ1, ERβ2, and ERβ3 in the SUI group were almost unchanged (P > 0.05). The mRNA expressions of ERβ5 significantly decreased in the SUI group compared to the control group (P < 0.01). Protein expression: ERβ1, ERβ2, and ERβ3 not examined. Of ERβ5 was significantly decreased in the SUI group as compared with the control group (P < 0.01)	Immunohistochemistry, Q-RT-PCR, ELISA	Wang et al. 2019
	PE	C57BL/6 Virgin female mice, 6-8weeks, weight 25–40g, virgin, some models underwent OVX	6x3	6	Urethra	ESR-B expression was significantly increased only in the VD + OVX (P< 0.05) group, compared to controls (not in VD only group)	Immunofluorescence staining and Western blot	Chen et al. 2014a
Estradiol-17b (E2)	PE	Human	16	20	Serum	Serum E2 (pg/ml) SUI 10.0+/-0, vs control 10.0 +/-0, vs POP 10.0 +/-0 (NS)	Enzyme immunoassay	Lang et al. 2003
	PE	Human	30	30	Serum	SUI Serum E2 pmol/l 151 (25-548), control (93 (14-445), NS	Radioimmunoassay	Edwall et al.2007
	PE	Human	31 (12 pre-m and 19 post-m)	26 (12 pre-m and 14 post-m)	Serum	Premenopausal SUI serum estradiol 210.2+/-169.5pmol/l vs. Control 543.8 +/- 220.8 p<0.01, postmenopausal 75.1+/-32.3 vs. Control 90.3+/- 51.7 p>0.05.	Not described	Xie et al. 2007
	PE	Human	138	137	Serum	E2 (pg/ml) 17.30 (+/-8.16) control 24.22 (+/- 8.99) p-value <0.001	Immunoassay	Augoulea et al. 2015
	PE	Human	47	47	Serum	fE2 mean +/- SD SUI 8.49+/-7.47, control 13.09+/-13.80 pg/ml, p-value 0.048	Electrochemiluminescence immunoassay	Bodner-Adler et al. 2017
	PE	Human	49	32	Serum	(pg/ml) SUI premenopausal 252.50 +/- 268.57, vs. control pre 217.08 +/- 273.02 P>0.05, postmenopausal SUI 62.00 +/- 79.65 vs. control 123.46 +/- 294.98 p>0.05	Radioimmunology (labelled commercial kits)	Adamiak et al. 2018
	PE	C57BL/6 Virgin female mice, 6-8weeks, weight 25–40g, virgin, some models underwent OVX	6x3	6	Serum	The plasma estradiol level on Day 21 was significantly decreased in the OVX and VD + OVX groups (P< 0.05) as compared with that in control group	ELISA	Chen et al. 2014a
Estrogen receptor	PE	Human	11	5	Vesico-vaginal fascia	Estrogen receptor mean +/-SD SUI 49,4 +/-14,8 fmol/mg protein vs control 29,6+/-13,1 (<p0.03)	ELISA	Rechberger et al. 1993
	PE	Human	16	20	Cardinal and uterosacral ligament	There was no significant difference in ER values among the postmenopausal SUI, POP, and control groups (P)0.05). ESR % in cardinal ligament SUI 9.64 +/-5.01 vs. Control 10.89 +/- 2.54 vs. POP 11.85 +/-2.89 (NS), uterosacral ligament SUI 11.12 +/- 6.13 vs. control 13.09 +/- 3.03, vs.POP 13.21 +/-3.46 (NS).	Immunohistochemistry	Lang et al. 2003
	PE	Human	6	10	Periurethral fascia in the inferior area of the bladder neck	ER SUI 0.33 +/- 0.17, control 1.86 +/- 0.83 p=0.02	Western blot and densitometry	Bai et al. 2004
	PE	Human	14	10	Tissue around levator ani muscle (connective tissue, smooth muscle, nerve fibers)	Connective tissue ER (%), SUI 1.1+/-1.0 vs. Control 1.4 +/- 5.6 P<0.01) (X+/- SD), Smooth muscle SUI 2.8+/- 3.0 vs. Control 4.7 +/- 4.7 P<0.01, nerve fibers SUI 2.7 +/- 3.4 vs. Control 5.7 +/- 1.9 P<0.01), not found in levator ani muscle itself (striated)	Immunohistochemistry	Zhu et al. 2004
ERK1	PE	Human	10	10	Anterior vaginal wall	Significantly lower p-ERK1 levels in anterior vaginal wall tissue from women with SUI compared with those without SUI (P<0.05 for each comparison)	Western blot	Huang et al. 2013b
	PE	Sprague-Dawley rats, pregnant, 8weeks old, primiparous, SUI group underwent OVX	20	20	Urethra	Significantly lower p-ERK1/2 and ERK1/2 in SUI compared to sham	Immunohistochemistry and western blot	Li et al. 2012a
ERK2	PE	Human	10	10	Anterior vaginal wall	Significantly lower p-ERK2 levels in anterior vaginal wall tissue from women with SUI compared with those without SUI (P<0.05 for each comparison)	Western blot	Huang et al. 2013b
	PE	Sprague-Dawley rats, pregnant, 8weeks old, primiparous, SUI group underwent OVX	20	20	Urethra	Significantly lower p-ERK1/2 and ERK1/2 in SUI compared to sham	Immunohistochemistry and western blot	Li et al. 2012a
FBLN5/Fibulin-5	GE	Human	24 (12 pre- and 12 post-menopausal women)	14 (8 pre- and 6 post-menopausal)	Para-urethral	Non-significant decrease in mRNA expression.	RT-PCR	Soderberg et al. 2010
	GV	Human	SUI 5, SUI +POP 59	323	Blood	FBLN5 alleles and haplotypes were associated with the development of each of POP, SUI, and CVI, as well as with complex manifestation of these pathologies.	Real-time PCR	Khadzieva et al. 2018
FBN1/fibrillin-1	GE and PE	Human	19 (11 prol.; 8 secr. phase)	17 (9 prol.; 8 secr. phase)	Periurethral vaginal wall	The level of fibrillin-1 mRNA expression was higher in the case group versus the control group in both the proliferative (a 30-fold increase, P = 0.04) and secretory phases (a 371-fold increase, P = 0.03). No differences in protein expression were found.	RT-PCR, immunohistochemistry, western blot	Wen et al. 2006
	GE and PE	Human	24 (12 pre- and 12 post-menopausal women)	14 (8 pre- and 6 post-menopausal)	Para-urethral	Threefold decrease in mRNA expression of fibrillin-1 in SUI vs. control, P = 0.03. Protein expression: The distribution of fibrillin-1 was more limited and the staining was weaker in the biopsies from premenopausal women with SUI compared to controls, postmenopausals the fibrillin-1 staining was very weak generally and varied more within both SUI- and control groups why no clear group difference …	Immunohistochemistry and RT-PCR	Soderberg et al. 2010
	GV	Human	SUI 5, SUI +POP 59	323	Blood	FBN1 (rs6493328) no significant association	Real-time PCR	Khadzieva et al. 2018
Fibrillin-2	GE and PE	Human	19 (11 prol.; 8 secr. phase)	17 (9 prol.; 8 secr. phase)	Periurethral vaginal wall	mRNA expression levels were similar between the two groups of women. No detection fibrillin-2 in the vaginal wall tissue by Western blot analysis.	RT-PCR, immunohistochemistry, western blot	Wen et al. 2006
Fibromodulin	PE	Human	16 (8pre-m/8post-m)	16 (8pre-m/8post-m)	Peri-urethral	Fibromodulin: in the premenopausal incontinent patients an intense staining while in the premenopausal continent patients the staining was moderately intense. Level of expression in postmenopausal incontinent patients and postmenopausal continent patients was weak compared with samples from premenopausal patients (continent and incontinent).	Immunohistochemistry	Trabucco et al. 2007
	GE and PE	Human	31 (15prol. phase/16 secr. phase) differs per assays	31 (17 prol. phase/14 secr. phase) differs per assays	Peri-urethral vaginal mucosa	RT-PCR proliferative phase SUI (N=8) 15.6+/- 5.2 vs. control 40.8+/-8.9 (N=9) p=0.03. Secr SUI (N=9 16.03+/-6.4 vs. control (N=9)16.5+/-4.2 p=0.95 all MEAN +/-SEM. FMOD expression in proliferative phase was lower in women with SUI in six matched tissue pairs. No difference in secretory phase	RT-PCR, immunohistochemistry , immunofluorescence and western blotting	Wen et al. 2007
	GE and PE	Human	24 (12 pre- and 12 post-menopausal women)	14 (8 pre- and 6 post-menopausal)	Para-urethral	mRNA expression lower in the SUI group, NS. Protein expression no significant difference between the groups	Immunohistochemistry and RT-PCR	Soderberg et al. 2010
	PE	Human	28	30	Anterior vaginal wall	Fibromodulin positive staining SUI 3 (10.7%), control 10 (33.3%), p=0.039	Immunohistochemistry	Pantatosakis et al. 2016
FSH	PE	Human	138	137	Serum	FSH (mIU/ml) SUI 67.82 (+/-23.23) Control 68.70 (+/-28.66) p-value 0.781	Immunoassay	Augoulea et al. 2015
	PE	Human	47	47	Serum	FSH mean +/- SD SUI 56.23+/-25.68, control 62.94+/-38.59 mU/ml, p-value 0.32	Electrochemiluminescence immunoassay	Bodner-Adler et al. 2017
	PE	Human	49 (numbers differ per analysis)	32 (numbers differ per analysis)	Serum	FSH Premenopausal SUI (N=22) 14.46 +/- 10.81(mIU/ml) vs. control (N=16) 18.50 +/- 10.56 p>0.05, postmenopausal SUI (N=27) 52.72 +/- 27.47 vs. Control post (N=16) 48.00 +/- 26.78 P>0.05	Radioimmunology (labelled commercial kits)	Adamiak et al. 2018
GAGs Glycosaminoglycans	PE	Human	14	12	Uterosacral ligaments	GAGs SUIPOP 1651+/-464ng/mg tissue vs. Control 1641+/-926 NS	Spectophotometry	Suzme et al. 2007
GRB2	GE and PE	Human	10	10	Periurethral vaginal wall	Significantly higher gene (p<0.01) and protein (p<0.01) expression in SUI, compared with control subjects	RT-PCR, western blot, densitometry	Liu et al. 2014
GSH-Px (glutathione peroxidase)	PE	Sprague-Dawley rats, 2 months old, 280-330 g, primiparous, at gestational day 16, SUI group underwent OVX	6	6	Bladder-urethra complex	Compared to the control group, the activities of GSH-Px were remarkably elevated in SUI rats (149.71 ± 13.09 versus 189.68 ± 18.80, respectively).	Immunohistochemistry	Wan et al. 2017
	PE	WT C57BL/6J and Nfe2l2-/- female mice, 8-10 weeks, virgins	15 (x4)	15 (x4)	Anterior vaginal wall	The activities of GSH-PX in the WT-VD7d group were significantly lower than those in the WT-NC, WT-Sham, KO-NC, and KO-Sham groups, but they were significantly higher than those in the KO-VD7d group. The activities of GSH-PX in the WT-VD14d group were significantly higher than those in the KO-VD14d group.	GSH-Px specific measurement kit	Tang et al. 2019
Glucose	PE	Human	138	137	Serum	Glucose SUI 94.52 control 94.2 (+/-10.76) p-value 0.804	Autoanalyzer	Augoulea et al. 2015
Glucose-regulated protein (GRP78)	GE and PE	Human	10	10	Anterior vaginal wall	Significantly lower gene and protein expression in postmenopausal women with SUI, compared with control subjects, p<0.05.	Western blot and RT-PCR	Zhou et al. 2018
GPx1	PE	C57BL/6 mice, WT, 8-10 weeks, virgin	15	15	Urethras and anterior vaginal walls	Expression levels GPx1 in urethra and anterior vaginal wall were significantly decreased after VD than in the NC group	Western blot	Tang et al. 2017b
HDL	PE	Human	138	137	Serum	HDL SUI 58.78, control 60.27 (+/-11.63),p-value 0.352	Autoanalyzer	Augoulea et al. 2015
Helical peptide a1 (I) 620-622, derived from collagen	PE	Human	23	39	24h urine	SUI 0.80+/- 0.13 mg/mg creatinine, control 0.49+/-0.06 μg/mg creatinine (P<0.02) (no age related changes).	Competitive enzyme immunoassay	Kushner et al. 2004
Hif-1a	GE	Lewis rats, 9 weeks, virgins, primiparous	18	18	Urethra	Hif-1a showed immediate up-regulation after VD and/or parturition. Hif-1a was also significantly up-regulated 2.1-fold in virgin rats but not in postpartum rats immediately after VD (p=0.001). It normalized by 3 days.	RT-PCR	Lenis et al. 2013
HO-1	PE	Sprague-Dawley rats, 2 months old, 280-330 g, primiparous, at gestational day 16, SUI group underwent OVX	6	6	Bladder-urethra complex	No significant differences between SUI and control.	Western blot	Wan et al. 2017
Proline	PE	Human	7	4	Bibroblasts derived from the Skin biopsies lower abdominal wall	H-proline was not significantly decreased in the cell layer (14% less), in the medium 40% less(p=0.052).	High pressure liquid chromatography, sircol red.	Falconer et al. 1994
Hydroxylysinoketonorleucine	PE	Human	36	25	Periurethral vagina	HLKNL (nmol/ml collagen) SUI 0.19 (0.11-0.51), control 0.31 (0.17-0.36) p<0.0001.	SDS gel electrophoresis densitometry, hydroxyproline assay, LKB 4400 amino acid analyser	Keane et al. 1997
Hydroxyproline	PE	Human	skin 8, lig rot 3	Skin 6, lig rot 7	Skin: lower margin pfannenstiehl and lig. rotundum	SUI skin mean 17.6 (or 17.3), lig. rotundum 8.7, vs controls 30.9 (or 28.9) and 11.6. Discrepancies in text	Stegeman & Stalder	Ulmsten et al. 1987
	PE	Human	11	5	Vesico-vaginal fascia	SUI 13.9+/- 2,6mug, control. 20.6 +/-2.4 (P<0.001)	Stageman and Stalder	Rechberger et al. 1993
	PE	Human	7	4	Fibroblasts derived from the Skin biopsies lower abdominal wall	Fibroblasts cultures established from SUI produced 30% less 3H-hydroxyproline-labeled protein than controls: in the cell layer (p=0.038) and in the medium (P=0.004)	High pressure liquid chromatography, sircol red.	Falconer et al. 1994
	PE	Human	15	16	Periurethral vaginal biopsy	SUI Mean +/-SD 17.9+/-6.2 vs. Control 13.5 +/-3.3 ug/mg wet weight (P=0.02)	Stegeman & Stalder	Falconer et al. 1998a
	PE	Human	12	13	Periurethral vaginal biopsy	No significant differences between SUI group and controls	Stegeman & Stalder	Falconer et al. 1998b
	PE	Human	56	26	Pubocervical and vesicovaginalfascia	SUI 107.8+/-26.6 control 131.7+/-28.6 p=0.0005, (mg collag/gram wet fascia)	Woessner method	Rechberger et al. 1998
	PE	Human	4	4	Anterior vaginal wall	60% decrease in total collagen content per miligram of protein in SUI women compared to controls	Spectrophotometry and Ryan and Woessner	Chen et al. 2002
	GE and PE	Human	22 (8 secr.; 14 prol. phases)	(9 secr.; 18 prol. phases)	Periurethral vaginal wall	No significant difference	Hydroxyproline assay	Chen et al. 2007
	PE	Human	14	12	Uterosacral ligaments	POP+SUI 114+/-48,7Umol/g tissue vs. Control 169+/-46.1 p<0.05)	Hydroxyproline assay (via hydrolyzation)	Suzme et al. 2007
	PE	Human	18	20	Full thickness of vaginal wall	Protein expression was lower in SUI group compared to controls	ELISA	Yang et al. 2018
ICTP: carboxyterminal telopeptide of type I collagen	PE	Human	31	31	Suburethral tissue, venous blood samples	Serum-ICTP SUI matched 2.5 (1.6-4.5), vs. control 2.5 (1.5-5.4) NS, Tissue-ICTP SUI matched 0.013 (0.004-0.047), vs. control 0.034 (0.007 -0.083) p<0.001	Radioimmunoassay	Edwall et al. 2005
	PE	Human	30	30	Suburethral tissue	SUI T-ICTP 0.13, control 0.08, NS	Radioimmunoassay	Edwall et al.2007
IGF-1	PE	Human	116	76	Serum	IGF-1 nl/ml mean +/- SD SUI 106.5 +/- 26.4 vs. Control 133.3 +/- 37.1 p< 0.001	ELISA	Ozbek et al. 2016
	PE	Sprague Dawley female rats, 8 weeks, weight 230-306 g	20 (not clear)	4	Serum	SUI mean +/- SE 881+/-50, Control 858+/-72 ng/ml	ELISA	Sumino et al. 2016
iNOS	PE	C57BL/6 Virgin female mice, 6-8weeks, weight 25–40g, virgin, some models underwent OVX	6x3	6	Urethra	iNOS expression was significantly increased in the VD (P< 0.05) and VD + OVX (P< 0.05) groups as compared with those in the control group	Immunofluorescence staining and Western blot	Chen et al. 2014a
	PE	C57BL/6 strain female mice, 6-8 weeks, virgin	4	4	Urethra	No significant changes in protein expression levels in VD group compared to controls	Western blot	Chen et al. 2014b
	PE	Sexually mature white laboratory female rats, 300g	20	20	Bladder	DAY 14: iNOS epithelium SUI 0.24 +/- 0.01 vs. Control no expression, endothelium no expression in both, interstitial cells SUI 1.04 +/- 0.11 vs. Control no expression, DAY 28: iNOS epithelium and endothelium no expression in both, interstitial cells SUI 0.88 +/- 0.02 vs. control no expression	Immunohistochemistry	Latsyna et al. 2018
Insulin	PE	Human	138	137	Serum	Insulin SUI 7.19 control 6.96 (+/-3.40) p-value 0.640	Immunoassay	Augoulea et al. 2015
IL-1	PE	Sprague Dawley rats, aged 12.8+/-1.2 weeks old	7	7	Urethra	IL-1 SUI 60.7 +/-11.0, controls 44.9+/- 6.0, p= ANOVA 0.013, NS between the two groups	Immunohistochemistry and western blot	Lo et al. 2020
IL-1B	GE	Sprague-Dawley rats, female, weighing 252–330g, adult	36	18	Urethra	Non-significant increase in mRNA levels of IL-1B were observed in VD (3 times) group compared with the sham group.	RT-PCR	Yoshikawa et al. 2017
IL-6	GE	Sprague-Dawley rats, female, weighing 252–330g, adult	36	18	Urethra	mRNA levels of IL-6 were significantly increased in the urethra only in the VD (3 times) group compared with the sham group.	RT-PCR	Yoshikawa et al. 2017
IL-8	GE	Lewis rats, 9 weeks, virgins, primiparous	18	18	Urethra	No significant difference in expression between SUI group and controls	RT-PCR	Lenis et al. 2013
Inositol-requiring enzyme 1(IRE1)	GE and PE	Human	10	10	Anterior vaginal wall	No differences in IRE1 protein expression between SUI and control patients.	Western blot	Zhou et al. 2018
Integrin B1	PE	Human	18	8	Primary cell cultures of periurethral vaginal wall	Integrin B1 protein expression lower in SUI stage 2 and 3 than controls p<0.001	Immunofluorescence staining, western blot	Li et al. 2019a
Ki67	GE	Wistar rats, female, +/- 120days old, weighing 250g	17	17	Urethra	No significant difference in SUI vs. Control.	Real-time RT-qPCR	Bilhar et al. 2018
LDH	PE	Sprague–Dawley rats, female, 6months old, weighing 300–350 g, virgin	40	10	Serum	LDH day 7 SUI 3338.0+/- 774.0 vs controll 959.8 +/- 154.2 p<0.01	Automated biochemical analysis	Huang et al. 2013a
LDL	PE	Human	138	137	Serum	LDL SUI 139.61, control 136.71 p-value 0.459	Autoanalyzer	Augoulea et al. 2015
Leptin	PE	Human	14	12	Serum	SUI+POP 30.7+/-13.2ng/ml vs. control 31.7+/-18.1 NS	ELISA	Suzme et al. 2007
LH	PE	Human	138	137	Serum	LH (mIU/ml) SUI 33.21 (+/-12.89) control 34.81 (+/-14.35) p-value 0.330	Immunoassay	Augoulea et al. 2015
	PE	Human	47	47	Serum	LH mean +/- SD SUI 32.6+/-13.87, control 32.0+/-14.41 mU/ml, p-value 0.39	Electrochemiluminescence immunoassay	Bodner-Adler et al. 2017
	PE	Human	49	32	Serum	LH Premenopausal SUI 22.71 +/- 20.59 vs. Control 21.00 +- 16.1 P >0.05. postmenopausal SUI 33.88 +/- 27.64 vs. Control 33.54 +/- 18.32 P>0.05	Radioimmunology (labelled commercial kits)	Adamiak et al. 2018
LOX-L1	GV	Human	94	87	Blood	rs1048661 (SmaI) region: SUI N=94, control N=87 G/G (n,%) SUI 32= 34%, control 32=37%, G/T SUI 20 =21% vs. Control 34 = 39%, T/T SUI 42=45%, vs. Control 21 =24% p=0.0056 allele G (n, %) SUI 84=47% vs, control 89=56%), T SUI 104 (53%), vs control 76 (44%) p=0.035. rs2165241 (BsrI) region SUI N=83, control N=69 C/C 30 =36%, vs. control 41=59%, C/T SUI 16 =19%, vs. control 15 =22%, T/T SUI 37=45% vs…	PCR and restriction fragment length polymorphisms (PCR-RFLP)	Ozbek et al. 2013
	GV	Human	SUI 5, SUI +POP 59	323	Blood	LOXL1 alleles and haplotypes were associated with the development of each of POP, SUI, and CVI, as well as with complex manifestation of these pathologies	Real-time PCR	Khadzieva et al. 2018
LOX	PE	C57BL/6 strain mice, female, 6-8 weeks, virgin	12	6	Urethra	Expression was significantly increased in the 8 mm VD group and increased in the 3 mm VD group as compared with that in the non-instrumented control group	Immunofluorescence staining and Western blot	Chen et al. 2012
LTBP-1/2	GE and PE	Human	19 (11 prol.; 8 secr. phase)	17 (9 prol.; 8 secr. phase)	Periurethral vaginal wall	LTBP-1 mRNA expression higher in control compared to SUI in proliferative phase (a 4-fold increase, P = 0.04, but lower in control compared to SUI in secretory phase (a 19-fold decrease, P = 0.04. LTBP-2 (2-fold increase) higher in control group in proliferative phase and lower in control group in secretory phase. Western blot: LTBP-1 protein expression higher in control compared to SUI in prolif…	RT-PCR, immunohistochemistry, western blot	Wen et al. 2006
Lumican	PE	Human	16 (8pre-m/8post-m)	16 (8pre-m/8post-m)	Peri-urethral	No sifnificant differences between SUI and controls	Immunohistochemistry	Trabucco et al. 2007
	GE and PE	Human	24 (12 pre- and 12 post-menopausal women)	14 (8 pre- and 6 post-menopausal)	Para-urethral	No sifnificant differences between SUI and controls	Immunohistochemistry and RT-PCR	Soderberg et al. 2010
Malondialdehyde (MDA)	PE	Sprague-Dawley rats, 2 months old, 280-330 g, primiparous, at gestational day 16, SUI group underwent OVX	6	6	Bladder-urethra complex and serum	MDA in the urethral sphincter was notably increased in SUI rats compared to control rats (3.31 ± 0.74 versus 1.50 ± 0.34). MDA, Serum MDA significantly elevated in SUI compared to control p<0.05.	MDA assay kit	Wan et al. 2017
	PE	C57BL/6 mice, 8 weeks, virgin	15	15	Urethra and anterior vaginal wall	MDA levels was increased in the VD group compared to controls p<0.05	Western blot	Li et al. 2018
	GV and PE	WT C57BL/6J and Nfe2l2-/- female mice, 8-10 weeks, virgins	15 (x4)	15 (x4)	Anterior vaginal wall	The levels of MDA in the WT-VD7d group were significantly higher than those in the WT-NC, WT-Sham, KO-NC, and KO-Sham groups, but they were significantly lower than those in the KO-VD7d group. The levels of MDA in the WT-VD14d group were significantly lower than their levels in the KO-VD14d group.	MDA specific measurement kit	Tang et al. 2019
Myosine heavy chain (MHC)	PE	Sprague Dawley rats, 8weeks, SUI group underwent OVX	8	8	Urethra and vagina	Significantly lower MHC in SUI compared to controls	Immunofluorescence	Zhang et al. 2020b
	PE	Sprague-Dawley rats, 8weeks, primiparous, SUI group underwent OVX	10	10	Urethra	Significant lower MHC density in SUI group compared to controls p<0.05.	Immunofluorescence	Yang et al. 2019
miR-93	GE	Human	10	10	Periurethral vaginal wall	Significantly lower gene expression in SUI, compared with control subjects, p<0.05.	RT-PCR	Liu et al. 2014
	GE	Human	18	20	Full thickness of vaginal wall	miR‑93 expression in the SUI group was decreased compared with the control group	RT‑qPCR	Yang et al. 2018
miR-124	GE	Human	10	10	Periurethral vaginal wall	Significantly lower gene expression in SUI, compared with control subjects, p<0.05.	RT-PCR	Liu et al. 2014
miR-330-3p	GE	Human	10	10	Periurethral vaginal wall	Significantly lower gene expression in SUI, compared with control subjects, p<0.05.	RT-PCR	Liu et al. 2014
MMP-1	GE and PE	Human	7	15	Anterior vaginal wall biopsies	SUI 80% increase in MMP-1 mRNA expression compared to control (p=0.05).	QC-RT-PCR	Chen et al. 2002
	PE	Human	4	3	Periurethral vaginal wall	No significant differences between SUI and controls	Western blot	Chen et al. 2003a
	GV	Human	155	111	Whole blood	MMP-1: 1G1G: SUI 58 (37,4%), vs. Controls 34 (30,6%), 1G2G SUI 60 (38.7%) vs. control 49 (44.1%), 2G2G SUI 37 (23.9%), vs. Control 28 (25.2%) p=0.5. Allel frequency allel 1G: SUI 177 (56.9%), control 116 (52,5%), Allel 2G SUI 134 (43,1%), control 105 (47,5%) p=0.31. Conclusion: G/GG polymorphisms of the coding gene promotor MMP-1 show no association with the risk of clinically significant SUI.	Restriction fragment length polymorphism (RFLP)	Skorupski et al. 2010
	GE and PE	Human	18	20	Full thickness of vaginal wall	The gene and protein levels of MMP1(p<0.01) were increased in the SUI group compared to controls	RT‑qPCR, Western blot, ELISA	Yang et al. 2018
	GE and PE	Human	5	5	Anterior vaginal wall	mRNA expression of MMP-1 was higher in the SUI group as compared with the control group (P < 0.01). Protein expression: MMP-1 was increased in the SUI group as compared with the control group P < 0.01	Immunohistochemistry, Q-RT-PCR, ELISA	Wang et al. 2019
	GV	Human	19	19	Serum	The homozygous rs1799750 SNP of the MMP1 gene was present in eight cases versus five controls (p = 0.18). The combination of the rs885786 SNP of the SERPINA5 gene and rs179970 SNP of the MMP1 gene was detected in ten cases and five controls (p = 0.072). Overall we identified a non-significant trend toward an association of a combined presence of these SNPs and SUI.	Sanger sequencing	Reischer et al. 2020
MMP-2	GE	Human	7	15	Anterior vaginal wall	NS difference between SUI and controls.	QC-RT-PCR	Chen et al. 2002
	PE	Sprague Dawley rats, aged 12.8+/-1.2 weeks old	7	7	Urethra	MMP-2 SUI 51.9 +/- 4.8, control 55.5 +/- 4.9 (p<0.001)	Immunohistochemistry and western blot	Lo et al. 2020
	GE	Sprague-Dawley rats, female, weighing 252–330g, adult	36	18	Urethra	No significant changes in mRNA levels of MMP-2 were observed in VD groups compared with controls.	RT-PCR	Yoshikawa et al. 2017
MMP-3	GE	Human	7	15	Anterior vaginal wall	NS difference between SUI and controls.	QC-RT-PCR	Chen et al. 2002
	GV	Human	149	109	Whole blood	MMP-3: SUI 5A5A 34 (22.8%) vs. Control 28 (25,7%), 5A6A SUI 95 (63,8%) vs. Control 65 (59,6%), 6A6A SUI 20 (13,4%), control 16 (14,7%), p=0.79. Allel frequency 5A: SUI 164 (54,9%), control 120 (55,3%), allel 6A SUI 135 (45,1%), control 97 (44,7%) p=0.91. Conclusion: 5A/6A promoter of the gene encoding MMP-3 show no association with the risk of clinically significant SUI.	Restriction fragment length polymorphism (RFLP)	Skorupski et al. 2010
MMP-9	GE	Human	7	15	Anterior vaginal wall	NS difference between SUI and controls.	QC-RT-PCR	Chen et al. 2002
	PE	Sprague-Dawley rats, pregnant, 8weeks old, primiparous, SUI group underwent OVX	14	14	Urethrovaginal tissue	MMP-9 was upregulated in SUI group compared to controls	Western blot	Li et al. 2012b
	GE	Sprague-Dawley rats, female, weighing 252–330g, adult	36	18	Urethra	mRNA levels of MMP-9 were significantly increased in the urethra only in the VD-3 (times) group compared with the sham group. The increase in MMP-9 of the VD-3 (times) group was statistically significant compared with the VD1 (time) group.	RT-PCR	Yoshikawa et al. 2017
MMP-13	GE	Sprague-Dawley rats, 2 months old, pregnant, primiparous, received OVX	10	14	Whole urethra	Q-PCR: 3.59 fold increase in SUI group, Microarray: 3.78fold increase in SUI group compared to controls (both NS)	Microarray analysis, Q-PCR	Lin et al. 2009
MnSOD	PE	C57BL/6 mice, WT, 8-10 weeks, virgin	15	15	Urethras and anterior vaginal walls	No significant difference in SUI compared to controls	Western blot	Tang et al. 2017b
MYH2	GE and PE	Wistar rats, female, +/- 120days old, weighing 250g	17	17	Urethra	Gene expression: No significant difference in SUI vs. Control. Protein expression: significantly lower protein expression in VD group compared to controls, p<0.05	Real-time RT-qPCR and immunohistochemistry	Bilhar et al. 2018
MYH11	GE and PE	Wistar rats, female, +/- 120days old, weighing 250g	17	17	Urethra	Gene expression: Myh11 gene was overexpressed in the trauma group in relation to the control at 7 days after trauma (P = 0.01). Protein expression: No significant difference in MYH11 between SUI and control.	Real-time RT-qPCR and immunohistochemistry	Bilhar et al. 2018
Myoblast determination gene (MyoD)	PE	Sprague-Dawley rats, 8weeks, primiparous, SUI group underwent OVX	10	10	Urethra	No expression in control group was seen, compared to visual expression in SUI group	Immunofluorescence	Yang et al. 2019
Myosin	PE	C57BL/6 strain female mice, 6-8 weeks, virgin	4	4	Urethra	Significant decrease in protein expression in SUI group compared to controls	Western blot	Chen et al. 2014b
Neuromuscular junctions (NMJ)	PE	Sprague Dawley rats, 8weeks, SUI group underwent OVX	8	8	Urethra and vagina	Significantly lower NMJ in SUI group compared to controls	Immunofluorescence	Zhang et al. 2020b
Neuron specific enolase	PE	Human	10	10	Periurethral and perirectal pubococcygeus muscle on the right and left sides	No significant differences in SUI compared to controls	Immunohistochemistry	Busacchi et al. 2004
Neuropeptide Y	PE	Human	10	10	Periurethral and perirectal pubococcygeus muscle on the right and left sides	NPY SUI +--, control ++- (both muscles)	Immunohistochemistry	Busacchi et al. 2004
	GE and PE	Human	13	13	Anterior and posterior vaginal wall near the fornix	There was a significant decrease in NPY expression between the SUI and control groups (P=0.033), particularly in the posterior vaginal epithelium in the SUI group. The mRNA expression of NPY in the vaginal wall in all groups was found to be negative.	Immunohistochemistry and DNA hybridization in situ	Zhu et al. 2008
	PE	Human	18	9	Anterior vaginal wall below the urethra	NPY SUI + POP (various degrees) staining -: 12, staining +:5, ++ and +++ 0, control staining - and = 0, staining ++ 2, staining +++ 7	Immunohistochemistry	Hu et al. 2012
	PE	Human	SUI 6, SUI+POP13	10	Pelvic floor ligaments (round, sacral and cardinal) and anterior vaginal wall connective tissue	SUI vs. Control, ligaments NS differences (round p=0.897, cardinal p=0.406, uterosacral p=0.458), vaginal mucosa p=0.005, POP+SUI vs. Control round p=0.002, cardinal p=0.016, uterosacral p=0.005, vaginal mucosa p=0.000. All decreased expression compared to controls	Immunohistochemistry	Zhang et al. 2019
	PE	Wistar rats, female, 8 weeks old	10	5	Pubococcygeal muscles, peripheral blood (supernatant)	Decreased NPY expression in SUI compared to controls (no significance level stated)	ELISA and Western blot	Zeng et al. 2019
Neutrophil elastase	GE and PE	Human	12 (differs per assay)	15 (differs per assay)	Peri-urethral vaginal wall	Human neutrophil elastase mRNA SUI/pop (N=11) mean 52.12 +/- SE 23.92 vs. Control (N=11) mean 109.51 +/- 50.38 p=0.32, also not significantly different protein expression (no quantitative data)	RT-PCR, western blot, QC-PCR	Chen et al. 2004b
	GE and PE	Human	22 (8 secr.; 14 prol. phases)	(9 secr.; 18 prol. phases)	Periurethral vaginal wall	Neutrophil elastase activity in the secretory phase was increased in SUI compared to controls, p=0.022. No significant differences in proliferative phase	Neutrophil Elastase Activity Assay	Chen et al. 2007
NGF	PE	Sprague Dawley rats, aged 12.8+/-1.2 weeks old	7	7	Urethra	NGF SUI 15.3 +/- 2.4, control 10.4 +/- 2.8 (p =not shown) (mean +/- SD)	Immunohistochemistry and western blot	Lo et al. 2020
	GE	Wistar rats, female, +/- 120days old, weighing 250g	17	17	Urethra	Gene expression: NGF significantly elevated in SUI compared to control	Real-time RT-qPCR	Bilhar et al. 2018
Nicotinic receptor (subunits)	GE	Sprague-Dawley rats, female, weighing 252–330g, adult	36	18	Urethra	mRNA levels of nicotinic receptor a-, B, yamma-, delta-, and ε-subunits were significantly increased in the urethra of both VD-1 (time) and VD-3 (times) groups compared with the sham group although there was no statistical difference in the expression of these transcripts between VD-1 (time) and VD-3 (time) groups.	RT-PCR	Yoshikawa et al. 2017
Nitric oxide, neuronal (nNOS)	PE	Human	20	20	Anterior vaginal wall epithelium and stroma	Epithelial SUI premenopausal 2.4+/- 0.5 vs. Control 4.4 +/- 0.5, SUI postmenopausal 1.4 +/- 0.5 vs. Control 3.5+/- 0.5 p=0.001, stromal SUI premenopausal 2.2 +/- 0.4 vs. Control 4.4+/- 0.5, SUI postmenopausal 1.3 +/- 0.5 vs. Control 3.6+/- 0.5 p=0.001	Immunohistochemistry	Ozcan et al. 2018
	PE	Sprague-Dawley rats, virgin	12	10	Outer urethra	SUI 3.0 +/- 0.2 versus control 5.5+/-0.5 p<0.05	Immunohistochemistry	Sievert et al. 2001
	PE	Sprague Dawley rats, 8weeks, SUI group underwent OVX	8	8	Urethra and vagina	Significantly lower protein expression in SUI group compared to controls	Immunofluorescence	Zhang et al. 2020b
	PE	C57BL/6 Virgin female mice, 6-8weeks, weight 25–40g, virgin, some models underwent OVX	6x3	6	Urethra	nNOS expression was significantly increased in the VD (P< 0.05) and VD + OVX (P< 0.05) groups as compared with those in the control group	Immunofluorescence staining and Western blot	Chen et al. 2014a
	PE	Sexually mature white laboratory female rats, 300g	20	20	Bladder	DAY 14: nNOS neurocytes SUI 0.18 +/- 0.09 vs. control 1.03 +/- 0.33. DAY 28: nNOS neurocytes SUI 0.15 +/- 0.01 vs. control 1.04 +/- 0.03 p<0.01.	Immunohistochemistry	Latsyna et al. 2018
NQO1	PE	Sprague-Dawley rats, 2 months old, 280-330 g, primiparous, at gestational day 16, SUI group underwent OVX	6	6	Bladder-urethra complex	No significant differences between SUI and control	Western blot	Wan et al. 2017
Nrf2	GV	WT (Nfe2l2+/+) female C57BL/6 mice and Nfe2l2−/− mice, 8-10 weeks, virgin	30 (3x10)	30 (3x10)	Anterior vaginal wall	There were no significant differences among the LPPs of mice in the WT-NC, WT-Sham, KO-NC, and KO-Sham groups. But the LPPs of mice in the WT-VD group were significantly lower than those in the WT-NC, WTSham, KO-NC, and KO-Sham groups, but significantly higher than those in the KO-VD group.	Clinical evaluation and LPP measurement	Tang et al. 2017a
	PE	C57BL/6 mice, WT, 8-10 weeks, virgin	15	15	Urethras and anterior vaginal walls	Expression levels of Nrf2 in urethra and anterior vaginal wall were significantly decreased after VD than in the NC group	Western blot	Tang et al. 2017b
	PE	Sprague-Dawley rats, 2 months old, 280-330 g, primiparous, at gestational day 16, SUI group underwent OVX	6	6	Bladder-urethra complex	No significant differences between SUI and control.	Western blot	Wan et al. 2017
	PE	C57BL/6 mice, 8 weeks, virgin	15	15	Urethra and anterior vaginal wall	VD significantly suppressed protein expression of Nrf2 in the VD compared with the control group p<0.05	Western blot	Li et al. 2018
	GV and PE	WT C57BL/6J and Nfe2l2-/- female mice, 8-10 weeks, virgins	15 (x4)	15 (x4)	Anterior vaginal wall	No difference in body weight. No significant differences in LPP among the WT-NC, WT-Sham, KO-NC, and KO-Sham groups. The LPP of mice in the WT-VD7d group was significantly lower than the LPP of mice in the WT-NC, WT-Sham, KO-NC, and KO-Sham groups, but it was significantly higher than the LPP of mice in the KO-VD7d group. Besides, the LPP of mice in the WT-VD14d group was significantly higher tha…	Clinical evaluation and LPP measurement	Tang et al. 2019
p38	PE	Sprague-Dawley rats, 8weeks, primiparous, SUI group underwent OVX	10	10	Urethra	No difference in protein expression between SUI and control.	Western blot	Yang et al. 2019
p53	PE	Human	6	10	Periurethral fascia in the inferior area of the bladder neck	SUI 1.25 +/- 0.67, control 4.71 +/- 2.40 p=0.01	Western blot and densitometry	Bai et al. 2004
Pituitary adenylate cyclase activating polypeptide-38 (PACAP)	PE	Human	17 (8 pre-m; 9 post-m)	20 (10 pre-m; 10 post-m)	Upper anterior vaginal wall at the bladder neck level	IHC: Staining density significantly lower staining density in pre and postmenopausal SUI pts versus controls (p<0.05). Radioimmunoassay ir-PACAP premenopausal SUI 164.41+/-25.17 vs. control 236.87 +/- 88.90 p< 0.05, postmenopausal SUI 142.56 +/- 31.40 vs. control 203.57 +/- 36.76 p<0.05 ir=immunoreactivities	Immunohistochemistry and radioimmunoassay	Hong et al. 2008
	PE	Human	40	40	Anterior vaginal wall	SUI positive rate 25% vs. Control 42.5% p<0.05	Immunohistochemistry	Fan et al. 2017
Pax7	PE	Sprague-Dawley rats, 8weeks, primiparous, SUI group underwent OVX	10	10	Urethra	Increased protein expression in SUI group compared to controls p<0.05	Immunofluorescence	Yang et al. 2019
Pepsin digestion	PE	Human	15	16	Periurethral vaginal wall biopsy	SUI 48.9% vs control 60.1% (p=0.02)	Biochemistry	Falconer et al. 1998a
PERK (protein kinase-like endoplasmic reticulum kinase)	GE and PE	Human	10	10	Anterior vaginal wall	Gene expression was significantly higher (p<0.05), also protein PERK and p-PERK expression levels were higher in women with SUI, compared with control subjects (P<0.05)	Western blot and RT-PCR	Zhou et al. 2018
PGP 9.5	PE	Sprague-Dawley rats, 10w old, mature, weight 250-300g, virgins	18	6	Urethra	The percentage of immunoreactive PGP 9.5 expression in entire staining for the normal, electrocauterization, pudendal denervation, and vaginal distension groups was 4.5% +/- 0.7%, 2.3% +/- 0.6%, 2.6% +/- 1.0%, and 3.9% +/- 0.9%, respectively. All treatment groups showed a significant decrease in PGP 9.5 expression compared with the normal group (P <.05), and this was particularly noticeable in th…	Immunohistochemistry	Hong et al. 2013
	PE	Sprague-Dawley rats, female, age matched, 200–250g, virgin	7	7	Urethra	Sham injured rats demonstrated abundant nerves in the urethra with PGP9.5 staining, with nerves present both between the EUS muscle fibers, and outside of the muscle fibers. In contrast, injured sham treated rats had fewer nerves and these nerves were located outside of urethral striated muscle fibers.	Histology and immunohistochemistry	Song et al. 2016
PICP: Carboxyterminal propeptide of type I procollagen	PE	Human	31	31	Suburethral tissue, venous blood samples	serum-PICP SUI matched 99.4 (56.6-207), vs. Control 124 (41.4-217) P<0.05), Tissue-PICP SUI matched 0.070 (0.012-0.305), vs. Control 0.114 (0.010-0.383) NS	Radioimmunoassay	Edwall et al. 2005
	PE	Human	30	30	Suburethral tissue	SUI T-PICP 0.20, control 0.45 (p<0.05)	Radioimmunoassay	Edwall et al.2007
PINP	PE	Human	14	12	Serum	PINP SUI+POP 59.0+/-39.8ug/l vs. control 61.3+/-28.4 NS	Radioimmunoassay	Suzme et al. 2007
PIINP	PE	Human	14	12	Serum	PIINP SUI+POP 6.48+/- 1.72ug/l vs. control 6.45+/- 1.83 NS.	Radioimmunoassay	Suzme et al. 2007
PIIINP: amino-terminal propeptide of procollagen III	PE	Human	31	31	Suburethral tissue, venous blood samples	Serum-PIIINP SUI matched 3.1 (2.0-5.0), control 2.7 (0.6 -5.7) NS, Tissue-PIIINP SUI matched 0.048 (0.012-0.305), vs. control 0.084 (0.017-0.473) p<0.05	Radioimmunoassay	Edwall et al. 2005
	PE	Human	30	30	Suburethral tissue	SUI 0.11, control 0.37, NS	Radioimmunoassay	Edwall et al.2007
PLK1	GE	Sprague-Dawley rats, 2 months old, pregnant, primiparous, received OVX	5	8	Whole urethra	Q-PCR: 2.45 and Microarray 8.06 fold increase in SUI compared to controls p<0.01	Microarray analysis, real-time PCR	Lin et al. 2009
Progesteron receptor	PE	Human	4	6	Periurethral fascia in the inferior area of the bladder neck	SUI 0.64 +/- 0.13, control 0.48 +/- 0.33 (p=0.56)	Western blot and densitometry	Bai et al. 2004
	GE and PE	Human	12 (4 pre-menopausal; 8 post-m)	11 (6 pre-m; 5 post-m)	Para-urethral	Gene and protein expression showed no significant differences between SUI group and controls	Immunohistochemistry, RT-PCR	Soderberg et al.2007
	PE	Human	28	30	Anterior vaginal wall	Progesterone receptor positive staining SUI 11 (39.3%), controls 14 (46.7%) p=0.571	Immunohistochemistry	Pantatosakis et al. 2016
Prolactin	PE	Human	138	137	Serum	Prolactin (mIU/ml) 8.34 (+/-3.45) control 8.23 (+/-2.86) p-value 0.780	Immunoassay	Augoulea et al. 2015
	PE	Human	47	47	Serum	Prolactin mean +/- SD SUI 10.36+/-4.36, control 12.68+/-11.70 ng/ml, p-value 0.35	Electrochemiluminescence immunoassay	Bodner-Adler et al. 2017
Protein s-100	PE	Human	10	10	Periurethral and perirectal pubococcygeus muscle on the right and left sides	No sifnificant differences between SUI and controls	Immunohistochemistry	Busacchi et al. 2004
Proteoglycan	PE	Human	15	16	Periurethral vaginal wall biopsy	Small proteoglycans SUI 1.86+/-0.48 ug/mg wet weight vs controls 1.96+/-0.57 (p>0.05)	Alcian blue precipitation followed by electrophoretic separation and quantification	Falconer et al. 1998a
	PE	Human	12	13	Periurethral vaginal wall biopsy	Mean concentration of small proteoglycans lower in control compared to SUI 2.24 vs. 2.98 ug/mg wet weight(not significant)	Alcian blue precipitation followed by electrophoretic separation and quantification	Falconer et al. 1998b
Pyridinium (PYD)/Cr	PE	Human	23	39	24h urine	SUI (mean+/- SEM) 110.8 +/- 19.7 nM/mM creatinine, controls 85.2 +/-13.7 nM/Mm. NS (no relationship between age and urinary PYD in either group)	ELISA	Kushner et al. 2004
Pyridinoline	PE	Human	36	25	Periurethral vagina	nmol/mg collagen SUI 0.25 (0.07-0.4), control 0.3 (0.17-0.45) p=0.0002	SDS gel electrophoresis densitometry, LKB 4400 amino acid analyser	Keane et al. 1997
	PE	Human	30	15	Pubocervical and vesicovaginalfascia	SUI 0.32+/- 0.06, control 0.35 +/- 0.08 p=0.24 mol croslinked/mol collagen	Pyrilinks kit	Rechberger et al. 1998
	PE	Human	7	15	Anterior vaginal wall	There was no difference in the level of pyridinoline cross-links between the incontinent and continent groups.	Pyrilinks kit	Chen et al. 2002
RGS2	GE	Sprague-Dawley rats, 2 months old, pregnant, primiparous, received OVX	8	5	Whole urethra	Q-PCR: 2.29, and Microarray 3.12 fold increase in SUI compared to control group p<0.01	Microarray analysis, real-time PCR	Lin et al. 2009
SERPINA5	PE	Human	20	20	Urine (and blood to verify)	Higher protein expression in SUI group compared to controls	Highperformance liquid chromatography separation and tandem mass spectrometry detection	Koch et al. 2016
	GV	Human	19	19	Serum	rs885786 (homozygous and heterozygous) SNP of SERPINA5 identified in 15 SUI and 10 controls (p = 0.09), rs6113 SNP of SERPINA5 present in 4 controls compared with no SUI (p =0.105), Other known SNPs of SERPINA5(rs10130906, rs2069963, rs2069962, rs2069961, rs2069959)no trends in difference between groups. Combination of rs885786 SNP of SERPINA5 and rs179970 SNP of MMP1 detected in 10 SUI and 5 con…	Sanger sequencing	Reischer et al. 2020
SHBG	PE	Human	138	137	Serum	SHBG SUI 65.59 (+/-27.41) control 74.17 (+/-31.83) p-value 0.008	Electrochemiluminescence immunoassay	Augoulea et al. 2015
	PE	Human	47	47	Serum	SHBG mean +/- SD SUI 59.24+/-28.92, control 58.91+/-25.15nmol/l, p-value 0.68	Electrochemiluminescence immunoassay	Bodner-Adler et al. 2017
SIRT7	PE	Sprague Dawley rats, 8weeks, SUI group underwent OVX	5	5	Urethra and bladder	Higher protein expression in SUI group compared to controls	Western blot	Zhang et al. 2020a
SMAD2/3 en (p)SMAD2/3	PE	Sprague Dawley rats, 8weeks, SUI group underwent OVX	5	5	Urethra and bladder	Higher protein expression of Smad2/3 and p-SMAD 2/3 in SUI group compared to controls	Western blot	Zhang et al. 2020a
	GE and PE	Sprague-Dawley rats, 2 months old, pregnant, primiparous, received OVX	10	14	Whole urethra	SMAD2 Q-PCR 1.89, microarray 2.50 fold increase in SUI compared to control group, p<0.01, protein expressio: increased protein expression in SUI group compared to controls p<0.001	Microarray analysis, real-time PCR, Western blot analysis, and immunohistochemical evaluation	Lin et al. 2009
	PE	Sprague-Dawley rats, pregnant, 8weeks old, primiparous, SUI group underwent OVX	14	14	Urethrovaginal tissue	The ratio of p-Smad2 to total Smad2 was significantly higher in SUI group compared with sham group	Western blot	Li et al. 2012b
	PE	Sprague-Dawley rats, female, 8 weeks old	10	10x2	Anterior vaginal wall	Smad3 positive: SUI 0, control 3 (3%), blank 8 (80%) (SUI vs. blank p=0.000), SUI vs. control p=0.053	Immunohistochemistry and western blot	Wang et al. 2015
	GE and PE	C57BL/6 mice, 8 weeks	15	15	Anterior vaginal wall	Gene expression no significant differences in Smad2 and Smad 3, Protein expression no significant differences in Smad2 and Smad 3, however significant decrease in p-Smad2 and p-Smad2 in SUI group compared to controls p<0.05	Western blot, RT-PCR	Min et al. 2017
	PE	WT (Nfe2l2+/+) female C57BL/6 mice and Nfe2l2−/− mice, 8-10 weeks, virgin	30 (3x10)	30 (3x10)	Anterior vaginal wall	Protein levels of p-Smad3 in anterior vaginal walls of mice in the WT-VD group were significantly lower than those in the WT-NC, WT-Sham, KO-NC, and KO-Sham groups, but significantly higher than those in the KO-VD group	Western blot	Tang et al. 2017a
	PE	C57BL/6 mice, WT, 8-10 weeks, virgin	15	15	Urethras and anterior vaginal walls	No significance changes in Smad2, p-Smad2, and Smad3. Significantly decreased protein expression of p-Smad2 in SUI group compared to controls, p<0.05	Western blot	Tang et al. 2017b
SMAD7	PE	Sprague-Dawley rats, female, 8 weeks old	10	10x2	Anterior vaginal wall	Smad 7 positive: SUI 10 (100%), control 5 (55.6%), blank 1 (10%) (SUI vs. blank p=0.000, SUI vs. control p=0.021)	Immunohistochemistry and western blot	Wang et al. 2015
SOD3	PE	C57BL/6 strain female mice, 6-8 weeks, virgin	4	4	Urethra	No significant changes in protein expression levels in VD group compared to controls	Western blot	Chen et al. 2014b
SOD (total) (total superoxide dismutase)	PE	Sprague-Dawley rats, 2 months old, 280-330 g, primiparous, at gestational day 16, SUI group underwent OVX	6	6	Bladder-urethra complex	The activities of total SOD were remarkably elevated in SUI rats compared to controls (93.48 ± 11.40 versus 113.90 ± 9.19)	SOD assay kit	Wan et al. 2017
	GV and PE	WT C57BL/6J and Nfe2l2-/- female mice, 8-10 weeks, virgins	15 (x4)	15 (x4)	Anterior vaginal wall	The activities of T-SOD in the WT-VD7d group were significantly lower than those in the WT-NC, WT-Sham, KO-NC, and KO-Sham groups, but they were significantly higher than those in the KO-VD7d group. The activities of T-SOD in the WT-VD14d group were significantly higher than those in the KO-VD14d group.	T-SOD specific measurement kit	Tang et al. 2019
STAT3	GE and PE	Human	10	10	Periurethral vaginal wall	Significantly higher gene (p<0.05) and protein (p<0.05) expression in SUI, compared with control subjects	RT-PCR, western blot, densitometry	Liu et al. 2014
Survival motor neuron (SMN) protein	PE	C57BL/6 strain female mice, 6-8 weeks, virgin	4	4	Urethra	No significant changes in protein expression levels in VD group compared to controls	Western blot	Chen et al. 2014b
Substance P	PE	Human	10	10	Periurethral and perirectal pubococcygeus muscle on the right and left sides	SUI +--, control +++ (both muscles)	Immunohistochemistry	Busacchi et al. 2004
TbR-2	PE	Sprague-Dawley rats, female, 8 weeks old	10	10x2	Anterior vaginal wall	TBR-2 positive SUI 10 (100%), control 8 (88.9%), blank 4 (40%), (SUI vs. blank p=0.004, SUI vs. control p=0.292)	Immunohistochemistry and western blot	Wang et al. 2015
Testosterone	PE	Human	57	30	Serum	SUI 9 (1-36), control 13 (1-29) pmol/L, NS	Radioimmunoassay	Edwall et al.2007
	PE	Human	138	137	Serum	Testosterone (ng/dl)SUI 0.378 (+/-0.17) control 0.388 (+/-0.185) p-value 0.643	Immunoassay	Augoulea et al. 2015
	PE	Human	47	47	Serum	Testosterone mean +/-SD SUI 0.13+/-0.09, control 0.241+/-0.154 ng/ml, p-value 0.052	Electrochemiluminescence immunoassay	Bodner-Adler et al. 2017
Tyrosine hydroxilase (TH)	PE	Sprague Dawley rats, 8weeks, SUI group underwent OVX	8	8	Urethra and vagina	Significant increase in protein expression in SUI group compared to controls	Immunofluorescence	Zhang et al. 2020b
	PE	Sprague Dawley female rats, 8 weeks, weight 230-306 g	20 (not clear)	4	Urethra	Area of positive staining SUI mean 1.0% +/- 0.5%, control 2.5% +/- 0.5%. The reduction of the positive stained area returned to normal levels 14 days after VD (mean 2.3% +/- 1.5%).	Immunohistochemistry	Sumino et al. 2016
Total hexosaminidase (T-Hx)	PE	Human	14	12	Uterosacral ligaments	Hexosaminidases SUI+POP 25,7+/-12.3nmol/mg tissue protein vs. Control 46.1+/-20.8 p<0.05	Spectophotometry	Suzme et al. 2007
TIMP-1	GE	Human	7	15	Anterior vaginal wall	34% decrease in quantitative TIMP-1 mRNA in SUI vs control (p=0.03). MMP-1/TIMP-1 ratio was significantly higher comprared to controls (p=0.04).	QC-RT-PCR	Chen et al. 2002
	PE	Human	4	3	Periurethral vaginal wall	Periurethral vaginal tissues from incontinent women expressed less TIMP-1 when compared with tissue from age-matched control subjects. The TIMP-1 protein amount in SUI tissue was no more than one third of that found in tissues from continent women (range, 8%-33%).	Western blot	Chen et al. 2003a
	GE and PE	Human	5	5	Anterior vaginal wall	mRNA expressions TIMP-1 significantly decreased in the SUI group compared to the control group, P < 0.01. Protein expression: TIMP-1 decreased in the SUI group compared with the control group, P < 0.01	Immunohistochemistry, Q-RT-PCR, ELISA	Wang et al. 2019
	GE	Sprague-Dawley rats, female, weighing 252–330g, adult	36	18	Urethra	No significant changes in mRNA levels of TIMP-1 were observed in VD groups compared with controls.	RT-PCR	Yoshikawa et al. 2017
TIMP-2	GE	Human	7	15	Anterior vaginal wall	NS difference in TIMP-2 mRNA expression between SUI and control	QC-RT-PCR	Chen et al. 2002
	GE	Sprague-Dawley rats, female, weighing 252–330g, adult	36	18	Urethra	No significant changes in mRNA levels of TIMP-2 were observed in VD groups compared with controls.	RT-PCR	Yoshikawa et al. 2017
TIMP-3	GE	Human	7	15	Anterior vaginal wall	NS difference in TIMP-3 mRNA expression between SUI and control	QC-RT-PCR	Chen et al. 2002
	PE	Human	40	40	Anterior vaginal wall	TIMP-3 positive rate SUI 27.5% vs. Control 47.5%, p<0.05	Immunohistochemistry	Fan et al. 2017
TNF-a	GE	Sprague-Dawley rats, female, weighing 252–330g, adult	36	18	Urethra	No significant changes in mRNA levels of TNF-a were observed in VD groups compared with controls.	RT-PCR	Yoshikawa et al. 2017
	PE	Sprague Dawley rats, aged 12.8+/-1.2 weeks old	7	7	Urethra	TNF-a SUI 79.5 +/- 7.0, control 37.2 +/- 6.1 vs. (p=0.003)	Immunohistochemistry and western blot	Lo et al. 2020
TNFR1	GE	Sprague-Dawley rats, female, weighing 252–330g, adult	36	18	Urethra	mRNA levels of Tnfr1 significantly increased in the urethra only in the VD-3 (times) group compared with the sham group.	RT-PCR	Yoshikawa et al. 2017
TNFR2	GE	Sprague-Dawley rats, female, weighing 252–330g, adult	36	18	Urethra	No significant changes in mRNA levels of Tnfr2 were observed in VD groups compared with controls.	RT-PCR	Yoshikawa et al. 2017
Transforming growth factor (TGF-b1)	GE and PE	Human	19 (11 prol., 8 secr. phase)	17 (9 prol.; 8 secr. phase)	Periurethral vaginal wall	mRNA expression (11–fold increase) higher in control group in proliferative phase and lower in control group in secretory phase, 8-fold decrease for TGF-β1 (NS). Protein expression by Western blot analysis and ELISA no differences between control and SUI in either phase	RT-PCR, ELISA, western blot	Wen et al. 2006
	PE	Human	14	12	Serum	TGF-B1 SUIPOP 85+/-27.8 vs. control 107+/-39.01 ng/ml NS	ELISA	Suzme et al. 2007
	GE and PE	Human	18	8	Primary cell cultures of periurethral vaginal wall	mRNA expression: TGF-B1 SUI stage 2 and 3 decreased vs. control p< 0.001, Protein expression TGF-B1 stage 2 SUI p<0.01, stage 3 SUI p<0.001 decreased vs. Control.	Immunofluorescence staining, western blot, RT-q-PCR	Li et al. 2019a
	PE	Sprague-Dawley rats, pregnant, 8weeks old, primiparous, SUI group underwent OVX	14	14	Urethrovaginal tissue	Increased protein expression in SUI group compared to controls	Immunohistochemistry and western blot	Li et al. 2012b
	GE and PE	C57BL/6 mice, 8 weeks	15	15	Anterior vaginal wall	Compared with the CON, the protein and mRNA expression of TGF-β1 significantly decreased in the VD group (P = .0000 and P = .0263, respectively)	Western blot, RT-PCR	Min et al. 2017
	PE	WT (Nfe2l2+/+) female C57BL/6 mice and Nfe2l2−/− mice, 8-10 weeks, virgin	30 (3x10)	30 (3x10)	Anterior vaginal wall	Protein levels of TGFβ1 in the WT-VD group were significantly lower than those in the WT-NC, WT-Sham, KO-NC, and KO-Sham groups, but significantly higher than those in the KO-VD group	Western blot	Tang et al. 2017a
	PE	C57BL/6 mice, WT, 8-10 weeks, virgin	15	15	Urethras and anterior vaginal walls	Expression levels of TGF-β1 were significantly decreased after VD compared with the NC group	Western blot	Tang et al. 2017b
	GE	Sprague-Dawley rats, female, weighing 252–330g, adult	36	18	Urethra	mRNA levels of Tgfb1 were significantly increased in the urethra of both VD-1 (time) and VD-3 (time) groups compared with the sham group although there was no statistical difference in the expression of these transcripts between VD-1 and VD-3 groups.	RT-PCR	Yoshikawa et al. 2017
	PE	Sprague Dawley rats, 8weeks, SUI group underwent OVX	5	5	Urethra and bladder	Higher protein expression in SUI group compared to controls	Western blot	Zhang et al. 2020a
Triglycerides	PE	Human	138	137	serum	Triglycerides SUI 96.62 control 96.23(+/-38.46) p-value 0.937	Autoanalyzer	Augoulea et al. 2015
UMOD	PE	Human	20	20	Urine (and blood to verify)	Lower expression in SUI samples compared with controls: uromodulin (logFC −4.87)	Highperformance liquid chromatography separation and tandem mass spectrometry detection	Koch et al. 2016
	GV	Human	19	19	Serum	So significant trends in association of the rs34857077 SNP of the UMOD gene.	Sanger sequencing	Reischer et al. 2020
VAchT	PE	Sprague Dawley female rats, 8 weeks, weight 230-306 g	20 (not clear)	4	Urethra	SUI group had lower positive staining 7days after VD compared to controls, after 14 days no significant differences	Immunohistochemistry	Sumino et al. 2016
Vasoactive intestinal polypeptide (VIP)	PE	Human	10	10	Periurethral and perirectal pubococcygeus muscle on right and left sides	SUI +--, control ++- (both muscles)	Immunohistochemistry	Busacchi et al. 2004
	PE	Human	17 (8 pre-m; 9 post-m)	20 (10 pre-m; 10 post-m)	Upper anterior vaginal wall at the bladder neck level	IHC: Staining density significantly lower staining density in pre and postmenipausal SUI pts versus controls (p<0.05). Radioimmunoassay ir-VIP premenopausal SUI 208.34+/- 11.07pg/mg protein vs. control 309.49 +/- 109.04 p<0.05, postmenopausal SUI 203.41+/- 39.93 vs. control 291.49+/- 48.46 p<0.05	Immunohistochemistry and radioimmunoassay	Hong et al. 2008
	PE	Human	13	13	anterior and posterior vaginal walls near the fornix	There were no significant differences in the expression of VIP in the anterior and posterior vaginal epithelium walls in a comparison among SUI+POP vs. Control. Anterior wall p=0.575, posterior wall p=0.086	Immunohistochemistry	Zhu et al. 2009
	PE	Human	18	9	Midline anterior vaginal cuff	POP + SUI N=18 staining density -: 12, +:6, ++/+++:0, controls (n=9) -/+:0 ++:2, +++:7 p<0.05 of all POP stages+SUI vs. Control. Semi-quantitative analysis showed that the level of VIP protein in vaginal tissue was 71%+/- 6.9% in POP II + SUI, 23% +/- 6.9% in POP III + SUI, 11% +/- 3.5% in POP IV + SUI compared to controls 100% p<0.05	immunohistochemistry and Western blot	Hu et al. 2013
	PE	Human	28	30	Anterior vaginal wall	VIP positive staining SUI 2 (7.1%), control 11 (36.7%) p=0.007	Immunohistochemistry	Pantatosakis et al. 2016
	PE	Human	40	40	Anterior vaginal wall	Positive staining SUI 22.5% vs. Control 45.0% p<0.05	Immunohistochemistry	Fan et al. 2017
VEGF	PE	Sprague-Dawley rats, pregnant, 8weeks old, primiparous, SUI group underwent OVX	20	20	Urethra	SUI significantly lower VEGF/b-actin ratio compared to sham	Immunohistochemisrty and western blot	Li et al. 2012a
	GE	Lewis rats, 9 weeks, virgins, primiparous	18	18	Urethra	VEGF showed immediate up-regulation after VD and/or parturition. VEGF was up-regulated 2.9-fold in virgin rats immediately after VD but not in postpartum rats after VD (p=0.001). Again, by 3 days these levels had normalized.	RT-PCR	Lenis et al. 2013
	GE	Wistar rats, female, +/- 120days old, weighing 250g	17	17	Urethra	Vegf gene expression was not different between SUI and control	Real-time RT-qPCR	Bilhar et al. 2018
	GE and PE	Sprague-Dawley rats, female, 12 weeks, SUI group underwent OVX	9	10	Urethra	No significant difference in VEGF expression between VD rats vs controls.	Immunohistochemistry, RT-PCR	Wu et al. 2018
Versican	GE and PE	Human	6	6	Periurethral vaginal wall	No significant difference between SUI group and controls	Northern blot	Falconer et al. 1998a
	GE	Human	6	6	Periurethral vaginal wall	No significant difference between SUI group and controls	Northern blot	Falconer et al. 1998b
vWF	PE	Sprague-Dawley rats, 10w old, mature, weight 250-300g, virgins	18	6	Urethra	No difference was seen in vWF expression among the normal, pudendal denervation, and vaginal distension groups. However, vWF expression in the electrocauterization group was significantly decreased compared with that in the other groups.	Immunohistochemistry	Hong et al. 2013
	PE	Rats, 12 weeks, weighing 250/300g	8	8	Bladder and urethra	Significantly lower vWf expression in SUI group compared to controls p<0.001.	Immunohistochemistry	Zordani et al. 2019
Abbreviations: GE gene expression, GV genetic variant, KO knockout, LPP leak point pressure, NC normal control, NS not significant, OVX, ovariectomy, PCR polymerase chain reaction, PE protein expression, POP pelvic organ prolapse, Post-m postmenopausal, pre-m premenopausal, prol. proliferative, secr. secretory, SUI stress urinary incontinence, VD vaginal distension, WT wildtype
*Serum or urinary biomarkers were grouped as protein expression

## Sheet: Supplementary table 4 Robins-I
ROBINS-I First author year of publication	Confounding domain Age			Confounding domain BMI			Conf. dom. menopausal status			Confounding domain mode of delivery			Confounding domain parity			Additional confounding domain			Bias due to confounding										Bias in selection of participants into the study										Bias in classification of interventions								Bias due to deviations from intended interventions
	Measured valididly and reliably?	Explain	failure to adjust favours?	Measured valididly and reliably?	Explain	failure to adjust favours?	Measured valididly and reliably?	Explain	failure to adjust favours?	Measured valididly and reliably?	Explain	failure to adjust favours?	Measured valididly and reliably?	Explain	failure to adjust favours?	Measured valididly and reliably?	Explain	failure to adjust favours?	1.1 Bias due to confounding	Explain	1.4	Explain	1.5	explain	1.6	explain	Risk of bias judgement	Optional	2.1	Explain	2.2	explain	2.4	explain	2.5	explain	Risk of bias judgement	optional	3.1	explain	3.2	explain	3.3	explain	risk of bias judgement	optional	4.1	explain	4.2
Ulmsten et al. 1987	Y	they mention age in both groups: Controls (group A): mean 43 (34-56), SUI (group B): mean 47 (39-55)	NA	NI	not mentioned	NI	NI	NA	no information	NI	not mentioned	NI	Y	most likely well meassyred	the control group has slightly lower parity	NA	NA	NA	N	LPP meassured	Y	they included very few participants, they specify "during subsequent operation another biopsy of similar size was also taken from ligament". This means that samples were taken from the same patient.	NA	NA	PN	crossectional design	Medium low	away from null	PY	Niet alle geincludeerde patienten zijn bij beide essays geincludeerd, geen reden waarom niet	NI	NA	PY	>5yrs complaints	NA	NA	Serious	unknown	Y	Peak point pressures were meassured in all participants	Y	NA	N	not possible	Low	towards null	PN	crosssectional not sure if age matched	NA
Rechberger et al. 1993	Y	meassured and no significant difference	NA	NI	not mentioned	NI	Y	5/11 vs 2/5 were premenopausal in both groups	NA	NI	not mentioned	NI	NI	not mentioned	NI	Degree of POP	not mentioned differences between the groups	NI	PY	grade of POP not mentioned, cystoscopy was performed.	PY	age and menopausal status were mentioned and NS, however parity, BMI and MOD, not mentioned	PY	most likely	PN	crossectional design	Medium Low	away from null	N	Selection based on SUI	NA	NA	PN	Not stated for how long patients had SUI	NI	Not mentioned	Moderate	away from null	PN	grade of POP and duration of SUI, and diagnosis not specified	Y	NA	N	not possible	Moderate	away from null	N	crosssectional and age matched	NA
Bergman et al. 1994	PY	mentioned that controls were 4 years younger than SUI=POP group, however no relationshop was found between collagen type 3 content and age of menopausal status of pts	possible affecting outcome	NI	not mentioned	NI	Y	precise parity and menopausal status not mentioned however: were comparable as per parity and menopausal status	NA	NI	not mentioned	NI	Y	precise parity and menopausal status not mentioned however: were comparable as per parity and menopausal status	NA	Severity of SUI mentioned (interfered with their daily activity), UDO confirmed	NA	NA	N	LPP meassured	Y	age, menopausal status, and parity were mentioned. The latter two were NS between groups, age was however no age-related changed were found. BMI and MOD were not mentioned	PY	most likely	PN	crossectional design	Low risk of bias	towards null	N	Selection based on SUI	NA	NA	PN	Not stated for how long patients had SUI	NI	Not mentioned	Moderate	away from null	Y	SUI was UDO confirmed, severity was mentioned	Y	NA	N	not possible	Low	towards null	N	crosssectional and no age related changes	NA
Falconer et al. 1994	Y	numbers mentioned and not significantly different	NA	NI	not mentioned	NI	Y	all subjects were postmenopausal for at least two years and no HRT	NA	NI	not mentioned	NI	Y	numbers mentioned and not significantly differend	NA	Severity not mentioned, however diagnosed by urodynamic investigation.	NA	NI	N	UDO performed, severity of SUI not mentioned	Y	age, menopausal status and parity were not different among groups	PY	most likely	PN	crossectional design	Low risk of bias	towards null	N	Selection based on SUI	NA	NA	PN	Not stated for how long patients had SUI	NI	Not mentioned	Moderate	away from null	Y	SUI was UDO confirmed, severity not mentioned	Y	NA	N	not possible	Low	towards null	N	crosssectional and no age related changes	NA
Keane et al. 1997	Y	numbers mentioned and not significantly different	NA	Y	numbers mentioned and not significantly different	NA	Y	all premenopausal	NA	NA	all nulliparae	NA	Y	all nulliparae	NA	Severity mentioned, UDO proven	NA	NA	N	UDO performed and severity mentioned	Y	for ALL the confounding factors	PY	most likely	PN	crossectional design	Low risk of bias	towards null	N	Selection based on SUI	NA	NA	PN	Not stated for how long patients had SUI	NI	Not mentioned	Moderate	away from null	Y	SUI was UDO confirmed, severity was mentioned	Y	NA	N	not possible	Low	towards null	N	crosssectional and age matched	NA
Falconer et al. 1998	Y	numbers mentioned and not significantly different	NA	PY	all<30	NI	Y	all premenopausal	NA	NI	not mentioned	NI	Y	comparable	NA	UDO proven, at least 3 years	NA	NA	N	UDO performed and severity mentioned	Y	age, menopausal status and parity were not different among groups	PY	most likely	PN	crossectional design	Low risk of bias	towards null	N	Selection based on SUI	NA	NA	PY	>3y of complaints	NA	NA	Low	towards null	Y	SUI was UDO confirmed, severity was mentioned	Y	NA	N	not possible	Low	towards null	N	crosssectional and age matched	NA
Falconer et al. 1998b	Y	numbers mentioned and not significantly different	NA	NI	not mentioned	NI	Y	all subjects were postmenopausal	NA	NI	not mentioned	NI	Y	comparable	NA	SUI >3years (medical history, gyn exam, pad test and UDO)	NA	NA	N	UDO performed and severity mentioned	Y	age, menopausal status and parity were not different among groups	PY	most likely	PN	crossectional design	Low risk of bias	towards null	N	Selection based on SUI	NA	NA	PY	>3y of complaints	NA	NA	Low	towards null	Y	SUI was UDO confirmed, severity was mentioned	Y	NA	N	not possible	Low	towards null	N	crosssectional and age matched	NA
Rechberger et al. 1998	Y	numbers mentioned and not significantly different	NA	N	significantly different, SUI higher BMI	NI	Y	"No distinction was made between premenopause and postmenopause, but age match suggests that this factor was the same in both groups. There were no differences in estradiol status."	NA	NI	not mentioned	NI	Y	comparable	NA	Severity not mentioned, however diagnosed by urodynamic investigation.	NA	NA	N	UDO performed, severity of SUI not mentioned	PY	age and parity not significantly different, however BMI was significantly higher in SUI group	PY	most likely	PN	crossectional design	Medium Low	away from null	N	Selection based on SUI	NA	NA	PN	Not stated for how long patients had SUI	NI	Not mentioned	Moderate	away from null	Y	SUI was UDO confirmed, severity not mentioned	Y	NA	N	not possible	Low	towards null	N	crosssectional and age matched	NA
Liapis et al. 2000	Y	numbers mentioned and not significantly different	NA	N	significantly different, SUI higher BMI	NI	NI	NA	no information	NI	not mentioned	NI	Y	comparable	NA	Severity not mentioned, however diagnosed by urodynamic investigation.	NA	NA	N	UDO performed, severity of SUI not mentioned	PY	age and parity not significantly different, however BMI was significantly higher in SUI group	PY	most likely	PN	crossectional design	Medium Low	away from null	N	Selection based on SUI	NA	NA	PN	Not stated for how long patients had SUI	NI	Not mentioned	Moderate	away from null	Y	SUI was UDO confirmed, severity not mentioned	Y	NA	N	not possible	Low	towards null	N	crosssectional and age matched	NA
Liapis et al. 2001	Y	numbers mentioned and not significantly different	NA	Y	not significantly different	NA	PY	SUI + POP 16/34 premenopausal, POP 17/32 premenopausal, control 10/28 premenopausal, significance unknown	NI	NI	not mentioned	NI	Y	comparable	NA	Severity not mentioned, however diagnosed by urodynamic investigation.	NA	NA	N	UDO performed, severity of SUI not mentioned	Y	age, parity and BMI not significantly different, menopausal status maybe is	PY	most likely	PN	crossectional design	Low risk of bias	towards null	N	Selection based on SUI	NA	NA	PN	Not stated for how long patients had SUI	NI	Not mentioned	Moderate	away from null	Y	SUI was UDO confirmed, severity not mentioned	Y	NA	N	not possible	Low	towards null	N	crosssectional and age matched	NA
Chen et al. 2002	PY	age-related changes however also look at age related changes	NA	NI	not mentioned	NI	PY	when menopausal status matched, same consistent pattern	NA	NI	not mentioned	NI	Y	comparable	NA	UDO proven, severity of POP mentioned	NA	NA	N	UDO performed, severity of SUI not mentioned	PY	age and menopausal status were different, parity was not, however they checked for age and menopausal status related differences. BMI not mentioned	PY	most likely	PN	crossectional design	Medium Low	away from null	N	Selection based on SUI	NA	NA	PN	Not stated for how long patients had SUI	NI	Not mentioned	Moderate	away from null	Y	SUI was UDO confirmed, severity not mentioned	Y	NA	N	not possible	Low	towards null	N	crosssectional and no age related changes	NA
Chen et al. 2003a	PY	age-related changes however also look at age related changes	NA	Y	not significantly different	NA	Y	all premenopausal	NA	NI	not mentioned	NI	PY	not clear if there is a difference	NI	Severity not mentioned, however diagnosed by urodynamic investigation.	NA	NA	N	UDO performed, severity of SUI not mentioned	PY	age and BMI not different, however parity was	PY	most likely	PN	crossectional design	Medium Low	away from null	N	Selection based on SUI	NA	NA	PN	Not stated for how long patients had SUI	NI	Not mentioned	Moderate	away from null	Y	SUI was UDO confirmed, severity not mentioned	Y	NA	N	not possible	Low	towards null	N	crosssectional and no age related changes	NA
Chen et al. 2003b	Y	numbers mentioned and not significantly different	NA	Y	not significantly different	NA	Y	all premenopausal	NA	NI	not mentioned	NI	Y	comparable	NA	UDO proven, severity of POP mentioned	NA	NA	N	UDO performed, severity of SUI not mentioned, however need of surgery	Y	age, menopausal status, BMI and parity were not different among groups	PY	most likely	PN	crossectional design	Low risk of bias	towards null	N	Selection based on SUI	NA	NA	PN	Not stated for how long patients had SUI	NI	Not mentioned	Moderate	away from null	Y	SUI was UDO confirmed, severity not mentioned	Y	NA	N	not possible	Low	towards null	N	crosssectional and no age related changes	NA
Cor et al. 2003	Y	numbers mentioned and not significantly different	NA	NI	not mentioned	NI	NI	not mentioned	NI	NI	not mentioned	NI	Y	comparable	NA	Severity not mentioned, however diagnosed by urodynamic investigation.	NA	NA	N	UDO performed, severity of SUI not mentioned, however need of surgery	PY	age and parity NS different, rest not mentioned	PY	most likely	PN	crossectional design	Medium Low	away from null	N	Selection based on SUI	NA	NA	PN	Not stated for how long patients had SUI	NI	Not mentioned	Moderate	away from null	Y	SUI was UDO confirmed, severity not mentioned	Y	NA	N	not possible	Low	towards null	N	crosssectional and no age related changes	NA
Lang et al. 2003	Y	numbers mentioned and not significantly different	NA	Y	not significantly different	NA	Y	all postmenopausal in SUI group. The other two groups had premenopausal women as well	NA	NI	not mentioned	NI	Y	comparable	NA	Severity was mentioned, UDO+,	NA	NA	N	UDO performed and severity mentioned	Y	age, menopausal status, BMI and parity were not different among groups	PY	most likely	PN	crossectional design	Low risk of bias	towards null	N	Selection based on SUI	NA	NA	PN	Not stated for how long patients had SUI	NI	Not mentioned	Moderate	away from null	Y	SUI was UDO confirmed, severity was mentioned	Y	NA	N	not possible	Low	towards null	N	crosssectional and age matched	NA
Bai et al. 2004	Y	numbers mentioned and not significantly different	NA	Y	not significantly different	NA	Y	all postmenopausal	NA	Y	comparable	NI	Y	comparable	NA	Severity not mentioned, however diagnosed by urodynamic investigation.	NA	NA	N	UDO performed, severity of SUI not mentioned, however need of surgery	Y	age, menopausal status, BMI and parity were not different among groups	PY	most likely	PN	crossectional design	Low risk of bias	towards null	N	Selection based on SUI	NA	NA	PN	Not stated for how long patients had SUI	NI	Not mentioned	Moderate	away from null	Y	SUI was UDO confirmed, severity not mentioned	Y	NA	N	not possible	Low	towards null	N	crosssectional and age matched	NA
Bakas et al. 2004	Y	numbers mentioned and not significantly different	NA	Y	not significantly different	NA	Y	all premenopausal	NA	NI	not mentioned	NI	Y	comparable	NA	Severity not mentioned, however diagnosed by urodynamic investigation.	NA	NA	N	UDO performed, severity of SUI not mentioned, however need of surgery	Y	age, menopausal status, BMI and parity were not different among groups	PY	most likely	PN	crossectional design	Low risk of bias	towards null	N	Selection based on SUI	NA	NA	PN	Not stated for how long patients had SUI	NI	Not mentioned	Moderate	away from null	Y	SUI was UDO confirmed, severity not mentioned	Y	NA	N	not possible	Low	towards null	N	crosssectional and age matched	NA
Busacchi et al. 2004	PN	numbers for SUI+ POP not given, only POP total, this was NS compared to control	NI	PN	numbers for SUI+ POP not given, only POP total, this was NS compared to control	NI	Y	all postmenopausal	NA	NI	not mentioned	NI	PN	numbers for SUI+ POP not given, only POP total, this was NS compared to control	NI	positive: looked at birth weights, severity not mentioned, UDO confirmed	NA	NA	N	UDO performed, severity of SUI not mentioned, however need of surgery	PN	no subgroup details of SUI group were given	PY	most likely	PN	crossectional design	Medium high risk of bias	away from null	N	Selection based on SUI	NA	NA	PN	Not stated for how long patients had SUI	NI	Not mentioned	Moderate	away from null	Y	SUI was UDO confirmed, severity not mentioned	Y	NA	N	not possible	Low	towards null	PN	crosssectional not sure if age matched	NA
Chen et al. 2004	Y	numbers mentioned and not significantly different	NA	Y	not significantly different	NA	Y	all premenopausal	NA	NI	not mentioned	NI	N	significantly higher parity in SUI/POP patients	control?	Severity not mentioned, however diagnosed by urodynamic investigation.	NA	NA	N	UDO performed, severity of SUI not mentioned, however need of surgery	PN	age and BMI NS different, parity was	PY	most likely	PN	crossectional design	Medium high risk of bias	away from null	N	Selection based on SUI	NA	NA	PN	Not stated for how long patients had SUI	NI	Not mentioned	Moderate	away from null	Y	SUI was UDO confirmed, severity not mentioned	Y	NA	N	not possible	Low	towards null	N	crosssectional and age matched	NA
Chen et al. 2004b	PY	age is mentioned, however not clear if significantly different	NA	NI	not mentioned	NI	Y	all postmenopausal	NA	NI	not mentioned	NI	NI	not mentioned	NI	Severity not mentioned, however diagnosed by urodynamic investigation.	NA	NA	N	UDO performed, severity of SUI not mentioned, however need of surgery	PN	age unclear if significantly different, rest not mentioned (all postmenopausal)	PY	most likely	PN	crossectional design	Medium high risk of bias	away from null	N	Selection based on SUI	NA	NA	PN	Not stated for how long patients had SUI	NI	Not mentioned	Moderate	away from null	Y	SUI was UDO confirmed, severity not mentioned	Y	NA	N	not possible	Low	towards null	PN	crosssectional not sure if age matched	NA
Kushner et al. 2004	PY	not age matched however looked at age related changes)	NA	NI	not mentioned	NI	NI	not mentioned	NI	NI	not mentioned	NI	NI	not mentioned	NI	Severity not mentioned, however diagnosed by urodynamic investigation.	NA	NA	N	UDO performed, severity of SUI not mentioned	PN	not age matched (no age-related changes), rest of confounding factors NI	PY	most likely	PN	crossectional design	Medium high risk of bias	away from null	N	Selection based on SUI	NA	NA	PN	Not stated for how long patients had SUI	NI	Not mentioned	Moderate	away from null	Y	SUI was UDO confirmed, severity not mentioned	Y	NA	N	not possible	Low	towards null	PN	crossectional, howwever not age matched	NA
Zhu et al. 2004	Y	numbers mentioned and not significantly different	NA	Y	not significantly different	NA	Y	all postmenopausal	NA	NI	not mentioned	NI	Y	comparable	NA	Severity of SUI was mentioned, UDO+	NA	NA	N	UDO performed and severity mentioned	Y	age, menopausal status, BMI and parity were not different among groups	PY	most likely	PN	crossectional design	Low risk of bias	towards null	N	Selection based on SUI	NA	NA	PN	Not stated for how long patients had SUI	NI	Not mentioned	Moderate	away from null	Y	SUI was UDO confirmed, severity was mentioned	Y	NA	N	not possible	Low	towards null	N	crosssectional and age matched	NA
Edwall et al. 2005	Y	numbers mentioned and not significantly different for matched SUI and control samples	NA	Y	numbers mentioned and not significantly different for matched SUI and control samples	NA	Y	pre- and post-menopausal matched	NA	NI	not mentioned	NI	Y	comparable	NA	Severity not mentioned, however diagnosed by urodynamic investigation.	NA	NA	N	UDO performed, severity of SUI not mentioned	Y	matched groups in age, bmi, parity and menopausal status	PY	most likely	PN	crossectional design	Low risk of bias	towards null	N	Selection based on SUI	NA	NA	PN	Not stated for how long patients had SUI	NI	Not mentioned	Moderate	away from null	Y	SUI was UDO confirmed, severity was not mentioned	Y	NA	N	not possible	Low	towards null	N	crosssectional and age matched	NA
Radziszewski et al. 2005	Y	numbers mentioned and not significantly different	NA	Y	not significantly different	NA	Y	all postmenopausal	NA	NI	not mentioned	NI	Y	comparable	NA	Severity of SUI was mentioned (> grade 1), UDO+	NA	NA	N	UDO performed and severity mentioned	Y	age, menopausal status, BMI and parity were not different among groups	PY	most likely	PN	crossectional design	Low risk of bias	towards null	N	Selection based on SUI	NA	NA	PN	Not stated for how long patients had SUI	NI	Not mentioned	Moderate	away from null	Y	SUI was UDO confirmed, severity was mentioned	Y	NA	N	not possible	Low	towards null	N	crosssectional and age matched	NA
Chen et al. 2006	Y	numbers mentioned and not significantly different	NA	Y	not significantly different	NA	Y	all premenopausal	NA	NI	not mentioned	NI	Y	comparable	NA	Severity not mentioned, however diagnosed by urodynamic investigation.	NA	NA	N	UDO performed, severity of SUI not mentioned	Y	matched groups in age, bmi, parity and menopausal status	PY	most likely	PN	crossectional design	Low risk of bias	towards null	N	Selection based on SUI	NA	NA	PN	Not stated for how long patients had SUI	NI	Not mentioned	Moderate	away from null	Y	SUI was UDO confirmed, severity was not mentioned	Y	NA	N	not possible	Low	towards null	N	crosssectional and age matched	NA
Skorupski et al. 2006	Y	numbers mentioned and not significantly different	NA	Y	not significantly different	NA	Y	NS difference	NA	NI	not mentioned	NI	Y	comparable	NA	Severity not mentioned, however diagnosed by urodynamic investigation.	NA	NA	N	UDO performed, severity of SUI not mentioned	Y	matched groups in age, bmi, parity and menopausal status	PY	most likely	PN	crossectional design	Low risk of bias	towards null	N	Selection based on SUI	NA	NA	PN	Not stated for how long patients had SUI	NI	Not mentioned	Moderate	away from null	Y	SUI was UDO confirmed, severity was not mentioned	Y	NA	N	not possible	Low	towards null	N	crosssectional and age matched	NA
Wen et al. 2006	Y	numbers not shown, but not significantly different	NA	NI	not mentioned	NI	Y	all premenopausal	NA	NI	not mentioned	NI	NI	not mentioned	NI	Severity not mentioned, UDO not mentioned	NA	NA	PY	Severity not mentioned, definition and UDO not mentioned	PN	age-matched, rest unknown	PY	most likely	PN	crossectional design	Medium high risk of bias	away from null	N	Selection based on SUI and menstrual phase (proliferative or secretory)	NA	NA	PN	Not stated for how long patients had SUI	NI	Not mentioned	Moderate	away from null	PN	SUI not defined, no UDO mentioned	Y	NA	N	not possible	Moderate	away from null	N	crosssectional and age matched	NA
Chen et al. 2007	Y	numbers mentioned and not significantly different	NA	Y	not significantly different	NA	Y	all premenopausal	NA	NI	not mentioned	NI	PY	comparable for women in the proliferative phase (p-value=0.253); but significantly different for women in the secretory phase (p=0.039).	NA	Severity not mentioned, however diagnosed by urodynamic investigation. Undergoing surgery	NA	NA	N	UDO performed, severity of SUI not mentioned	PY	matched groups in age, bmi, parity and menopausal status in the proliferative phase. For samples in the secretory phase, the women with SUI had sig. Higher parity (Table 1).	PY	most likely	PN	crossectional design	Medium Low	towards null	N	Selection based on SUI	NA	NA	PN	Not stated for how long patients had SUI	NI	Not mentioned	Moderate	away from null	Y	SUI was UDO confirmed, severity was not mentioned	Y	NA	N	not possible	Low	towards null	N	crosssectional and age matched	NA
Edwall et al.2007	Y	numbers mentioned and not significantly different for the SUI matched (n=30)	NA	Y	numbers mentioned and not significantly different for the SUI matched (n=30)	NA	Y	matched for 30 samples	NA	NI	not mentioned	NI	Y	matched	NA	Severity was mentioned, UDO+,	NA	NA	N	UDO perfomed AND severity mentioned	Y	matched groups in age, bmi, parity and menopausal status	PY	most likely	PN	crossectional design	Low risk of bias	towards null	N	Selection based on SUI	NA	NA	PN	Not stated for how long patients had SUI	NI	Not mentioned	Moderate	away from null	Y	SUI was UDO confirmed and severity mentioned	Y	NA	N	not possible	Low	towards null	N	crosssectional and age matched for selected samples	NA
Soderberg et al.2007	PY	numbers mentioned, significance not mentioned, not likely to be significantly different due to low variability in the numbers	NI	NI	not mentioned	NI	Y	numbers given per category	NA	NI	not mentioned	NI	PY	numbers mentioned, significance not mentioned, not likely to be significantly different due to low numbers	NI	Severity not mentioned, UDO not mentioned	NA	NA	PY	Severity not mentioned, definition and UDO not mentioned	PN	age most likely matched, parity as well rest unknown	PY	most likely	PN	crossectional design	Medium high risk of bias	away from null	N	Selection based on SUI	NA	NA	PN	Not stated for how long patients had SUI	NI	Not mentioned	Moderate	away from null	PN	SUI not defined, no UDO mentioned	Y	NA	N	not possible	Moderate	away from null	N	crosssectional and age matched	NA
Song et al. 2007	Y	numbers mentioned and not significantly different	NA	PY	numbers mentioned and not significantly different for the Collagen assay. For Decorin mRNA values were not mentioned	NA	PY	For collagen assessment, all were premenopausal. numbers mentioned, significance not mentioned, not likely to be significantly different due to low numbers and also results with matched status mentioned	NI	NI	not mentioned	NI	Y	not significantly different	NA	Severity not mentioned, however diagnosed by urodynamic investigation. Undergoing surgery	NA	NA	N	UDO performed, severity of SUI not mentioned	PY	matched groups in age, bmi, parity and menopausal status for collagen but unknown for decorin	PY	most likely	PN	crossectional design	Medium high risk of bias	towards null	N	Selection based on SUI	NA	NA	PN	Not stated for how long patients had SUI	NI	Not mentioned	Moderate	away from null	Y	SUI was UDO confirmed, severity was not mentioned	Y	NA	N	not possible	Low	towards null	N	crosssectional and age matched	NA
Suzme et al. 2007	Y	numbers per group not mentioned, however they specify that patients were matched	NI	Y	numbers per group not mentioned, however they specify that patients were matched	NI	Y	all postmenopausal	NA	NI	not mentioned	NI	Y	numbers per group not mentioned, however they specify that patients were matched	NI	Severity not mentioned, however diagnosed by urodynamic investigation. Undergoing surgery	NA	NA	N	UDO performed, severity of SUI not mentioned	Y	matched groups in age, bmi, parity and menopausal status	PY	most likely	PN	crossectional design	Low risk of bias	towards null	N	Selection based on SUI	NA	NA	PN	Not stated for how long patients had SUI	NI	Not mentioned	Moderate	away from null	Y	SUI was UDO confirmed, severity was not mentioned	Y	NA	N	not possible	Low	towards null	N	crosssectional and age matched	NA
Trabucco et al. 2007	Y	numbers given per category and matched	NI	NI	not mentioned	NI	Y	numbers given per category and matched	NA	NI	not mentioned	NI	PY	numbers mentioned, significance not mentioned, not likely to be significantly different due to low numbers	NI	Severity not mentioned, however diagnosed by urodynamic investigation. Undergoing surgery	NA	NA	N	UDO performed, severity of SUI not mentioned	PY	menopausal status matched and most likely matched in parity and age, however significance not mentioned, no info on BMI	PY	most likely	PN	crossectional design	Medium Low	away from null	N	Selection based on SUI	NA	NA	PN	Not stated for how long patients had SUI	NI	Not mentioned	Moderate	away from null	Y	SUI was UDO confirmed, severity was not mentioned	Y	NA	N	not possible	Low	towards null	N	crosssectional and most likely age matched	NA
Wen et al. 2007	PN	range of ages per groups were given, no means, no determination of significant differences	NI	NI	not mentioned	NI	Y	all premenopausal and menstrual cycle matched	NA	NI	not mentioned	NI	NI	not mentioned	NI	Severity not mentioned, UDO not mentioned	NA	NA	PY	Severity not mentioned, definition and UDO not mentioned	PN	not enough information on age, rest not mentioned, all premenopausal	PY	most likely	PN	crossectional design	Medium high risk of bias	away from null	N	Selection based on SUI	NA	NA	PN	Not stated for how long patients had SUI	NI	Not mentioned	Moderate	away from null	PN	SUI not defined, no UDO mentioned	Y	NA	N	not possible	Moderate	away from null	PN	crosssectional not sure if age matched	NA
Xie et al. 2007	Y	numbers mentioned and not significantly different	NA	Y	numbers mentioned and not significantly different	NA	Y	numbers given per category and matched	NA	NI	not mentioned	NI	Y	numbers mentioned and not significantly different	NA	Severity not mentioned, however diagnosed by urodynamic investigation. Undergoing surgery	NA	NA	N	UDO performed, severity of SUI not mentioned	Y	matched groups in age, bmi, parity and menopausal status	PY	most likely	PN	crossectional design	Low risk of bias	towards null	N	Selection based on SUI	NA	NA	PN	Not stated for how long patients had SUI	NI	Not mentioned	Moderate	away from null	Y	SUI was UDO confirmed, severity was not mentioned	Y	NA	N	not possible	Low	towards null	N	crosssectional and age matched	NA
Hong et al. 2008	Y	numbers mentioned and not significantly different	NA	Y	not significantly different	NA	Y	numbers given per category and matched	NA	NI	not mentioned	NI	Y	not significantly different	NA	severity mentioned (moderate or severe), and UDO performed!	NA	NA	N	UDO perfomed AND severity mentioned	Y	matched groups in age, bmi, parity and menopausal status	PY	most likely	PN	crossectional design	Low risk of bias	towards null	N	Selection based on SUI	NA	NA	PN	Not stated for how long patients had SUI	NI	Not mentioned	Moderate	away from null	Y	SUI was UDO confirmed AND severity was mentioned	Y	NA	N	not possible	Low	towards null	N	crosssectional and age matched	NA
Wen et al. 2008b	Y	numbers mentioned and not significantly different	NA	NI	not mentioned	NI	Y	all premenopausal	NA	NI	not mentioned	NI	PY	numbers per group not mentioned, however not significantly different	NI	Severity not mentioned, UDO not mentioned	NA	NA	PY	Severity not mentioned, definition and UDO not mentioned	PY	matched groups in age, parity and menopausal status, rest not mentioned, all premenopausal	PY	most likely	PN	crossectional design	Medium high risk of bias	away from null	N	Selection based on SUI	NA	NA	PN	Not stated for how long patients had SUI	NI	Not mentioned	Moderate	away from null	PN	SUI not defined, no UDO mentioned	Y	NA	N	not possible	Moderate	away from null	N	crosssectional and age matched	NA
Zhu et al. 2008	Y	numbers mentioned and not significantly different	NA	Y	numbers mentioned and not significantly different	NA	Y	all postmenopausal	NA	NI	not mentioned	NI	Y	not significantly different	NA	Severity not mentioned, however diagnosed by urodynamic investigation. Undergoing surgery	NA	NA	N	UDO performed, severity of SUI not mentioned	Y	matched groups in age, bmi, parity and menopausal status	PY	most likely	PN	crossectional design	Low risk of bias	towards null	N	Selection based on SUI	NA	NA	PN	Not stated for how long patients had SUI	NI	Not mentioned	Moderate	away from null	Y	SUI was UDO confirmed, severity was not mentioned	Y	NA	N	not possible	Low	towards null	N	crosssectional and age matched	NA
Zhu et al. 2009	Y	numbers mentioned and not significantly different	NA	Y	numbers mentioned and not significantly different	NA	Y	all postmenopausal	NA	NI	not mentioned	NI	Y	not significantly different	NA	severity mentioned (moderate or severe), and UDO performed!	NA	NA	N	UDO perfomed AND severity mentioned	Y	matched groups in age, bmi, parity and menopausal status	PY	most likely	PN	crossectional design	Low risk of bias	towards null	N	Selection based on SUI	NA	NA	PN	Not stated for how long patients had SUI	NI	Not mentioned	Moderate	away from null	Y	SUI was UDO confirmed AND severity was mentioned	Y	NA	N	not possible	Low	towards null	N	crosssectional and age matched	NA
Athanasiou et al. 2010	PN	age significantly different	NA	NI	not mentioned	NI	Y	all postmenopausal	NA	NI	not mentioned	NI	Y	not significantly different	NA	Severity not mentioned, however diagnosed by urodynamic investigation. Undergoing surgery	NA	NA	N	UDO performed, severity of SUI not mentioned	PY	matched groups in parity and menopausal status, not in age and BMI was not indicated	PY	most likely	PN	crossectional design	Medium Low	towards null	N	Selection based on SUI	NA	NA	PN	Not stated for how long patients had SUI	NI	Not mentioned	Moderate	away from null	Y	SUI was UDO confirmed, severity was not mentioned	Y	NA	N	not possible	Low	towards null	PY	Not age matched, however crossectional	NA
Skorupski et al. 2010	PY	numbers per group not mentioned, however not significantly different	NI	NI	not mentioned	NI	Y	all postmenopausal	NA	NI	not mentioned	NI	NI	not mentioned	NI	Severity not mentioned, UDO not mentioned	NA	NA	PY	Severity not mentioned, and UDO not mentioned	PY	menopausal status matched and matched in age, no info on BMI and other confounding factors	PY	most likely	PN	crossectional design	Medium high risk of bias	away from null	N	Selection based on SUI	NA	NA	PN	Not stated for how long patients had SUI	NI	Not mentioned	Moderate	away from null	PY	SUI was defined, not UDO confirmed	Y	NA	N	not possible	Moderate	away from null	N	crosssectional and age matched	NA
Soderberg et al. 2010	PY	numbers mentioned, significance not mentioned, not likely to be significantly different due to low numbers	NI	NI	not mentioned	NI	Y	looked at menopausal differenced	NA	NI	not mentioned	NI	PY	numbers mentioned, significance not mentioned, not likely to be significantly different due to low numbers	NI	Severity not mentioned, UDO not mentioned	NA	NA	PY	Severity not mentioned, and UDO not mentioned	PY	menopausal status matched and matched in age and most likely parity, no info on BMI	PY	most likely	PN	crossectional design	Medium high risk of bias	away from null	N	Selection based on SUI	NA	NA	PN	Not stated for how long patients had SUI	NI	Not mentioned	Moderate	away from null	PY	SUI was defined, not UDO confirmed	Y	NA	N	not possible	Moderate	away from null	N	crosssectional and most likely age matched	NA
Tong et al. 2010	Y	numbers mentioned and not significantly different	NA	Y	numbers mentioned and not significantly different	NA	Y	all postmenopausal	NA	NI	not mentioned	NI	Y	not significantly different	NA	Severity not mentioned, however diagnosed by urodynamic investigation. Undergoing surgery	NA	NA	N	UDO performed, severity of SUI not mentioned	Y	matched groups in age, bmi, parity and menopausal status	PY	most likely	PN	crossectional design	Low risk of bias	towards null	N	Selection based on SUI	NA	NA	PN	Not stated for how long patients had SUI	NI	Not mentioned	Moderate	away from null	Y	SUI was UDO confirmed, severity was not mentioned	Y	NA	N	not possible	Low	towards null	N	crosssectional and age matched	NA
Wu et al. 2010	Y	numbers mentioned and not significantly different	NA	Y	numbers mentioned and not significantly different	NA	Y	numbers mentioned and not significantly different	NA	Y	numbers of vaginal deliveries mentioned and not significantly different	NA	Y	numbers of vaginal deliveries mentioned and not significantly different	NA	Severity not mentioned, however diagnosed by urodynamic investigation. Undergoing surgery	NA	NA	N	UDO performed, severity of SUI not mentioned	Y	matched groups in age, bmi, mode of delivery, parity and menopausal status	PY	most likely	PN	crossectional design	Low risk of bias	towards null	N	Selection based on SUI	NA	NA	PN	Not stated for how long patients had SUI	NI	Not mentioned	Moderate	away from null	Y	SUI was UDO confirmed, severity was not mentioned	Y	NA	N	not possible	Low	towards null	N	crosssectional and age matched	NA
Cornu et al. 2011	PY	they meassured age however compared SUI and UUI with controls so it it not clear if there were differences between those groups	unknown	NI	no information	unknown	Y	all postmenopausal	no information	PY	they meassured numbers of both SUI and UUI so it it not clear if there were differences between those groups	unknown	PY	they meassured numbers of both SUI and UUI so it it not clear if there were differences between those groups	unknown	severity not mentioned, diagnosed by stress test, ethnicity, all causasion	na	NA	N	Stress-test performed, severity of SUI not mentioned	PY	they checked for age, and menopausal status, however did this for the whole group (SUI +UUI)	PY	not mentioned how the data was collected	N	not mentioned, however due to no significant difference in age etc, most likely not of influence on outcome	Medium low	towards null	N	selectio based on SUI	na	na	PY	complaints for at least 3 months and age matched	NA	na	Low	towards null	Y	based on ics criteria, performed stress tests	Y	na	N	intervention based on diagnosed SUI	Low	towards null	PN	not menationed however most likely age matched	Na
Sioutis et al. 2011	PN	age significantly different	NA	PN	significantly different, SUI higher BMI	NI	Y	all postmenopausal	NA	NI	not mentioned	NI	PN	SUI significantly higher parity	NI	severity mentioned, and UDO performed!	NA	NA	N	UDO performed, severity of SUI not mentioned	PY	not matched in other confounding factors	PY	most likely	PN	crossectional design	Medium high risk of bias	away from null	N	Selection based on SUI	NA	NA	PN	Not stated for how long patients had SUI	NI	Not mentioned	Moderate	away from null	Y	SUI was UDO confirmed AND severity was mentioned	Y	NA	N	not possible	Low	towards null	PY	Not age matched, however crossectional	NA
Hu et al. 2012	PY	numbers were mentioned according to POP severity, not all POP patients per category had SUI however comparable ages	NI	PN	numbers were mentioned according to POP severity, not all POP patients per category had SUI and allthough significances not mentioned, the controlgroup had lower BMI	NI	N	controlgroup had lower postmenopausal incidence	NI	NI	not mentioned	NI	PN	control group had lower parity, howoever significances not mentioned	NI	Severity not mentioned, however diagnosed by urodynamic investigation. Undergoing surgery	NA	NA	N	UDO performed, severity of SUI not mentioned	PY	not matched in other confounding factors	PY	most likely	PN	crossectional design	Medium high risk of bias	away from null	N	Selection based on POP+SUI	NA	NA	PN	Not stated for how long patients had SUI	NI	Not mentioned	Moderate	away from null	Y	SUI was UDO confirmed, severity was not mentioned	Y	NA	N	not possible	Low	towards null	PN	not sure if age matched however crossectional	NA
Wen et al. 2012	PN	partly stated age matched controls however not clear if this is for all the assays or only one, no numbers shown	NI	NI	not mentioned	NI	Y	all premenopausal	NA	NI	not mentioned	NI	NI	not mentioned	NI	Severity not mentioned, UDO not mentioned	NA	NA	PY	Severity not mentioned, and UDO not mentioned	PY	menopausal status matched and possible matched in age, rest unknown	PY	most likely	PN	crossectional design	Medium high risk of bias	away from null	N	Selection based on SUI	NA	NA	PN	Not stated for how long patients had SUI	NI	Not mentioned	Moderate	away from null	PY	SUI was defined, not UDO confirmed	Y	NA	N	not possible	Moderate	away from null	N	crosssectional and most likely age matched	NA
Hu et al. 2013	PY	numbers were mentioned according to POP severity, not all POP patients per category had SUI however comparable ages	NI	PY	numbers were mentioned according to POP severity, not all POP patients per category had SUI however comparable	NI	N	controlgroup had lower postmenopausal incidence and this is very unclear because the table and text tell different things (all postmenopausal vs. Number of postmenopausal women per group)	NI	NI	not mentioned	NI	PN	control group had lower parity, howoever significances not mentioned	NI	Severity not mentioned, however diagnosed by urodynamic investigation. Undergoing surgery	NA	NA	N	UDO performed, severity of SUI not mentioned	PY	not matched in other confounding factors	PY	most likely	PN	crossectional design	Medium high risk of bias	away from null	N	Selection based on POP+SUI	NA	NA	PN	Not stated for how long patients had SUI	NI	Not mentioned	Moderate	away from null	Y	SUI was UDO confirmed, severity was not mentioned	Y	NA	N	not possible	Low	towards null	PN	not sure if age matched however crossectional	NA
Huang et al. 2013b	Y	numbers mentioned and not significantly different	NA	Y	numbers mentioned and not significantly different	NA	NI	not mentioned	NI	NI	not mentioned	NI	Y	numbers mentioned and not significantly different	NA	Severity not mentioned, however diagnosed by urodynamic investigation. Undergoing surgery	NA	NA	N	UDO performed, severity of SUI not mentioned	Y	matched groups in age, bmi, mode of delivery, parity	PY	most likely	PN	crossectional design	Low risk of bias	towards null	N	Selection based on SUI	NA	NA	PN	Not stated for how long patients had SUI	NI	Not mentioned	Moderate	away from null	Y	SUI was UDO confirmed, severity was not mentioned	Y	NA	N	not possible	Low	towards null	N	crosssectional and age matched	NA
Ozbek et al. 2013	Y	numbers mentioned and not significantly different	NA	Y	numbers mentioned and not significantly different	NA	Y	numbers mentioned and not significantly different	NA	Y	cesareans were excluded	NA	Y	numbers mentioned and not significantly different	NA	Severity not mentioned, however diagnosed by coughtest. Undergoing surgery	NA	NA	PN	coughtest performed, severity not mentioned	Y	matched groups in age, bmi, mode of delivery, parity and menopausal status	PY	most likely	PN	crossectional design	Low risk of bias	towards null	N	Selection based on SUI	NA	NA	PN	Not stated for how long patients had SUI	NI	Not mentioned	Moderate	away from null	Y	SUI was coughtest confirmed, severity was not mentioned	Y	NA	N	not possible	Low	towards null	N	crosssectional and age matched	NA
Han et al. 2014	Y	numbers mentioned and not significantly different	NA	Y	numbers mentioned and not significantly different	NA	NI	not mentioned	NI	NI	not mentioned	NI	N	significantly higher parity in SUI patiente	NI	Severity not mentioned, however diagnosed by urodynamic investigation. Undergoing surgery	NA	NA	N	UDO performed, severity of SUI not mentioned	Y	matched groups in age, bmi	PY	most likely	PN	crossectional design	Low risk of bias	towards null	N	Selection based on SUI	NA	NA	PN	Not stated for how long patients had SUI	NI	Not mentioned	Moderate	away from null	Y	SUI was UDO confirmed, severity was not mentioned	Y	NA	N	not possible	Low	towards null	N	crosssectional and age matched	NA
Liu et al. 2014	Y	numbers mentioned and not significantly different	NA	Y	numbers mentioned and not significantly different	NA	Y	all postmenopausal	NA	Y	all vaginal delivery	NA	Y	numbers mentioned and not significantly different	NA	No information of diagnosis of SUI, no severity mentioned	NA	NA	No information of diagnosis of SUI, no severity mentioned	NA	Y	matched groups in age, bmi, mode of delivery, parity and menopausal status	PY	most likely	PN	crossectional design	Medium high risk of bias	away from null	N	Selection based on SUI	NA	NA	PN	Not stated for how long patients had SUI	NI	Not mentioned	Moderate	away from null	PN	SUI was stated however no clear definition	Y	NA	N	not possible	Serious	away from null	N	crosssectional and age matched	NA
Koch et al. 2016	Y	numbers mentioned and not significantly different	NA	Y	numbers mentioned and not significantly different	NA	Y	numbers mentioned and not significantly different	NA	Y	numbers mentioned and not significantly different	NA	Y	numbers mentioned and not significantly different	NA	severity mentioned, and UDO performed!	NA	NA	N	UDO performed, severity of SUI not mentioned	Y	matched groups in age, bmi, mode of delivery, parity and menopausal status	PY	most likely	PN	crossectional design	Low risk of bias	towards null	N	Selection based on SUI	NA	NA	Y	complaints for at least 3 months	NA	NA	Low	towards null	Y	SUI was UDO confirmed, severity was not mentioned	Y	NA	N	not possible	Low	towards null	N	crosssectional and age matched	NA
Ozbek et al. 2016	Y	numbers mentioned and not significantly different	NA	N	significantly different, SUI higher BMI	NI	Y	numbers mentioned and most likely not significantly different	NA	NI	not mentioned	NI	Y	numbers mentioned and not significantly different	NA	Severity not mentioned, however if doubts of diagnosis urodynamic investigation was performed	NA	NA	N	UDO performed if necessary, severity of SUI not mentioned	Y	matched groups in age, parity	PY	most likely	PN	crossectional design	Low risk of bias	towards null	N	Selection based on SUI	NA	NA	PN	Not stated for how long patients had SUI	NI	Not mentioned	Moderate	away from null	Y	SUI was UDO confirmed when doubts, severity was not mentioned	Y	NA	N	not possible	Low	towards null	N	crosssectional and age matched	NA
Pantatosakis et al. 2016	Y	numbers mentioned and not significantly different	NA	Y	numbers mentioned and not significantly different	NA	Y	all postmenopausal	NA	NI	not mentioned	NI	Y	numbers mentioned and not significantly different	NA	Severity not mentioned, UDO not mentioned	NA	NA	PY	Severity not mentioned, and UDO not mentioned	Y	matched groups in age, parity	PY	most likely	PN	crossectional design	Medium Low	away from null	N	Selection based on SUI	NA	NA	PN	Not stated for how long patients had SUI	NI	Not mentioned	Moderate	away from null	PY	SUI was defined, not UDO confirmed	Y	NA	N	not possible	Moderate	away from null	N	crosssectional and age matched	NA
Augoulea et al. 2015	Y	numbers mentioned and not significantly different	NA	Y	numbers mentioned and not significantly different	NA	Y	all postmenopausal	NA	NI	not mentioned	NI	NI	not mentioned, no numbers given	NI	Severity not mentioned, UDO not mentioned	NA	NA	PY	Severity not mentioned, and UDO not mentioned	Y	matched groups in age, bmi, and menopausal status	PY	most likely	PN	crossectional design	Medium Low	away from null	N	Selection based on SUI	NA	NA	PN	Not stated for how long patients had SUI	NI	Not mentioned	Moderate	away from null	PY	SUI was defined, not UDO confirmed	Y	NA	N	not possible	Moderate	away from null	N	crosssectional and age matched	NA
Bodner-Adler et al. 2017	Y	numbers mentioned and not significantly different	NA	Y	numbers mentioned and not significantly different	NA	Y	numbers of postmenopausal years mentioned and not significantly different	NA	Y	numbers mentioned and not significantly different	NA	Y	numbers mentioned and not significantly different	NA	Severity was mentioned, no UDO performed, however strict exclusion criteria for UUI or DO	NA	NA	N	No UDO performed, however stric exclusion criteria for UUI/DO	Y	matched groups in age, parity, BMI, menopausal status and mode of delivery	PY	most likely	PN	crossectional design	Low risk of bias	towards null	N	Selection based on SUI	NA	NA	PN	Not stated for how long patients had SUI	NI	Not mentioned	Moderate	away from null	Y	SUI was confirmed by Pad test and cough test, severity was not mentioned	Y	NA	N	not possible	Low	towards null	N	crosssectional and age matched	NA
Fan et al. 2017	Y	numbers mentioned and not significantly different	NA	NI	not mentioned	NI	NI	not mentioned	NI	NI	not mentioned	NI	NI	not mentioned	NI	Severity not mentioned, however diagnosed by urodynamic investigation. Undergoing surgery	NA	NA	N	UDO performed, severity of SUI not mentioned	PY	matched groups in age, stated no significan differences in general parameters, however not defined	PY	most likely	PN	crossectional design	Medium Low	away from null	N	Selection based on SUI	NA	NA	PN	Not stated for how long patients had SUI	NI	Not mentioned	Moderate	away from null	Y	SUI was UDO confirmed, severity was not mentioned	Y	NA	N	not possible	Low	towards null	N	crosssectional and age matched	NA
Zhang et al. 2017	Y	numbers mentioned and not significantly different	NA	PY	numbers per group not mentioned, however not significantly different	NI	Y	numbers of postmenopausal years mentioned and not significantly different	NA	NI	not mentioned	NI	PY	numbers per group not mentioned, however not significantly different	NI	Severity not mentioned, however diagnosed by urodynamic investigation. Undergoing surgery	NA	NA	N	UDO performed, severity of SUI not mentioned	Y	matched groups in age, parity, BMI, menopausal status	PY	most likely	PN	crossectional design	Low risk of bias	away from null	N	Selection based on SUI	NA	NA	PN	Not stated for how long patients had SUI	NI	Not mentioned	Moderate	away from null	Y	SUI was UDO confirmed, severity was not mentioned	Y	NA	N	not possible	Low	towards null	N	crosssectional and age matched	NA
Adamiak et al. 2018	Y	numbers mentioned and not significantly different	NA	NI	not mentioned	NI	Y	Looked at menopausal differences	NA	NI	not mentioned	NI	NI	not mentioned	NI	Severity not mentioned, however diagnosed by urodynamic investigation. Undergoing surgery	NA	NA	N	UDO performed, severity of SUI not mentioned	PY	menopausal status matched and matched in age, no info on BMI and other confounding factors	PY	most likely	PN	crossectional design	Medium Low	away from null	N	Selection based on SUI	NA	NA	PN	Not stated for how long patients had SUI	NI	Not mentioned	Moderate	away from null	Y	SUI was UDO confirmed, severity was not mentioned	Y	NA	N	not possible	Low	towards null	N	crosssectional and age matched	NA
Khadzieva et al. 2018	NI	Of SUI alone no information mentioned	NI	NI	Of SUI alone no information mentioned	NI	NI	not mentioned	NI	NI	Of SUI alone no information mentioned	NI	NI	Of SUI alone no information mentioned	NI	No information of diagnosis of SUI, no severity mentioned	NA	NA	No information of diagnosis of SUI, no severity mentioned	NA	NI	no information on SUI only	NI	no information on SUI only	PN	crossectional design	High risk of bias	away from null	N	Selection of SUI patients based on SUI	NA	NA	PN	Not stated for how long patients had SUI	NI	Not mentioned	Moderate	away from null	PN	SUI was stated however no clear definition	Y	NA	N	not possible	Serious	away from null	PN	not sure if age matched however crossectional	NA
Koch et al. 2018	Y	numbers mentioned and not significantly different	NA	N	significantly different, SUI higher BMI	NI	Y	numbers mentioned and not significantly different	NA	Y	numbers mentioned and not significantly different	NA	Y	numbers mentioned and not significantly different	NA	severity mentioned, and UDO performed!	NA	NA	N	UDO performed, severity of SUI not mentioned	Y	matched groups in age, bmi, mode of delivery, parity and menopausal status	PY	most likely	PN	crossectional design	Low risk of bias	towards null	N	Selection based on SUI	NA	NA	Y	complaints for at least 3 months	NA	NA	Low	towards null	Y	SUI was UDO confirmed, severity was not mentioned	Y	NA	N	not possible	Low	towards null	N	crosssectional and age matched	NA
Ozcan et al. 2018	Y	numbers mentioned and not significantly different	NA	Y	numbers mentioned and not significantly different	NA	Y	Looked at menopausal differences	NA	NI	not mentioned	NI	Y	numbers mentioned and not significantly different	NA	Severity not mentioned, UDO not mentioned	NA	NA	PY	Severity not mentioned, and UDO not mentioned	Y	matched groups in age, parity, BMI and checked for menopausal differences	PY	most likely	PN	crossectional design	Medium Low	away from null	N	Selection based on SUI	NA	NA	PN	Not stated for how long patients had SUI	NI	Not mentioned	Moderate	away from null	Y	SUI was confirmed by cough test, severity was not mentioned	Y	NA	N	not possible	Low	towards null	N	crosssectional and age matched	NA
Yang et al. 2018	Y	numbers mentioned and not significantly different	NA	Y	numbers mentioned and not significantly different	NA	NI	not mentioned	NI	Y	numbers mentioned and not significantly different	NA	Y	numbers mentioned and not significantly different	NA	Severity not mentioned, UDO not mentioned	NA	NA	PY	Severity not mentioned, and UDO not mentioned	Y	matched groups in age, parity, BMI	PY	most likely	PN	crossectional design	Medium Low	away from null	N	Selection based on SUI	NA	NA	PN	Not stated for how long patients had SUI	NI	Not mentioned	Moderate	away from null	PN	SUI defined by ICS< no mentioning of UDO of any other test for diagnosis	Y	NA	N	not possible	Serious	away from null	N	crosssectional and age matched	NA
Zhou et al. 2018	Y	numbers mentioned and not significantly different	NA	Y	numbers mentioned and not significantly different	NA	Y	all postmenopausal	NA	NI	not mentioned	NI	Y	numbers mentioned and not significantly different	NA	Severity not mentioned, however diagnosed by urodynamic investigation. Undergoing surgery	NA	NA	N	UDO performed, severity of SUI not mentioned	Y	matched groups in age, parity, BMI all postmenopausal	PY	most likely	PN	crossectional design	Low risk of bias	away from null	N	Selection based on SUI	NA	NA	PN	Not stated for how long patients had SUI	NI	Not mentioned	Moderate	away from null	Y	SUI was UDO confirmed, severity was not mentioned	Y	NA	N	not possible	Low	towards null	N	crosssectional and age matched	NA
Li et al. 2019	PY	numbers mentioned, significance not mentioned, not likely to be significantly different due to low numbers	NI	NI	not mentioned	NI	Y	all postmenopausal	NA	NI	not mentioned	NI	NI	not mentioned	NI	Severity mentioned, UDO not mentioned, unergoing surgery	NA	NA	PN	severity was mentioned, no udo or other diagnostic test mentioned	PY	all postmenopausal and most likely matched in age, no info on BMI and other confounding factors	PY	most likely	PN	crossectional design	Medium Low	away from null	N	Selection based on SUI	NA	NA	PN	Not stated for how long patients had SUI	NI	Not mentioned	Moderate	away from null	PY	SUI was defined, not UDO confirmed	Y	NA	N	not possible	Moderate	away from null	PN	not sure if age matched however crossectional	NA
Penney 2019	Y	Most likely well meassured, controlled for confounding factors	NA	Y	Most likely well meassured, controlled for confounding factors	NA	NI	there is no information on this topic	no information	NI	there is no information on this topic	no information	Y	Most likely well meassured, controlled for confounding factors	NA	no UDO, severity differed, self-reported	see former answer	no information	PY	biennal questionnaire, no UDO	PY	they controlled for age, bmi and parity	PY	not explained, could be self-reported	PN	was controlled for in gwas	Medium high risk of bias	unpredictable	N	selection based on SUI	NA	NA	PN	it is not mentioned whether for how long pts had SUI	PN	it is not mentioned whether for how long pts had SUI	Moderate	away from null?	PN	definition based on biennal questionnaire, no test performed	Y	NA	N	intervention based on selfreported SUI	Moderate	away from null?	NI	not mentioned	NA
Reischer et al. 2019	Y	numbers mentioned and not significantly different	NA	Y	numbers mentioned and not significantly different	NA	Y	numbers mentioned and not significantly different	NA	Y	numbers mentioned and not significantly different	NA	Y	numbers mentioned and not significantly different	NA	Severity not mentioned, however diagnosed by cough test	NA	NA	N	Stress-test performed, severity of SUI not mentioned	Y	matched groups in age, parity, BMI, menopausal status	PY	most likely	PN	crossectional design	Low risk of bias	away from null	N	Selection based on SUI	NA	NA	N	At least 3 months of complaints	NA	NA	Low	towards null	Y	SUI was stresstest confirmed, severity was not mentioned	Y	NA	N	not possible	Low	towards null	N	crosssectional and age matched	NA
Wang et al. 2019	NI	no information	unknown	NI	no information	unknown	NI	no information	unknown	NI	no information	unknown	NI	no information	unknown	Severity not mentioned, UDO not mentioned, undergoing surgery	NA	NA	PY	Severity not mentioned, and UDO not mentioned	NI	No information on any confounding factor	NI	No information on any confounding factor	NI	No information on any confounding factor	High risk of bias	away from null	N	selectio based on SUI	na	na	PN	it is not mentioned whether for how long pts had SUI	PN	it is not mentioned whether for how long pts had SUI	Moderate	away from null?	PN	SUI defined by ICS< no mentioning of UDO of any other test for diagnosis	Y	NA	N	not possible	Serious	away from null	NI	not mentioned	NA
Zhang et al. 2019	Y	numbers mentioned and not significantly different	NA	Y	numbers mentioned and not significantly different	NA	NI	no information	unknown	NI	no information	unknown	Y	numbers mentioned and not significantly different	NA	Severity not mentioned, UDO not mentioned, undergoing surgery	NA	NA	PY	Severity not mentioned, and UDO not mentioned	Y	matched groups in age, parity, BMI	PY	most likely	PN	crossectional design	Medium low	towards null	N	selectio based on SUI or POP+SUI	na	na	PN	it is not mentioned whether for how long pts had SUI	PN	it is not mentioned whether for how long pts had SUI	Moderate	away from null?	PN	SUI defined as undergoing surgery, no mentioning of UDO of any other test for diagnosis	Y	NA	N	not possible	Serious	away from null	N	crosssectional and age matched	NA
Wei et al. 2020	Y	numbers mentioned and not significantly different	NA	Y	numbers mentioned and not significantly different	NA	Y	all postmenopausal	no information	NI	no information	unknown	Y	numbers mentioned and not significantly different	NA	Severity not mentioned, however diagnosed by urodynamic investigation. Undergoing surgery	NA	NA	N	UDO performed, severity of SUI not mentioned	Y	matched groups in age, parity, BMI all postmenopausal	PY	most likely	PN	crossectional design	Low risk of bias	away from null	N	selectio based on SUI	na	na	PN	it is not mentioned whether for how long pts had SUI	PN	it is not mentioned whether for how long pts had SUI	Moderate	away from null?	Y	SUI was UDO confirmed, severity was not mentioned	Y	NA	N	not possible	Low	towards null	N	crosssectional and age matched	NA
[truncated: 46 more columns]

## Sheet: Supplementary table 5 SYRCLE
SYRCLE First author year of publication	selection bias: sequence generation	Selection bias: baseline characteristics	Selection bias: allocation concealment	Selection bias: Risk of bias judgement	Selection bias: optional	Perfomance bias: Random housing	Performance bias: blinding	Performance bias: Risk of bias judgement	Performance bias: optional	Detection bias: random outcome assesment	Detection bias: blinding	Detection bias: Risk of bias judgement	Detection bias: optional	Attrition bias: incomplete outcome data	Reporting bias: selective outcome reporting	other sources of bias
Sievert et al. 2001	No information	Low risk of bias	No information	Unclear risk of bias	random is not mentioned, same strain and gender.	They were housed at a 16C constant room temperature and 47% humidity with 12-hour light-dark cycle with free access to standard laboratory chow and tap water.	No, blinding not mentioned	Unclear	NA	No, only random chosing of space of bladder	No, blinding not mentioned	Unclear	NA	No, 1 animal from group 4 was not mentioned in results, no reasons why (11 instead of 12)	Y, all outcomes described	NA
Resplande et al. 2002	No information	Low risk of bias	NA	Unclear risk of bias	random allocation into groups is not mentioned, same strain and gender.	no information	No, blinding not mentioned	Unclear	NA	yes, during electromicroscopy, random rats of each group were chosen	Yes, pathologists blindly evaluated all pictures	Low	NA	No signs of missing data	all reported	NA
Lin et al. 2009	NA all rats undergo the induction method, only ones with SUI were selected as SUI	Low risk of bias	NA	Low risk of bias	NA	not enough information, 12h light/dark cycle, however no mentioning of food	No, blinding not mentioned	Unclear	NA	yes, during electromicroscopy, random rats of each group were chosen	No, blinding not mentioned	Unclear	NA	No signs of missing data	all reported	NA
Chen et al. 2012	yes, all mice were randomized in groups	Low risk of bias	NA	Low risk of bias	NA	no information	Yes blinding was mentioned	Unclear	NA	N, random selection of animals is not mentioned	Yes, blinding was mentioned	Unclear	NA	No signs of missing data	all reported	NA
Li et al. 2012b	Yes, all rats were randomly divided.	Low risk of bias	NA	Low risk of bias	NA	Unclear	No, blinding not mentioned	Unclear	NA	N, random selection of animals is not mentioned	No, blinding not mentioned	Unclear	NA	No signs of missing data	all reported	NA
Li et al. 2012a	Yes, all rats were randomly divided.	Low risk of bias	NA	Low risk of bias	NA	Unclear	No, blinding not mentioned	Unclear	NA	N, random selection of animals is not mentioned	No, blinding not mentioned	Unclear	NA	No signs of missing data	all reported	NA
Chen et al. 2013	yes, all mice were randomized in groups	Low risk of bias	NA	Low risk of bias	NA	Unclear	Yes blinding was mentioned	Unclear	NA	N, random selection of animals is not mentioned	Yes blinding was mentioned	Unclear	NA	No signs of missing data	all reported	NA
Hijaz et al. 2013	yes, all mice were randomized in groups	Low risk of bias	NA	Low risk of bias	NA	Unclear	No, blinding not mentioned	Unclear	NA	N, random selection of animals is not mentioned	No, blinding not mentioned	Unclear	NA	No signs of missing data	all reported	NA
Hong et al. 2013	Yes, all rats were randomly divided.	Low risk of bias	NA	Low risk of bias	NA	Unclear	No, blinding not mentioned	Unclear	NA	N, random selection of animals is not mentioned	Yes blinding was mentioned	Unclear	NA	No signs of missing data	all reported	NA
Huang et al. 2013a	Yes, all rats were randomly divided.	Low risk of bias	NA	Low risk of bias	NA	Unclear	No, blinding not mentioned	Unclear	NA	N, random selection of animals is not mentioned	No, blinding not mentioned	Unclear	NA	No signs of missing data	they did not mention if they picked the 5 rats randomly for RT-PCR examination of the tissue, the rest all reported	NA
Lenis et a. 2013	randomly was not mentioned	Low risk of bias	NA	Unclear risk of bias	NA	Unclear	No, blinding not mentioned	Unclear	NA	N, random selection of animals is not mentioned	No, blinding not mentioned	Unclear	NA	No signs of missing data	all reported	NA
Chen et al. 2014a	yes, all mice were randomized in groups	Low risk of bias	NA	Low risk of bias	NA	Unclear	No, blinding not mentioned	Unclear	NA	N, random selection of animals is not mentioned	No, blinding not mentioned	Unclear	NA	No signs of missing data	all reported	NA
Chen et al. 2014b	yes, all mice were randomized in groups	Low risk of bias	NA	Low risk of bias	NA	Unclear	No, blinding not mentioned	Unclear	NA	N, random selection of animals is not mentioned	No, blinding not mentioned	Unclear	NA	No signs of missing data	all reported	NA
Chen et al. 2015	NA genetic variation	NA genetic variation	NA	Low risk of bias	NA	Unclear	No, blinding not mentioned	Unclear	NA	N, random selection of animals is not mentioned	No, blinding not mentioned	Unclear	NA	No signs of missing data	all reported	NA
Wang et al. 2015	Yes, all rats were randomly divided.	Low risk of bias	NA	Low risk of bias	NA	Unclear	Yes blinding was mentioned	Unclear	NA	N, random selection of animals is not mentioned	Yes blinding was mentioned	Unclear	NA	discrepancy in induction group, started with 20, in results only 19 mentioned, also discrepancy in control group; previusoly 10 mentioned, in reults only 9.	Discrepancy in mentioned number of animals without explanation	NA
Song et al. 2016	Yes, all rats were randomly divided.	Low risk of bias, same age, gender, weight	NA	Low risk of bias	NA	Unclear	Yes blinding was mentioned	Unclear	NA	N, random selection of animals is not mentioned	Yes blinding was mentioned	Unclear	NA	No signs of missing data	all reported	NA
Sumino et al. 2016	Only VD rats were randomly devided into 3 treatment groups, so not all animals used in the study, it isn't a fully randomized selection	Low risk of bias, same age, gender, weight	NA	Unclear risk of bias	NA	Unclear	No, blinding not mentioned	Unclear	NA	N, random selection of animals is not mentioned	No, blinding not mentioned	Unclear	NA	Unclear, it is not really clear how many rats were in what group and used for what experiment	all reported	NA
Min et al. 2017	randomly was not mentioned	Low risk of bias, same age, gender, weight	NA	Unclear risk of bias	NA	Unclear	No, blinding not mentioned	Unclear	NA	N, random selection of animals is not mentioned	No, blinding not mentioned	Unclear	NA	No signs of missing data	all reported	NA
Tang et al. 2017a	yes, all mice were randomized in groups	Low risk of bias	NA	Low risk of bias	NA	Unclear	No, blinding not mentioned	Unclear	NA	N, random selection of animals is not mentioned	No, blinding not mentioned	Unclear	NA	No signs of missing data	all reported	NA
Tang et al. 2017b	yes, all mice were randomized in groups	Low risk of bias	NA	Low risk of bias	NA	Unclear	No, blinding not mentioned	Unclear	NA	N, random selection of animals is not mentioned	No, blinding not mentioned	Unclear	NA	No signs of missing data	all reported	NA
Wan et al. 2017	Yes, all rats were randomly divided.	Low risk of bias	NA	Low risk of bias	NA	two animals per cage, free access to tap water and food under conditions of 20-26C and 40-60% humidity, 12h light cycle.	Yes blinding was mentioned	Low risk of bias	NA	N, random selection of animals is not mentioned	Yes blinding was mentioned	Unclear	NA	No signs of missing data	all reported	NA
Yoshikawa et al. 2017	Yes, all rats were randomly divided.	Unclear, age was not mentioned, only adult	NA	Unclear risk of bias	NA	Unclear	No, blinding not mentioned	Unclear	NA	N, random selection of animals is not mentioned	No, blinding not mentioned	Unclear	NA	No signs of missing data	all reported	NA
Bilhar et al. 2018	randomly was not mentioned	Low risk of bias	NA	Unclear risk of bias	NA	housed at 22 ± 1°C under a 12-h light-dark cycle, no information about access to food and water	Yes blinding was mentioned	Unclear	NA	N, random selection of animals is not mentioned	Yes blinding was mentioned	Unclear	NA	No signs of missing data	all reported	NA
Latsyna et al. 2018	randomly was not mentioned	Unclear, age, strain not mentioned.	NA	Unclear risk of bias	NA	Unclear	No, blinding not mentioned	Unclear	NA	N, random selection of animals is not mentioned	No, blinding not mentioned	Unclear	NA	No signs of missing data	all reported	NA
Jiang et al. 2018	randomly was not mentioned	Unclear, age not mentioned.	NA	Unclear risk of bias	NA	Unclear	No, blinding not mentioned	Unclear	NA	N, random selection of animals is not mentioned	No, blinding not mentioned	Unclear	NA	No signs of missing data	all reported	NA
Li et al. 2018	randomly was not mentioned	Low risk of bias, strain, age, gender was the same	NA	Unclear risk of bias	NA	Unclear	No, blinding not mentioned	Unclear	NA	N, random selection of animals is not mentioned	No, blinding not mentioned	Unclear	NA	No signs of missing data	all reported	NA
Wu et al. 2018	Yes, all rats were randomly divided.	Low risk of bias, strain, age, gender was the same	NA	Low risk of bias	NA	Unclear	No, blinding not mentioned	Unclear	NA	Yes, all rats were randomly divided.	No, blinding not mentioned	Unclear	NA	No signs of missing data	all reported	NA
Li et al. 2019	randomly was not mentioned	Low risk of bias, strain, age, gender was the same	NA	Unclear risk of bias	NA	Unclear	No, blinding not mentioned	Unclear	NA	N, random selection of animals is not mentioned	No, blinding not mentioned	Unclear	NA	No signs of missing data	all reported	NA
Tang et al. 2019	yes, all mice were randomized in groups	Low risk of bias, strain, age, gender was the same	NA	Low risk of bias	NA	Unclear	No, blinding not mentioned	Unclear	NA	yes, all mice were randomized in groups	No, blinding not mentioned	Unclear	NA	No signs of missing data	all reported	NA
Yang et al. 2019	Yes, all rats were randomly divided.	Low risk of bias, strain, age, gender was the same	NA	Low risk of bias	NA	Unclear	No, blinding not mentioned	Unclear	NA	Yes, all rats were randomly divided.	No, blinding not mentioned	Unclear	NA	No signs of missing data	all reported	NA
Zeng et al. 2019	Yes, all rats were randomly divided.	Low risk of bias, strain, age, gender was the same	NA	Low risk of bias	NA	Unclear	No, blinding not mentioned	Unclear	NA	Yes, all rats were randomly divided.	No, blinding not mentioned	Unclear	NA	No signs of missing data	all reported	NA
Zordani et al. 2019	randomly was not mentioned	Low risk of bias	NA	Unclear risk of bias	NA	housed under standard condition, not enough information	No, blinding not mentioned	Unclear	NA	N, random selection of animals is not mentioned	No, blinding not mentioned	Unclear	NA	No signs of missing data	all reported	NA
Lo et al. 2020	randomly was not mentioned	Low risk of bias, strain, age, gender was the same	NA	Unclear risk of bias	NA	not enough information : The experimental procedures were done in accordance with the relevant guidelines and regulations of the institution.	No, blinding not mentioned	Unclear	NA	N, random selection of animals is not mentioned	No, blinding not mentioned	Unclear	NA	No signs of missing data	all reported	NA
Zhang et al. 2020a	Yes, all rats were randomly divided.	Low risk of bias, strain, age, gender was the same	NA	Low risk of bias	NA	Not enoudh data: experiments were performed in accordance with the guidelines and standards of IACUC	No, blinding not mentioned	Unclear	NA	Yes, all rats were randomly divided.	No, blinding not mentioned	Unclear	NA	No signs of missing data	all reported	NA
Zhang et al. 2020b	Yes, all rats were randomly divided.	Low risk of bias, strain, age, gender was the same	NA	Low risk of bias	NA	Unclear	No, blinding not mentioned	Unclear	NA	Yes, all rats were randomly divided.	No, blinding not mentioned	Unclear	NA	No signs of missing data	all reported	NA
